# Supplementary material for: Switching from gem-difluorovinylation to carboxylation: ligand-enabled palladium-catalyzed Heck annulation of alkene-tethered aryl halides with sodium difluorochloroacetate
Source: Royal Society of Chemistry journal article supplement (doi:10.1039/d4qo00392f), 2024-01-01

## Supporting Information

### Switching from *gem*-difluorovinylolation to carboxylation: ligand-enabled palladium-catalyzed Heck annulation of alkene-tethered aryl halides with sodium difluorochloroacetate

Yu Xia\*, Wenqi Li, Minzhu Wei, Yonghong Zhang, Bin Wang, Shaofeng Wu, and Chenjiang Liu\*

Urumqi Key Laboratory of Green Catalysis and Synthesis Technology, Key Laboratory of Oil and Gas Fine Chemicals, Ministry of Education & Xinjiang Uygur Autonomous Region, State Key Laboratory of Chemistry and Utilization of Carbon Based Energy Resources, College of Chemistry, Xinjiang University, Urumqi 830017, P. R. China

E-mail; 18509487642@163.com; pxylcj@126.com

### Table of contents

|                                                                                 |    |
|---------------------------------------------------------------------------------|----|
| 1. General information .....                                                    | 2  |
| 2. Preparation of Substrates .....                                              | 2  |
| 2.1 General Procedure for the Synthesis of Substrates 1a,1b-1h.....             | 2  |
| 2.2 Synthesis of Substrates 1i-1k.....                                          | 3  |
| 3 Typical Procedures, optimized reaction conditions and Mechanism studies ..... | 4  |
| 3.1 Gram-Scale Reaction .....                                                   | 4  |
| 3.2 General Procedure for the Synthesis of Compound 5a .....                    | 6  |
| 3.3 General Procedure for the Synthesis of Compound 5b .....                    | 6  |
| 3.4 Optimized reaction conditions .....                                         | 7  |
| 3.5 Mechanism studies .....                                                     | 8  |
| 4. Characterization Data .....                                                  | 10 |
| 5. X-Ray Crystallography Data of 3h and 4a.....                                 | 20 |
| 6. NMR Spectra .....                                                            | 23 |

## 1. General information

$^1\text{H}$ ,  $^{13}\text{C}$ , and  $^{19}\text{F}$  NMR spectra were recorded on Bruker 800 MHz or Bruker Avance NEO 600 (600, 151, 201 and 565 MHz, respectively) NMR spectrometer.  $^1\text{H}$  and  $^{13}\text{C}$  NMR chemical shifts were determined relative to internal standard TMS at  $\delta$  0.0,  $\text{CDCl}_3$  ( $\delta(^1\text{H})$ , 7.26 ppm;  $\delta(^{13}\text{C})$ , 77.16 ppm),  $\text{DMSO-d}_6$  ( $\delta(^1\text{H})$ , 2.50 ppm;  $\delta(^{13}\text{C})$ , 39.51 ppm). Chemical shifts ( $\delta$ ) are reported in ppm, and coupling constants ( $J$ ) are in Hertz (Hz). The following abbreviations are used to explain the multiplicities: s = singlet, d = doublet, t = triplet, q = quartet, m = multiplet. The HRMS analysis was obtained on an Agilent6540 UHD Q-TOF mass spectrometer. The melting point was recorded on BÜCHI (M-560) and uncorrected. The X-ray single crystal diffraction data were collected on a Bruker D8 VENTURE. Analytical thin layer chromatography (TLC) was performed on 0.25 mm silica gel 60 F254 plates and viewed by UV light (254 nm). Column chromatographic purification was performed using 200-300 mesh silica gel. Materials. All the chemical reagents were purchased from commercial sources and used as received unless otherwise indicated. Substrates **1** were synthesized in the lab by the reported procedures.

## 2. Preparation of Substrates

### 2.1 General Procedure for the Synthesis of Substrates **1a**,**1b**-**1h**

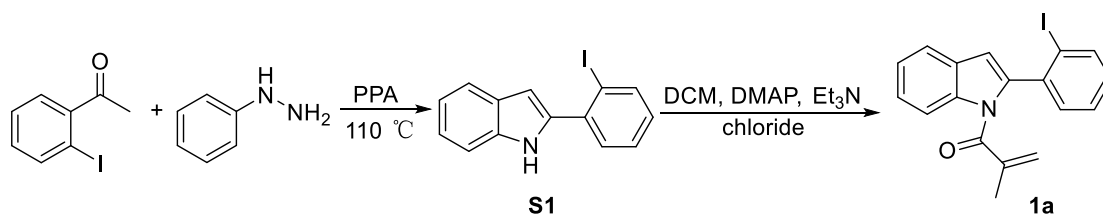

**Step I:** A mixture of 2-iodoacetophenone (5.0 mmol, 1.23 g), phenylhydrazine (6.0 mmol, 1.2 equiv, 0.65 g) and polyphosphoric acid (PPA, 15.0 g) was added to a round bottom flask and stirred at 110 °C for 6 h. After the completion of the reaction, the

residue was quenched with ice water and extracted into ethyl acetate. The organic phases were dried over anhydrous Na<sub>2</sub>SO<sub>4</sub> and concentrated in vacuo. The crude product was purified by silica gel column chromatography (petroleum ether/EtOAc) to give the corresponding substituted indole **S1** (70%, 1.12 g).

**Step II:** According to a literature procedure, to the solution of indole **S1** (3.5 mmol, 1.12 g) and DMAP (0.7 mmol, 0.2 equiv, 85 mg) in DCM (7 mL, 0.5 M) was added Et<sub>3</sub>N (7 mmol, 2.0 equiv, 0.71 g) and chloride (4.2 mmol, 1.2 equiv, 0.44 g) at 0 °C. The solution was warmed up to room temperature and stirred for overnight. The mixture was diluted with DCM (20 mL) and saturated NH<sub>4</sub>Cl solution (20 mL). The organic and aqueous layers were separated. The aqueous layer was extracted with DCM (2 x 20 mL). The combined organic layer was washed with brine, dried over Na<sub>2</sub>SO<sub>4</sub>, filtered and concentrated in vacuo to give a residue, which was purified by flash chromatography and then recrystallized from petroleum ether/EtOAc to afford the product **1a** (50%, 677 mg). Procedure for the synthesis of substrates **1b-1h** is similar to **1a**.

## 2.2 Synthesis of Substrates **1i-1k**

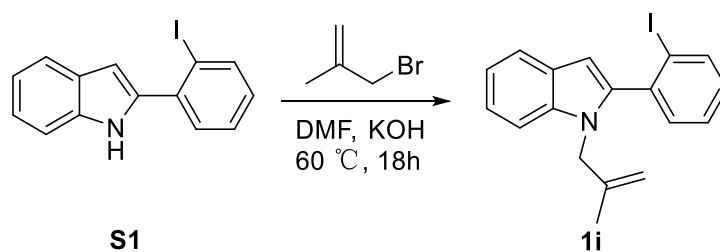

A solution of **S1** (6.0 mmol, 1.91 g) in 10 mL of DMF and powdered KOH (7.8 mmol, 1.3 equiv, 437 mg) was stirred at 60 °C for 10 min, cooled to rt, and treated with 3-bromo-2-methylprop-1-ene (8.9 mmol, 1.5 equiv, 1.20 g). The reaction mixture was stirred at 60 °C for 18 h, poured onto ice and diluted with 15 mL of EtOAc. The combined organic layers were washed with H<sub>2</sub>O, brine and dried by Na<sub>2</sub>SO<sub>4</sub>, concentrated in vacuo and purified by chromatography on SiO<sub>2</sub> (petroleum ether) to afford the desired product **4a** (63%, 1.41 g). Procedure for the synthesis of substrates **1j**, **1k** is similar to **1i**.

### 3 General Procedures, optimized reaction conditions and Mechanism studies

#### 3.1 General procedures and gram-scale reaction

##### 3.1.1 General procedure for 3a and 4a

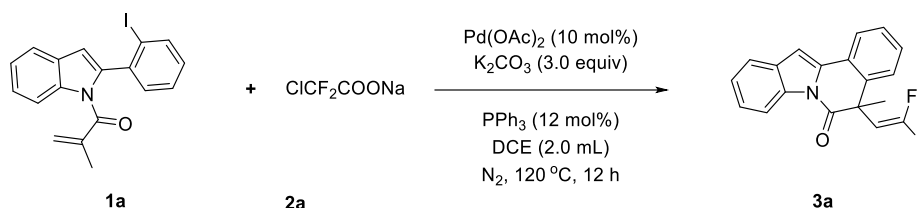

To a well dried 25 mL sealed tube with magnetic stir bar, 1-(2-(2-iodophenyl)-1*H*-indol-1-yl)-2-methylprop-2-en-1-one **1a** (77.6 mg, 0.2 mmol), chlorodifluoroacetate **2a** (60.1 mg, 0.4 mmol), Pd(OAc)<sub>2</sub> (4.4 mg, 10 mol%), K<sub>2</sub>CO<sub>3</sub> (83.2 mg, 0.6 mmol), PPh<sub>3</sub> (6.2 mg, 12 mol%) were dissolved in 2.0 mL DCE, resulting mixture was stirred at 120 °C (oil bath) for 12 h. When the reaction was finished, the reaction mixture was extracted by EtOAc (3 x 30 mL) and H<sub>2</sub>O. The organic layer was dried over by Na<sub>2</sub>SO<sub>4</sub>, filtered and the solvent removed in vacuo. The resultant residue was purified by silica gel column chromatography (eluent: petroleum ether/EtOAc = 20:1 to 5:1, v/v) to provide pure product **3a** (53.5 mg, 93% yield).

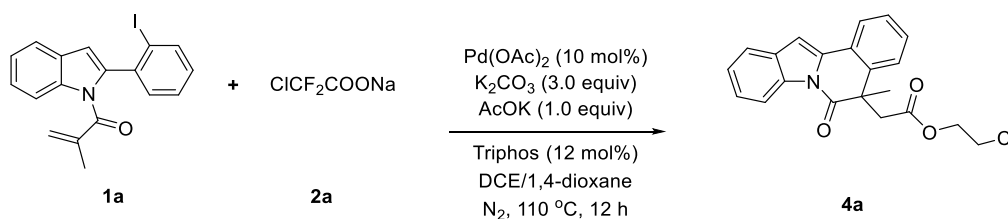

To a well dried 25 mL sealed tube with magnetic stir bar, 1-(2-(2-iodophenyl)-1*H*-indol-1-yl)-2-methylprop-2-en-1-one **1a** (77.6 mg, 0.2 mmol), chlorodifluoroacetate **2a** (60.2 mg, 0.4 mmol), Pd(OAc)<sub>2</sub> (4.4 mg, 10 mol%), K<sub>2</sub>CO<sub>3</sub> (83.2 mg, 0.6 mmol), AcOK (19.6 mg, 0.2 mmol), Triphos (15.4 mg, 12 mol%) were dissolved in DCE/Dioxane = 1/2 (v/v, 4 mL), resulting mixture was stirred at 110 °C (oil bath) for 12 h. When the reaction

was finished, the reaction mixture was extracted by EtOAc (3 x 30 mL) and H<sub>2</sub>O. The organic layer was dried over by Na<sub>2</sub>SO<sub>4</sub>, filtered and the solvent removed in vacuo. The resultant residue was purified by silica gel column chromatography (eluent: petroleum ether/EtOAc = 50:1 to 4:1, v/v) to provide pure product **4a** (62.6 mg, 85% yield).

### 3.1.2 gram-scale reaction

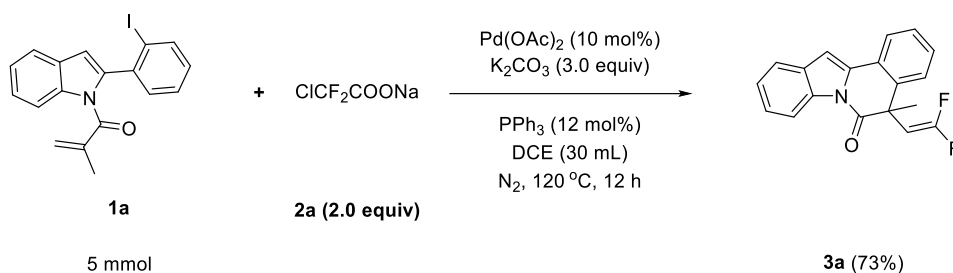

To a well dried 100 mL sealed tube with magnetic stir bar, 1-(2-(2-iodophenyl)-1*H*-indol-1-yl)-2-methylprop-2-en-1-one **1a** (1.94 g, 5 mmol), chlorodifluoroacetate **2a** (1.53 g, 10 mmol), Pd(OAc)<sub>2</sub> (0.11 g, 10 mol%), K<sub>2</sub>CO<sub>3</sub> (2.10 g, 15 mmol), PPh<sub>3</sub> (0.31 g, 12 mol%) were dissolved in 30 mL DCE, resulting mixture was stirred at 120 °C (oil bath) for 12 h. When the reaction was finished, the reaction mixture was extracted by EtOAc (3 x 30 mL) and H<sub>2</sub>O. The organic layer was dried over by Na<sub>2</sub>SO<sub>4</sub>, filtered and the solvent removed in vacuo. The resultant residue was purified by silica gel column chromatography (eluent: petroleum ether/EtOAc = 20/1 to 5/1, v/v) to provide pure product **3a** (1.13 g, 73% yield).

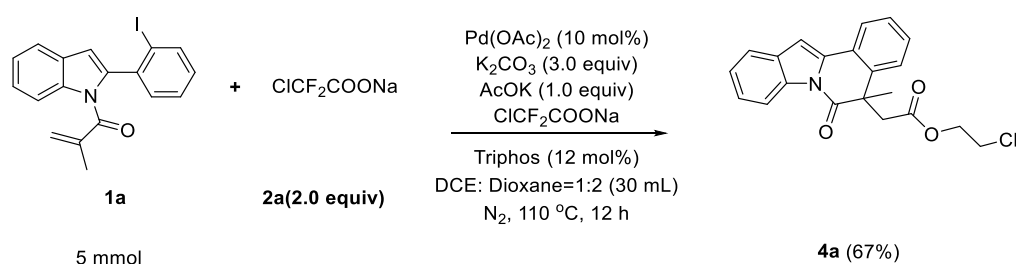

To a well dried 100 mL sealed tube with magnetic stir bar, 1-(2-(2-iodophenyl)-1*H*-indol-1-yl)-2-methylprop-2-en-1-one **1a** (1.94 g, 5 mmol), chlorodifluoroacetate **2** (1.53 g, 10 mmol), Pd(OAc)<sub>2</sub> (0.11 g, 10 mol%), K<sub>2</sub>CO<sub>3</sub> (2.10 g, 15 mmol), AcOK (0.49 g, 5 mmol), Triphos (0.38 g, 12 mol%) were dissolved in 30 mL DCE/1,4-dioxane (v/v = 1/2), resulting mixture was stirred at 110 °C (oil bath) for 12 h. When the reaction was finished, the reaction mixture was partitioned between EtOAc (3 x 30 mL) and H<sub>2</sub>O.

The organic layer was dried over Na<sub>2</sub>SO<sub>4</sub>, filtered and the solvent removed in vacuo. The resultant residue was purified by silica gel column chromatography (eluent: petroleum ether/EtOAc = 50:1 to 4:1, v/v) to provide pure product **4a** (1.23 g, 67% yield).

### 3.2 General Procedure for the Synthesis of Compound 5a

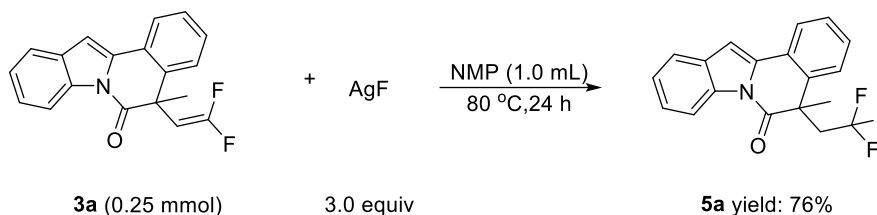

According to a modified literature procedure, to a stirred solution of 5-(2,2-difluorovinyl)-5-methylindolo[2,1-*a*]isoquinolin-6(5*H*)-one **3a** (77.3 mg, 0.25 mmol) in NMP (3 mL), AgF (136.8 mg, 0.75 mmol) was added at room temperature. The resultant solution was further stirred at 80 °C (oil bath) for 24 h. After completion, as indicated by TLC, the reaction mixture was cooled to room temperature and the resulting mixture was extracted with EtOAc (3 × 10 mL). Combined organic layer was dried over Na<sub>2</sub>SO<sub>4</sub>, filtered, and all of the volatiles were evaporated under reduced pressure. The resultant residue was purified by silica gel column chromatography (eluent: petroleum ether/EtOAc = 20:1 to 5:1, v/v) afford 5-methyl-5-(2,2,2-trifluoroethyl)-3,5-dihydroindolo[2,1-*a*]isoquinolin-6(2*H*)-one **5a** as a yellow oil in 76% yield (62.5 mg).

### 3.3 General Procedure for the Synthesis of Compound 5b

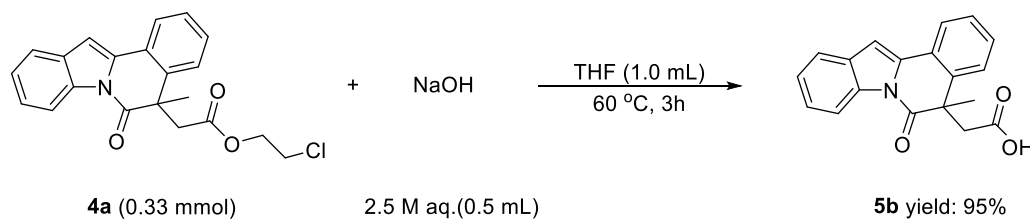

According to a modified literature procedure, to a stirred solution of 2-chloroethyl 2-(5-methyl-6-oxo-5,6-dihydroindolo[2,1-*a*]isoquinolin-5-yl)acetate **4a** (121.1 mg, 0.33

mmol) in THF (1 mL), NaOH (2.5 M aq., 0.5 mL) was added at room temperature. The resultant solution was further stirred at 60 °C (oil bath) for 3 h. After completion, as indicated by TLC, the reaction mixture was cooled to room temperature and the resulting mixture was extracted with EtOAc (3 × 10 mL). Combined organic layer was dried over Na<sub>2</sub>SO<sub>4</sub>, filtered, and all of the volatiles were evaporated under reduced pressure. The resultant residue was purified by silica gel column chromatography (eluent: petroleum ether/EtOAc = 20:1 to 5:1, v/v) afford 2-(5-methyl-6-oxo-5,6-dihydroindolo[2,1-*a*]isoquinolin-5-yl)acetic acid **5b** as a yellow oil in 95% yield (95.6 mg).

### 3.4 Optimized reaction conditions<sup>a</sup>

**Table S1** Optimization of the reaction conditions

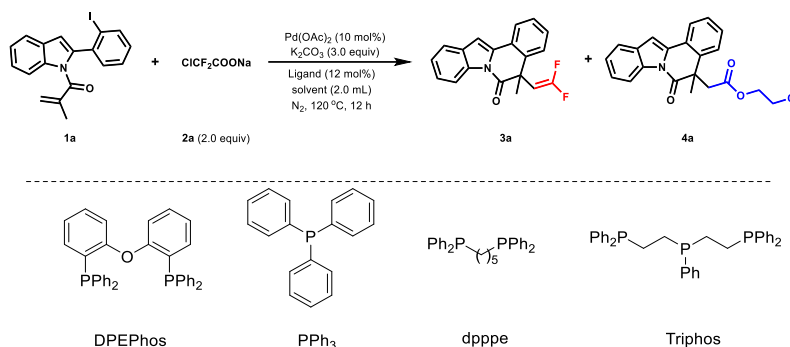

| Entry           | [Pd]                     | Ligand           | Base                            | Sol.        | Yield 3a | Yield 4a (%) <sup>b</sup> |
|-----------------|--------------------------|------------------|---------------------------------|-------------|----------|---------------------------|
| 1               | Pd(OAc) <sub>2</sub>     | PPh <sub>3</sub> | K <sub>2</sub> CO <sub>3</sub>  | DCE         | 93       | trace                     |
| 2               | Pd(TFA) <sub>2</sub>     | PPh <sub>3</sub> | K <sub>2</sub> CO <sub>3</sub>  | DCE         | 31       | 11                        |
| 3               | PdCl <sub>2</sub> (dipp) | PPh <sub>3</sub> | K <sub>2</sub> CO <sub>3</sub>  | DCE         | trace    | trace                     |
| 4               | Pd(OAc) <sub>2</sub>     | DPEphos          | K <sub>2</sub> CO <sub>3</sub>  | DCE         | 27       | 13                        |
| 5               | Pd(OAc) <sub>2</sub>     | dpppe            | K <sub>2</sub> CO <sub>3</sub>  | DCE         | 75       | 18                        |
| 6               | Pd(OAc) <sub>2</sub>     | dppm             | K <sub>2</sub> CO <sub>3</sub>  | DCE         | 43       | trace                     |
| 7               | Pd(OAc) <sub>2</sub>     | PPh <sub>3</sub> | AcONa                           | DCE         | NR       | NR                        |
| 8               | Pd(OAc) <sub>2</sub>     | PPh <sub>3</sub> | Cs <sub>2</sub> CO <sub>3</sub> | DCE         | NR       | NR                        |
| 9               | Pd(OAc) <sub>2</sub>     | PPh <sub>3</sub> | Na <sub>2</sub> CO <sub>3</sub> | DCE         | 11       | ND                        |
| 10              | Pd(OAc) <sub>2</sub>     | PPh <sub>3</sub> | K <sub>2</sub> CO <sub>3</sub>  | 1,4-dioxane | NR       | NR                        |
| 11              | Pd(OAc) <sub>2</sub>     | PPh <sub>3</sub> | K <sub>2</sub> CO <sub>3</sub>  | toluene     | trace    | ND                        |
| 12 <sup>c</sup> | Pd(OAc) <sub>2</sub>     | PPh <sub>3</sub> | K <sub>2</sub> CO <sub>3</sub>  | DCE         | 66       | trace                     |

<sup>a</sup>Reaction conditions: **1a** (0.2 mmol), **2a** (2.0 equiv.), [Pd] (10 mol%), ligand (12 mol%), base (3.0 equiv.) and solvent (2.0 mL) at 120 °C for 12 h under a N<sub>2</sub> atmosphere. <sup>b</sup>Isolated yield. NR = no reaction. <sup>c</sup> Pd(OAc)<sub>2</sub> (5 mol%). PdCl<sub>2</sub>(dipp) = dichloro(1,3-bis(diphenylphosphino)propane)palladium(II).

**Table S2** Optimization of the reaction conditions

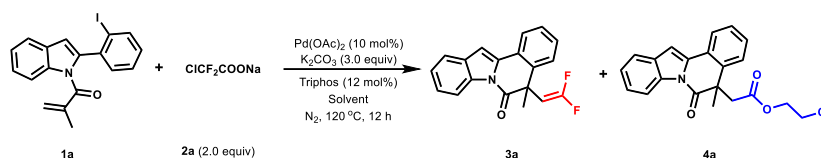

| Entry                 | Ligand           | Base                            | Sol.            | Yield 3a | Yield 4a (%) <sup>b</sup> |
|-----------------------|------------------|---------------------------------|-----------------|----------|---------------------------|
| 1                     | Triphos          | K <sub>2</sub> CO <sub>3</sub>  | DCE             | 6        | 43                        |
| 2                     | Triphos          | K <sub>2</sub> CO <sub>3</sub>  | DCE/DMA         | 11       | 0                         |
| 3 <sup>c</sup>        | Triphos          | K <sub>2</sub> CO <sub>3</sub>  | DCE/1,4-dioxane | trace    | 60                        |
| 4 <sup>c</sup>        | DPEphos          | K <sub>2</sub> CO <sub>3</sub>  | DCE/1,4-dioxane | trace    | 24                        |
| 5 <sup>c</sup>        | PPh <sub>3</sub> | K <sub>2</sub> CO <sub>3</sub>  | DCE/1,4-dioxane | 32       | trace                     |
| 6 <sup>c</sup>        | Triphos          | CS <sub>2</sub> CO <sub>3</sub> | DCE/1,4-dioxane | trace    | trace                     |
| 7 <sup>c</sup>        | Triphos          | K <sub>3</sub> PO <sub>4</sub>  | DCE/1,4-dioxane | trace    | trace                     |
| 8 <sup>c,d</sup>      | Triphos          | K <sub>2</sub> CO <sub>3</sub>  | DCE/1,4-dioxane | 17       | 74                        |
| 9 <sup>c,d,e</sup>    | Triphos          | K <sub>2</sub> CO <sub>3</sub>  | DCE/1,4-dioxane | 12       | 78                        |
| 10 <sup>d,e,f</sup>   | Triphos          | K <sub>2</sub> CO <sub>3</sub>  | DCE/1,4-dioxane | trace    | 85                        |
| 11 <sup>d,e,f,g</sup> | Triphos          | K <sub>2</sub> CO <sub>3</sub>  | DCE/1,4-dioxane | trace    | ND                        |
| 12 <sup>d,e,f,h</sup> | Triphos          | K <sub>2</sub> CO <sub>3</sub>  | DCE/1,4-dioxane | trace    | ND                        |
| 13 <sup>d,e,f,i</sup> | Triphos          | K <sub>2</sub> CO <sub>3</sub>  | DCE/1,4-dioxane | NR       | NR                        |
| 14 <sup>d,e,f,j</sup> | Triphos          | K <sub>2</sub> CO <sub>3</sub>  | DCE/1,4-dioxane | trace    | 53                        |
| 15 <sup>d,e,f,k</sup> | Triphos          | K <sub>2</sub> CO <sub>3</sub>  | DCE/1,4-dioxane | ND       | ND                        |
| 16 <sup>d,e,f,l</sup> | Triphos          | K <sub>2</sub> CO <sub>3</sub>  | DCE/1,4-dioxane | ND       | ND                        |

<sup>a</sup>Reaction conditions: 1a (0.2 mmol), 2a (2.0 equiv.), [Pd] (10 mol%), ligand (12 mol%), base (3.0 equiv.) and solvent (2.0 mL) at 120 °C for 12 h under a N<sub>2</sub> atmosphere. <sup>b</sup>Isolated yield. <sup>c</sup>DCE/1,4-dioxane = 1/1 (v/v, 2.0 mL). <sup>d</sup>KOAc (1.0 equiv) was added. <sup>e</sup>110°C. <sup>f</sup>DCE/1,4-dioxane = 1/2 (v/v, 4.0 mL). <sup>g</sup> 2a changed by ClCF<sub>2</sub>COOEt. <sup>h</sup>2a changed by BrCF<sub>2</sub>TMS. <sup>i</sup>2a changed by KOAc. <sup>j</sup> Pd(OAc)<sub>2</sub> (5 mol%). <sup>k</sup> DCE changed by DCM. <sup>l</sup>DCE changed by BrCH<sub>2</sub>CH<sub>2</sub>Br.

### 3.5 Mechanism studies

#### 3.5.1 Control experiments

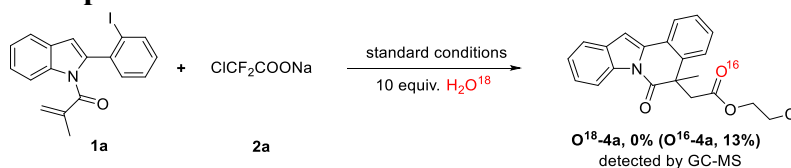

When added 10 equiv. H<sub>2</sub>O<sup>18</sup>, we did not detect C=O<sup>18</sup>. So, the source of carbonyl could not come from Pd=CF<sub>2</sub> hydrolysis.

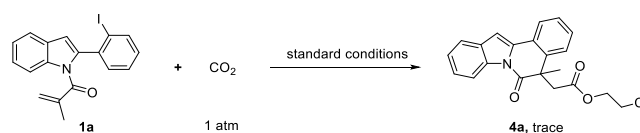

When we replaced ClCF<sub>2</sub>COONa with CO<sub>2</sub> gas (1 atm), we could obtain 4a in trace yield. So, we think that the concentration of CO<sub>2</sub> from ClCF<sub>2</sub>COONa in solvent is much more than CO<sub>2</sub> gas.

#### 3.5.2 GC-MS for CO<sub>2</sub> Concentration



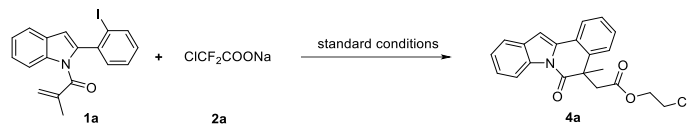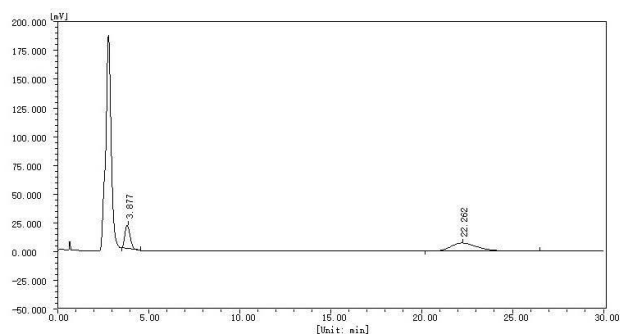

Analysis result (external standard method)

| Entry  | Component | Retention time [min] | Full width at half maxima [min] | peak height [uV] | peak area [uV*s] | peak area [%] | content [mg/m3] | peak type |
|--------|-----------|----------------------|---------------------------------|------------------|------------------|---------------|-----------------|-----------|
| 1      | CO        | 3.877                | 0.317                           | 20620.4          | 426679.2         | 36.6414       | 80067.6406      | BB        |
| 2      | CO2       | 22.262               | 1.676                           | 7114.8           | 741253.1         | 63.3586       | 308061.1563     | BB        |
| Total: |           |                      |                                 | 27935.1          | 1169932.3        | 100.0000      | 368128.7969     |           |

Subsequently, we detected the concentration of CO<sub>2</sub> in solvent. The experiment result showed that the CO<sub>2</sub> concentration coming from ClCF<sub>2</sub>COONa is very high.

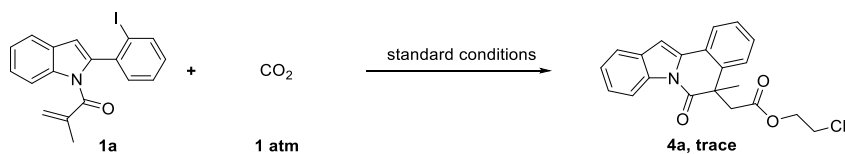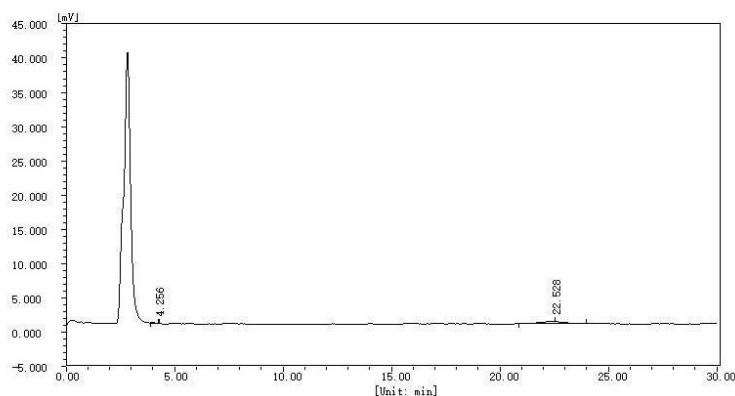

analysis result (external standard method)

| Entry  | Component | Retention time [min] | Full width at half maxima [min] | peak height [uV] | peak area [uV*s] | peak area [%] | content [mg/m3] | peak type |
|--------|-----------|----------------------|---------------------------------|------------------|------------------|---------------|-----------------|-----------|
| 1      | CO        | 4.256                | 0.391                           | 70.0             | 898.0            | 2.7839        | 898.0179        | BB        |
| 2      | CO2       | 22.528               | 1.275                           | 358.1            | 31359.6          | 97.2161       | 13032.8799      | BB        |
| Total: |           |                      |                                 | 428.0            | 32257.6          | 100.0000      | 13930.8978      |           |

We also detected the concentration of CO<sub>2</sub> in solvent, which CO<sub>2</sub> came from CO<sub>2</sub> gas. The experiment result showed that the CO<sub>2</sub> concentration coming from CO<sub>2</sub> gas is very low. The low CO<sub>2</sub> concentration in solvent may not facilitate the reaction.

### 3.6 Gram-scale

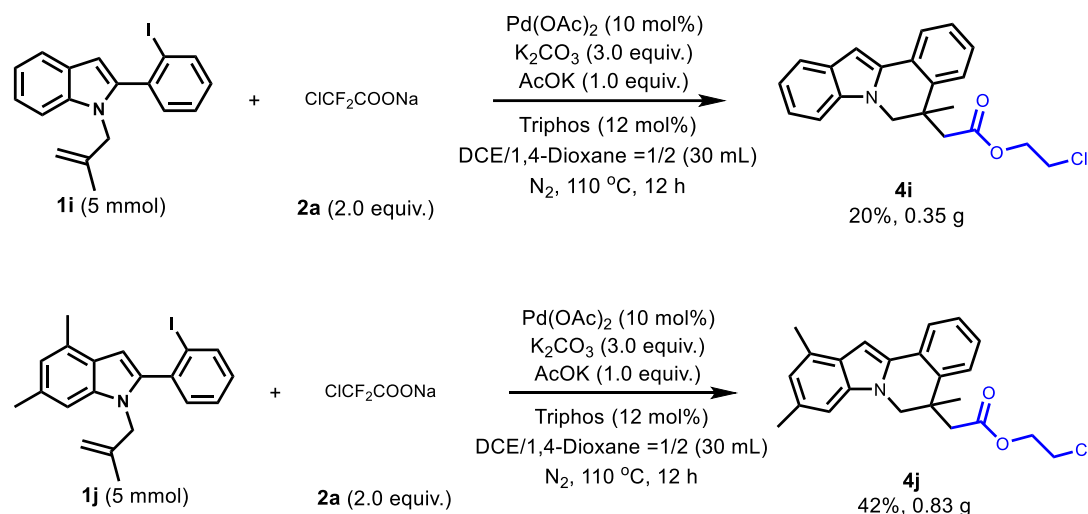

The reaction of *N*-allyl indole **1j** with **2a** was performed on a gram scale, furnishing the corresponding product **4j** in 42% yield (0.83 g). The reaction of *N*-allyl indole **1i** with **2a** was performed on a gram scale, furnishing the corresponding product **4i** in 20% yield (0.35 g).

## 4. Characterization Data

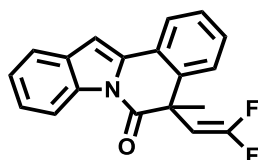

**5-(2,2-difluorovinyl)-5-methylindolo[2,1-a]isoquinolin-6(5H)-one (3a):** Eluent: petroleum ether/EtOAc = 20:1 to 5:1 (v/v). New compound. 57.5 mg, 93% yield. Yellow oil.  $^1\text{H NMR}$  (800 MHz,  $\text{CDCl}_3$ )  $\delta$  8.47 (dd,  $J = 8.8, 4.0$  Hz, 1H), 7.82 – 7.81 (m, 1H), 7.41 – 7.38 (m, 3H), 7.24 (dd,  $J = 8.0, 2.4$  Hz, 1H), 7.08 (td,  $J = 8.8, 2.4$  Hz, 1H), 6.99 (s, 1H), 4.74 (dd,  $J = 25.6, 3.2$  Hz, 1H), 1.83 (s, 3H).  $^{13}\text{C NMR}$  (151 MHz,  $\text{CDCl}_3$ )  $\delta$  171.1, 156.7(dd,  $J = 296.0, 289.9$  Hz), 138.5, 135.6, 135.2, 130.8, 129.2, 127.9, 127.3, 125.6, 124.9, 123.9, 120.7, 116.7, 103.7, 84.5 (dd,  $J = 27.2, 13.6$  Hz), 46.1 (dd,  $J = 4.5, 1.5$  Hz), 30.2 (d,  $J = 3.0$  Hz).  $^{19}\text{F NMR}$  (565 MHz,  $\text{CDCl}_3$ )  $\delta$  -2.94 (d,  $J = 33.9$  Hz), -6.09 (d,  $J = 39.6$  Hz). **HRMS** (ESI)  $m/z$  Calcd for  $\text{C}_{19}\text{H}_{14}\text{F}_2\text{NO}$   $[\text{M}+\text{H}]^+$ :

310.1044; Found: 310.1038.

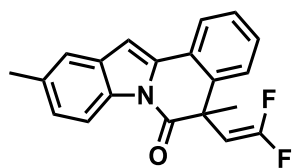

**5-(2,2-difluorovinyl)-5,10-dimethylindolo[2,1-a]isoquinolin-6(5H)-one (3b):**

Eluent: petroleum ether/EtOAc = 20:1 to 5:1 (v/v). New compound. 32.0 mg, 51% yield. Yellow oil. <sup>1</sup>H NMR (600 MHz, DMSO) δ 8.27 (d, J = 8.4 Hz, 1H), 8.02 (dd, J = 6.0, 4.0 Hz, 1H), 7.50 (dd, J = 7.2, 4.2 Hz, 1H), 7.44 (s, 1H), 7.43 – 7.41 (m, 2H), 7.34 (s, 1H), 7.18 (d, J = 8.4 Hz, 1H), 5.25 (dd, J = 28.2, 3.6 Hz, 1H), 2.40 (s, 3H), 1.74 (s, 3H). <sup>13</sup>C NMR (151 MHz, CDCl<sub>3</sub>) δ 170.2, 155.2 (dd, J = 286.9, 292.9 Hz), 138.2, 135.0, 133.9, 132.9, 130.7, 129.2, 127.8, 127.4, 126.4, 123.9, 122.8, 120.7, 115.5 (d, J = 6.0 Hz), 103.6, 85.5 (dd, J = 25.7, 12.1 Hz), 45.2 (dd, J = 4.53, 1.5 Hz), 29.5, 21.0. <sup>19</sup>F NMR (565 MHz, DMSO) δ -5.06 (d, J = 45.2 Hz), -8.88 (d, J = 45.2 Hz). HRMS (ESI) m/z Calcd for C<sub>20</sub>H<sub>16</sub>F<sub>2</sub>NO [M+H]<sup>+</sup>: 324.1200; Found: 324.1195.

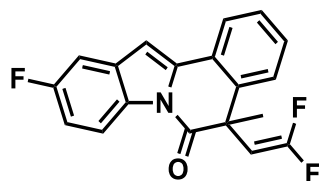

**5-(2,2-difluorovinyl)-10-fluoro-5-methylindolo[2,1-a]isoquinolin-6(5H)-one (3c):**

Eluent: petroleum ether/EtOAc = 20:1 to 5:1 (v/v). New compound. 58.8 mg, 91% yield. Yellow oil. <sup>1</sup>H NMR (600 MHz, DMSO) δ 8.38 (dd, J = 9.0, 4.8 Hz, 1H), 8.03 – 8.02 (m, 1H), 7.52 – 7.49 (m, 1H), 7.45 – 7.40 (m, 3H), 7.37 (s, 1H), 7.17 (td, J = 9.0, 3.0 Hz, 1H), 5.22 (dd, J = 28.2, 3.6 Hz, 1H), 1.73 (s, 3H). <sup>13</sup>C NMR (151 MHz, DMSO) δ 170.3, 159.6 (d, J = 240.1 Hz), 155.3 (dd, J = 286.9, 292.9 Hz), 138.5, 136.7, 131.8 (d, J = 4.5 Hz), 131.2, 129.5, 127.9, 127.4, 124.1, 122.4, 117.1 (d, J = 9.1 Hz), 112.6, 112.4, 106.5, 106.4, 103.3 (d, J = 3.0 Hz), 85.3 (dd, J = 25.7, 12.1 Hz), 45.3 (dd, J = 6.0, 1.5 Hz), 29.4. <sup>19</sup>F NMR (565 MHz, DMSO) δ -5.99 (d, J = 45.2 Hz), -6.42 (d, J = 45.2 Hz), -39.79. HRMS (ESI) m/z Calcd for C<sub>20</sub>H<sub>16</sub>F<sub>2</sub>NO [M+H]<sup>+</sup>: 328.0949; Found: 328.0944.

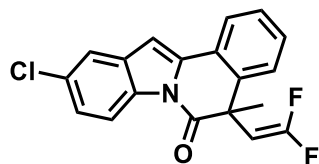

**10-chloro-5-(2,2-difluorovinyl)-5-methylindolo[2,1-*a*]isoquinolin-6(5*H*)-one(3d):**

Eluent: petroleum ether/EtOAc = 20:1 to 5:1 (v/v). New compound. 61.8 mg, 90% yield. Yellow oil.  $^1\text{H NMR}$  (600 MHz, DMSO)  $\delta$  8.36 (d,  $J = 9.0$  Hz, 1H), 8.03 (dd,  $J = 7.2, 1.2$  Hz, 1H), 7.70 (d,  $J = 2.4$  Hz, 1H), 7.52 – 7.50 (m, 1H), 7.46 – 7.41 (m, 2H), 7.37 – 7.35 (m, 2H), 5.23 (dd,  $J = 28.2, 3.6$  Hz, 1H), 1.74 (s, 3H).  $^{13}\text{C NMR}$  (151 MHz, DMSO)  $\delta$  170.5, 155.3 (dd,  $J = 294.45, 286.9$  Hz), 138.5, 136.5, 133.2, 132.0, 129.7, 129.0, 127.9, 127.4, 124.9, 124.2, 122.3, 120.2, 117.2, 102.9, 85.3 (dd,  $J = 25.7, 12.1$  Hz), 45.3 (d,  $J = 3.0$  Hz), 29.4 (d,  $J = 1.5$  Hz).  $^{19}\text{F NMR}$  (565 MHz, DMSO)  $\delta$  -4.82(d,  $J = 39.6$  Hz), -8.46(d,  $J = 45.2$  Hz). **HRMS** (ESI)  $m/z$  Calcd for  $\text{C}_{19}\text{H}_{13}\text{ClF}_2\text{NO}$   $[\text{M}+\text{H}]^+$ : 344.0654; Found: 344.0648.

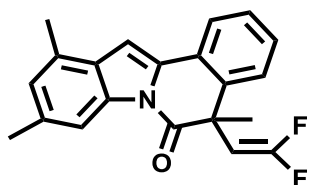

**5-(2,2-difluorovinyl)-5,9,11-trimethylindolo[2,1-*a*]isoquinolin-6(5*H*)-one (3e):**

Eluent: petroleum ether/EtOAc = 20:1 to 5:1 (v/v). New compound. 44.4 mg, 66% yield. Yellow oil.  $^1\text{H NMR}$  (800 MHz,  $\text{CDCl}_3$ )  $\delta$  8.22 (s, 1H), 7.84 (d,  $J = 7.2$  Hz, 1H), 7.40 – 7.34 (m, 3H), 7.05 (s, 1H), 6.99 (s, 1H), 4.74 (dd,  $J = 26.4, 4.0$  Hz, 1H), 2.55 (s, 3H), 2.48 (s, 3H), 1.82 (s, 3H).  $^{13}\text{C NMR}$  (201 MHz,  $\text{CDCl}_3$ )  $\delta$  171.2, 156.7 (dd,  $J = 293.5, 287.4$  Hz), 138.2, 136.1, 135.8, 134.0, 129.8, 128.8, 128.1, 127.8, 127.3, 126.8, 124.0, 123.7, 114.5, 102.3, 84.6 (dd,  $J = 28.1, 14.1$  Hz), 46.1 (d,  $J = 4.0$  Hz), 30.1 (d,  $J = 4.0$  Hz), 22.0, 18.6.  $^{19}\text{F NMR}$  (565 MHz,  $\text{CDCl}_3$ )  $\delta$  -3.11(d,  $J = 39.6$  Hz), -6.28 (d,  $J = 39.6$  Hz). **HRMS** (ESI)  $m/z$  Calcd for  $\text{C}_{21}\text{H}_{18}\text{F}_2\text{NO}$   $[\text{M}+\text{H}]^+$ : 328.1357; Found: 338.1351.

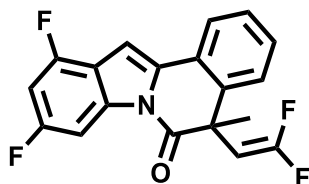

**5-(2,2-difluorovinyl)-9,11-difluoro-5-methylindolo[2,1-*a*]isoquinolin-6(5*H*)-one**

**(3f):** Eluent: petroleum ether/EtOAc = 20:1 to 5:1 (v/v). New compound. 34.5 mg, 50% yield. Yellow solid. Melting point: 85.6 – 86.3 °C.  $^1\text{H NMR}$  (800 MHz,  $\text{CDCl}_3$ )  $\delta$  8.08 (dd,  $J = 8.8, 1.6$  Hz, 1H), 7.80 (dd,  $J = 6.6, 3.2$  Hz, 1H), 7.41 – 7.37 (m, 3H), 7.06 (s,

1H), 6.82 (td,  $J = 9.6, 2.4$  Hz, 1H), 4.74 (dd,  $J = 26.4, 3.2$  Hz, 1H), 1.82 (s, 3H).  $^{13}\text{C}$  NMR (201 MHz,  $\text{CDCl}_3$ )  $\delta$  171.3, 161.3 (dd,  $J = 245.2, 12.1$  Hz), 156.8 (dd,  $J = 293.5, 287.4$  Hz), 155.0 (dd,  $J = 251.3, 14.1$  Hz), 138.3, 136.6 (dd,  $J = 16.8, 12.1$  Hz), 135.5 (d,  $J = 4.0$  Hz), 129.6, 128.1, 127.3, 123.8, 123.1, 116.1 (d,  $J = 20.1$  Hz), 100.6 (d,  $J = 4.3$  Hz), 100.50 (d,  $J = 4.3$  Hz), 100.4, 100.2 (d,  $J = 4.9$  Hz), 100.1, 98.6, 84.3 (dd,  $J = 28.1, 16.8$  Hz), 46.2 (dd,  $J = 6.0, 4.0$  Hz), 30.1 (d,  $J = 2.0$  Hz)  $^{19}\text{F}$  NMR (565 MHz, DMSO)  $\delta$  -2.54 (d,  $J = 39.6$  Hz), -5.81 (d,  $J = 33.9$  Hz), -34.71 (d,  $J = 4.4$  Hz), -40.80 (d,  $J = 5.4$  Hz). HRMS (ESI)  $m/z$  Calcd for  $\text{C}_{20}\text{H}_{16}\text{F}_2\text{NO}$   $[\text{M}+\text{H}]^+$ : 346.0855; Found: 346.0850.

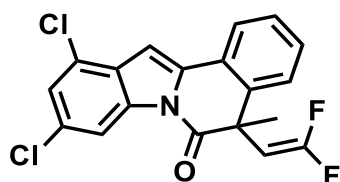

**9,11-dichloro-5-(2,2-difluorovinyl)-5-methylindolo[2,1-*a*]isoquinolin-6(5*H*)-one (3g)** : Eluent: petroleum ether/EtOAc = 20:1 to 5:1 (v/v). New compound. 50.0 mg, 66% yield. Yellow solid. Melting point: 114.5 – 115.4 °C.  $^1\text{H}$  NMR (600 MHz, DMSO)  $\delta$  8.31 (d,  $J = 1.2$  Hz, 1H), 8.16 (dd,  $J = 7.8, 1.2$  Hz, 1H), 7.53 (dd,  $J = 8.4, 1.2$  Hz, 1H), 7.50 (d,  $J = 1.8$  Hz, 1H), 7.49 – 7.46 (m, 2H), 7.44 (td,  $J = 7.8, 1.8$  Hz, 1H), 5.24 (dd,  $J = 28.2, 3.6$  Hz, 1H), 1.76 (s, 3H).  $^{13}\text{C}$  NMR (151 MHz, DMSO)  $\delta$  170.8, 155.4 (dd,  $J = 286.9, 294.5$  Hz), 138.4, 136.9, 135.1, 130.0, 129.6, 128.1, 128.0, 127.3, 125.4, 124.6, 124.1, 122.0, 114.6, 100.9, 85.1 (dd,  $J = 27.2, 12.1$  Hz), 45.6 (dd,  $J = 4.5, 1.5$  Hz), 29.2 (d,  $J = 1.5$  Hz).  $^{19}\text{F}$  NMR (565 MHz, DMSO)  $\delta$  -4.75 (d,  $J = 39.6$  Hz), -8.16 (d,  $J = 39.6$  Hz). HRMS (ESI)  $m/z$  Calcd for  $\text{C}_{19}\text{H}_{12}\text{Cl}_2\text{F}_2\text{NO}$   $[\text{M}+\text{H}]^+$ : 378.0264; Found: 378.0259.

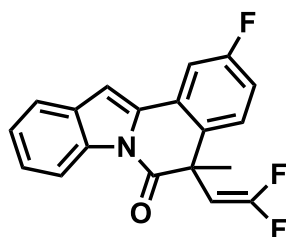

**5-(2,2-difluorovinyl)-2-fluoro-5-methylindolo[2,1-*a*]isoquinolin-6(5*H*)-one (3h)**:

Eluent: petroleum ether/EtOAc = 20:1 to 5:1 (v/v). New compound. 46.4 mg, 71% yield. Yellow oil.  $^1\text{H NMR}$  (800 MHz,  $\text{CDCl}_3$ )  $\delta$  8.77 (d,  $J = 8.0$  Hz, 1H), 7.85 (d,  $J = 8.0$  Hz, 1H), 7.72 (dd,  $J = 9.6, 2.4$  Hz, 1H), 7.65 – 7.63 (m, 1H), 7.61 (dd,  $J = 8.8, 5.6$  Hz, 1H), 7.58 (t,  $J = 7.2$  Hz, 1H), 7.31 (td,  $J = 8.8, 3.2$  Hz, 1H), 4.97 (dd,  $J = 25.6, 3.2$  Hz, 1H), 2.05 (s, 3H).  $^{13}\text{C NMR}$  (201 MHz,  $\text{CDCl}_3$ )  $\delta$  170.8, 162.2 (d,  $J = 247.2$  Hz), 156.7 (dd,  $J = 295.5, 289.4$  Hz), 135.6, 134.3, 134.1 (d,  $J = 2.0$  Hz), 130.5, 129.5 (d,  $J = 8.0$  Hz), 126.1, 125.6 (d,  $J = 8.0$  Hz), 125.0, 121.0, 116.8, 116.6 (d,  $J = 22.1$  Hz), 110.0 (d,  $J = 24.12$  Hz), 104.7, 84.5 (dd,  $J = 28.1, 14.1$  Hz), 45.8 (dd,  $J = 6.0, 4.0$  Hz), 30.3 (d,  $J = 2.0$  Hz).  $^{19}\text{F NMR}$  (565 MHz, DMSO)  $\delta$  -5.99(d,  $J = 45.2$  Hz), -6.42(d,  $J = 45.2$  Hz), -36.25. **HRMS** (ESI)  $m/z$  Calcd for  $\text{C}_{20}\text{H}_{16}\text{F}_2\text{NO}$   $[\text{M}+\text{H}]^+$ : 328.0949; Found: 328.0944.

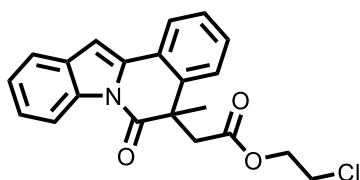

**2-chloroethyl 2-(5-methyl-6-oxo-5,6-dihydroindolo[2,1-a]isoquinolin-5-yl)acetate(4a):** petroleum ether/EtOAc = 20:1 to 5:1 (v/v). New compound. 62.6 mg, 85% yield. Yellow solid. Melting point: 88.3 – 89.0 °C.  $^1\text{H NMR}$  (600 MHz,  $\text{CDCl}_3$ )  $\delta$  8.63 – 8.57 (m, 1H), 7.89 – 7.87 (m, 1H), 7.61 (d,  $J = 7.8$  Hz, 1H), 7.39 – 7.32 (m, 5H), 7.07 (s, 1H), 4.05 – 3.99 (m, 2H), 3.79 (d,  $J = 16.8$  Hz, 1H), 3.26 (t,  $J = 6.0$  Hz, 2H), 3.19 (d,  $J = 17.4$  Hz, 1H), 1.64 (s, 3H).  $^{13}\text{C NMR}$  (151 MHz,  $\text{CDCl}_3$ )  $\delta$  172.5, 169.9, 137.7, 135.6, 153.5, 130.7, 129.1, 127.7, 125.4, 125.3, 124.8, 124.7, 124.2, 120.6, 116.8, 103.3, 64.2, 46.4, 44.2, 41.0, 30.4. **HRMS** (ESI)  $m/z$  Calcd for  $\text{C}_{21}\text{H}_{19}\text{ClINO}_3$   $[\text{M}+\text{H}]^+$ : 368.1054; Found: 368.1048.

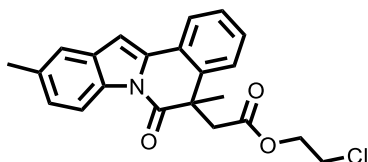

**2-chloroethyl 2-(5,11-dimethyl-6-oxo-5,6-dihydroindolo[2,1-a]isoquinolin-5-yl)acetate(4b):** petroleum ether/EtOAc = 20:1 to 5:1 (v/v). New compound. 54.2 mg, 71% yield. Yellow oil.  $^1\text{H NMR}$  (800 MHz,  $\text{CDCl}_3$ )  $\delta$  8.43 (d,  $J = 8.8$  Hz, 1H), 7.86 (dd,  $J = 5.6, 3.2$  Hz, 1H), 7.39 (s, 1H), 7.36 – 7.33 (m, 3H), 7.19 (dd,  $J = 8.8, 1.6$  Hz,

1H), 6.99 (s, 1H), 4.04 – 3.97 (m, 2H), 3.78 (d,  $J = 17.6$  Hz, 1H), 3.24 (td,  $J = 6.4, 1.6$  Hz, 2H), 3.17 (d,  $J = 16.8$  Hz, 1H), 2.47 (s, 3H), 1.63 (s, 3H).  $^{13}\text{C}$  NMR (201 MHz,  $\text{CDCl}_3$ )  $\delta$  172.3, 170.0, 137.6, 135.5, 134.3, 133.8, 131.0, 129.0, 127.6, 126.7, 125.3, 124.9, 124.1, 120.6, 116.4, 103.2, 64.2, 46.3, 44.1, 41.0, 30.4, 21.6. HRMS (ESI)  $m/z$  Calcd for  $\text{C}_{22}\text{H}_{21}\text{ClNO}_3$   $[\text{M}+\text{H}]^+$ : 382.1210; Found: 382.1205.

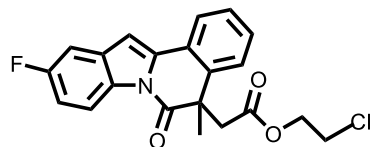

**propyl 2-(10-fluoro-5-methyl-6-oxo-5,6-dihydroindolo[2,1-*a*]isoquinolin-5-yl)acetate (4c):** petroleum ether/EtOAc = 20:1 to 5:1 (v/v). New compound. 55.4 mg, 76% yield. Yellow oil.  $^1\text{H}$  NMR (800 MHz,  $\text{CDCl}_3$ )  $\delta$  8.77 (dd,  $J = 8.9, 4.7$  Hz, 1H), 8.11 – 8.10 (m, 1H), 7.63 – 7.59 (m, 3H), 7.51 – 7.49 (m, 1H), 7.32 (td,  $J = 9.0, 2.6$  Hz, 1H), 4.27 (td,  $J = 5.5, 1.2$  Hz, 2H), 4.02 (d,  $J = 17.2$  Hz, 1H), 3.52 (t,  $J = 5.7$  Hz, 2H), 3.44 (d,  $J = 17.2$  Hz, 1H), 1.88 (s, 3H).  $^{13}\text{C}$  NMR (201 MHz,  $\text{CDCl}_3$ )  $\delta$  172.4, 170.0, 160.4 (d,  $J = 239.2$  Hz), 137.9, 137.1, 131.9 (d,  $J = 2.0$  Hz), 131.85, 129.4, 127.7, 125.4, 124.3 (d,  $J = 16.9$  Hz), 117.8 (d,  $J = 9.0$  Hz), 112.9, 112.8, 106.3, 106.2, 102.9 (d,  $J = 4.2$  Hz), 64.3, 46.2, 44.2, 41.1, 30.4. HRMS (ESI)  $m/z$  Calcd for  $\text{C}_{21}\text{H}_{18}\text{ClFNO}_3$   $[\text{M}+\text{H}]^+$ : 386.0959; Found: 386.0954.

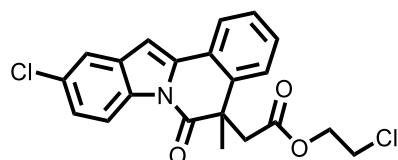

**2-chloroethyl 2-(10-chloro-5-methyl-6-oxo-5,6-dihydroindolo[2,1-*a*]isoquinolin-5-yl)acetate (4d):** petroleum ether/EtOAc = 20:1 to 5:1 (v/v). New compound. 66.8 mg, 83% yield. Yellow oil.  $^1\text{H}$  NMR (800 MHz,  $\text{CDCl}_3$ )  $\delta$  8.49 (d,  $J = 8.8$  Hz, 1H), 7.86 (dd,  $J = 7.2, 0.8$  Hz, 1H), 7.56 (d,  $J = 2.4$  Hz, 1H), 7.40 – 7.34 (m, 3H), 7.31 (dd,  $J = 8.0, 1.6$  Hz, 1H), 6.99 (s, 1H), 4.04 – 4.01 (m, 2H), 3.77 (d,  $J = 16.8$  Hz, 1H), 3.28 (t,  $J = 6.4$  Hz, 2H), 3.19 (d,  $J = 17.6$  Hz, 1H), 1.63 (s, 3H).  $^{13}\text{C}$  NMR (201 MHz,  $\text{CDCl}_3$ )  $\delta$  172.5, 170.0, 137.8, 136.8, 133.9, 132.0, 130.2, 129.5, 127.8, 125.4, 125.3, 124.4, 124.3, 120.2, 117.8, 102.4, 64.3, 46.3, 44.2, 41.1, 30.4. HRMS (ESI)  $m/z$  Calcd for  $\text{C}_{21}\text{H}_{18}\text{Cl}_2\text{NO}_3$   $[\text{M}+\text{H}]^+$ : 402.0663; Found: 402.0658.

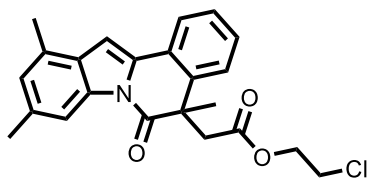

**2-chloroethyl 2-(5,9,11-trimethyl-6-oxo-5,6-dihydroindolo[2,1-a]isoquinolin-5-yl)acetate (4e):** petroleum ether/EtOAc = 20:1 to 5:1 (v/v). New compound. 58.6 mg, 74% yield. Yellow oil.  $^1\text{H NMR}$  (800 MHz,  $\text{CDCl}_3$ )  $\delta$  8.27 (s, 1H), 7.89 (dd,  $J = 6.6$ , 2.0 Hz, 1H), 7.36 – 7.32 (m, 3H), 7.08 (s, 1H), 6.99 (s, 1H), 4.06 – 3.99 (m, 2H), 3.79 (d,  $J = 17.2$  Hz, 1H), 3.29 – 3.24 (m, 2H), 3.18 (d,  $J = 17.2$  Hz, 1H), 2.56 (s, 3H), 2.49 (s, 3H), 1.63 (s, 3H).  $^{13}\text{C NMR}$  (201 MHz,  $\text{CDCl}_3$ )  $\delta$  172.6, 170.0, 137.3, 135.7, 134.3, 129.6, 128.6, 128.0, 127.5, 126.6, 125.3, 125.0, 123.9, 114.6, 101.9, 64.1, 46.3, 44.1, 41.0, 30.4, 22.0, 18.6. **HRMS** (ESI)  $m/z$  Calcd for  $\text{C}_{23}\text{H}_{23}\text{ClNO}_3$   $[\text{M}+\text{H}]^+$ : 396.1367; Found: 396.1361.

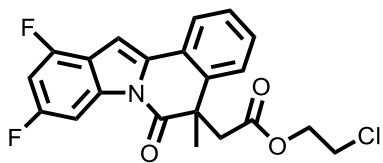

**2-chloroethyl 2-(9,11-difluoro-5-methyl-6-oxo-5,6-dihydroindolo[2,1-a]isoquinolin-5-yl)acetate (4f):** petroleum ether/EtOAc = 20:1 to 5:1 (v/v). New compound. 43.6 mg, 54% yield. Yellow solid. Melting point: 110.0 – 111.1 °C.  $^1\text{H NMR}$  (800 MHz,  $\text{CDCl}_3$ )  $\delta$  8.14 (dd,  $J = 8.8$ , 1.6 Hz, 1H), 7.87 – 7.86 (m, 1H), 7.40 – 7.34 (m, 3H), 7.10 (s, 1H), 6.83 (td,  $J = 9.6$ , 2.4 Hz, 1H), 4.04 (t,  $J = 5.6$  Hz, 2H), 3.76 (d,  $J = 17.6$  Hz, 1H), 3.31 (t,  $J = 5.6$  Hz, 2H), 3.21 (d,  $J = 17.6$  Hz, 1H), 1.64 (s, 3H).  $^{13}\text{C NMR}$  (201 MHz,  $\text{CDCl}_3$ )  $\delta$  172.8, 170.0, 161.7 (d,  $J = 11.5$  Hz), 160.5 (d,  $J = 11.1$  Hz), 155.6 (d,  $J = 14.2$  Hz), 154.4 (d,  $J = 14.4$  Hz), 137.5, 136.6 (d,  $J = 15.4$  Hz), 135.8 (d,  $J = 3.9$  Hz), 129.5, 127.9, 125.4, 124.3, 124.1, 116.0 (d,  $J = 20.0$  Hz), 100.8 (d,  $J = 4.2$  Hz), 100.6 (d,  $J = 4.3$  Hz), 100.2, 100.0 (d,  $J = 5.7$  Hz), 99.9, 98.3, 64.4, 46.4, 44.3, 41.1, 30.4, 29.8. **HRMS** (ESI)  $m/z$  Calcd for  $\text{C}_{21}\text{H}_{17}\text{ClF}_2\text{NO}_3$   $[\text{M}+\text{H}]^+$ : 404.0865; Found: 404.0860.



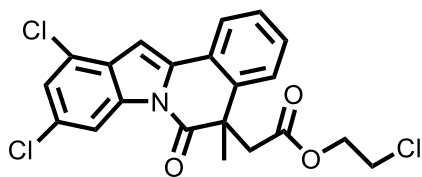

**2-chloroethyl**                      **2-(9,11-dichloro-5-methyl-6-oxo-5,6-dihydroindolo[2,1-*a*]isoquinolin-5-yl)acetate (4g):** petroleum ether/EtOAc = 20:1 to 5:1 (v/v). New compound. 52.4 mg, 60% yield. Yellow solid. Melting point: 131.2 – 132.3 °C. **<sup>1</sup>H NMR** (800 MHz, CDCl<sub>3</sub>) δ 8.54 – 8.53 (m, 1H), 7.90 (dd, *J* = 5.4, 0.8 Hz, 1H), 7.41 – 7.36 (m, 2H), 7.35 (dd, *J* = 8.0, 1.6 Hz, 1H), 7.33 (d, *J* = 1.6 Hz, 1H), 7.12 (s, 1H), 4.04 (td, *J* = 5.6, 3.2 Hz, 2H), 3.76 (d, *J* = 16.8 Hz, 1H), 3.32 (t, *J* = 5.6 Hz, 2H), 3.21 (d, *J* = 17.6 Hz, 1H), 1.63 (s, 3H). **<sup>13</sup>C NMR** (201 MHz, CDCl<sub>3</sub>) δ 172.8, 170.0, 137.7, 136.7, 135.8, 131.0, 129.8, 128.3, 127.9, 126.1, 125.4, 124.7, 124.5, 124.0, 115.7, 100.9, 64.4, 46.4, 44.2, 41.1, 30.3. **HRMS** (ESI) *m/z* Calcd for C<sub>21</sub>H<sub>17</sub>Cl<sub>3</sub>NO<sub>3</sub> [M+H]<sup>+</sup>: 436.0274; Found: 436.0269.

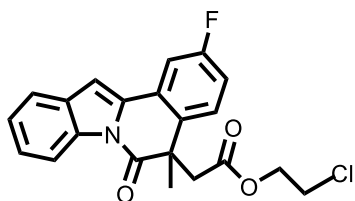

**propyl**                              **2-(2-fluoro-5-methyl-6-oxo-5,6-dihydroindolo[2,1-*a*]isoquinolin-5-yl)acetate(4h):** petroleum ether/EtOAc = 20:1 to 5:1 (v/v). New compound. 40.2 mg, 55% yield. Yellow oil. **<sup>1</sup>H NMR** (800 MHz, CDCl<sub>3</sub>) δ 8.57 (d, *J* = 8.0 Hz, 1H), 7.62 (d, *J* = 8.0 Hz, 1H), 7.53 (dd, *J* = 8.8, 2.4 Hz, 1H), 7.40 (td, *J* = 7.2, 0.8 Hz, 1H), 7.36 – 7.33 (m, 1H), 7.31 (dd, *J* = 8.8, 5.6 Hz, 1H), 7.07 (dd, *J* = 8.0, 2.4 Hz, 1H), 7.05 (s, 1H), 4.05 – 4.02 (m, 2H), 3.79 (d, *J* = 17.6 Hz, 1H), 3.31 – (m, 2H), 3.15 (d, *J* = 17.6 Hz, 1H), 1.62 (s, 3H). **<sup>13</sup>C NMR** (201 MHz, CDCl<sub>3</sub>) δ 172.2, 169.9, 161.9 (d, *J* = 245.2 Hz), 135.6, 134.4 (d, *J* = 2.9 Hz), 133.5 (d, *J* = 2.4 Hz), 130.4, 127.4 (d, *J* = 8.6 Hz), 126.7, 125.8, 124.8, 120.9, 116.8, 110.4, 110.3, 104.4, 64.3, 46.1, 44.3, 41.1, 30.4. **HRMS** (ESI) *m/z* Calcd for C<sub>21</sub>H<sub>18</sub>ClFNO<sub>3</sub> [M+H]<sup>+</sup>: 386.0959; Found: 386.0954.

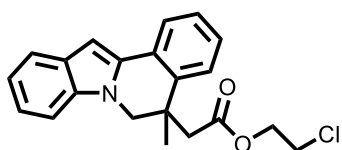

**propyl 2-(5-methyl-5,6-dihydroindolo[2,1-a]isoquinolin-5-yl)acetate(4i):**

petroleum ether/EtOAc = 20:1 to 5:1 (v/v). New compound. 44.6 mg, 67% yield. Yellow oil.  $^1\text{H NMR}$  (800 MHz,  $\text{CDCl}_3$ )  $\delta$  8.16 (d,  $J = 8.0$  Hz, 1H), 8.02 (d,  $J = 8.0$  Hz, 1H), 7.78 (dd,  $J = 14.7, 7.2$  Hz, 2H), 7.71 (td,  $J = 7.2, 0.8$  Hz, 1H), 7.67 (td,  $J = 8.0, 1.6$  Hz, 1H), 7.61 – 7.59 (m, 1H), 7.50 – 7.48 (m, 1H), 5.01 (d,  $J = 12.0$  Hz, 1H), 4.59 – 4.56 (m, 1H), 4.51 – 4.48 (m, 1H), 4.24 (d,  $J = 12.0$  Hz, 1H), 3.92 – 3.86 (m, 2H), 2.93 (d,  $J = 14.4$  Hz, 1H), 2.85 (d,  $J = 14.4$  Hz, 1H), 2.01 (s, 3H).  $^{13}\text{C NMR}$  (201 MHz,  $\text{CDCl}_3$ )  $\delta$  170.6, 138.8, 137.0, 135.0, 128.8, 128.1, 128.0, 127.8, 124.9, 124.9, 122.0, 120.9, 120.1, 109.2, 97.0, 64.1, 49.3, 43.0, 41.5, 37.9, 22.9. **HRMS** (ESI)  $m/z$  Calcd for  $\text{C}_{21}\text{H}_{21}\text{ClNO}_2$   $[\text{M}+\text{H}]^+$ : 354.1261; Found: 354.1255.

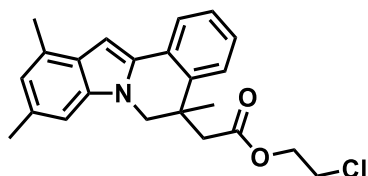

**2-chloroethyl 2-(5,9,11-trimethyl-5,6-dihydroindolo[2,1-a]isoquinolin-5-yl)acetate (4j):**

petroleum ether/EtOAc = 20:1 to 5:1 (v/v). New compound. 63.4 mg, 83% yield. Yellow oil.  $^1\text{H NMR}$  (800 MHz,  $\text{CDCl}_3$ )  $\delta$  7.82 (dd,  $J = 7.7, 1.1$  Hz, 1H), 7.43 (dd,  $J = 7.8, 0.6$  Hz, 1H), 7.36 (td,  $J = 7.2, 0.8$  Hz, 1H), 7.30 (td,  $J = 7.2, 0.8$  Hz, 1H), 7.09 (s, 1H), 6.89 (s, 1H), 6.81 (s, 1H), 4.61 (d,  $J = 12.0$  Hz, 1H), 4.26 – 4.23 (m, 1H), 4.19 – 4.14 (m, 1H), 3.85 (d,  $J = 12.0$  Hz, 1H), 3.60 – 3.53 (m, 2H), 2.60 (s, 3H), 2.58 (s, 1H), 2.52 (s, 1H), 2.51 (s, 3H), 1.66 (s, 3H).  $^{13}\text{C NMR}$  (201 MHz,  $\text{CDCl}_3$ )  $\delta$  170.7, 138.5, 137.2, 133.9, 132.1, 130.0, 128.4, 127.7, 127.6, 126.6, 124.9, 124.6, 122.3, 106.8, 95.4, 64.1, 49.4, 42.9, 41.5, 37.9, 22.8, 22.0, 18.8. **HRMS** (ESI)  $m/z$  Calcd for  $\text{C}_{23}\text{H}_{25}\text{ClNO}_3$   $[\text{M}+\text{H}]^+$ : 382.1574; Found: 382.1568.

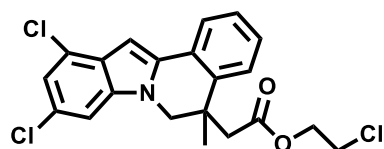

**2-chloroethyl 2-(9,11-dichloro-5-methyl-5,6-dihydroindolo[2,1-a]isoquinolin-5-yl)acetate (4k):**

petroleum ether/EtOAc = 20:1 to 5:1 (v/v). New compound. 61.8 mg, 73% yield. Yellow oil.  $^1\text{H NMR}$  (800 MHz,  $\text{CDCl}_3$ )  $\delta$  7.80 – 7.79 (m, 1H), 7.42 (dd,  $J$

= 7.2, 1.6 Hz, 1H), 7.35 (pd,  $J = 7.2, 1.6$  Hz, 2H), 7.31 (d,  $J = 0.8$  Hz, 1H), 7.12 (d,  $J = 1.6$  Hz, 1H), 6.92 (s, 1H), 4.58 (d,  $J = 12.0$  Hz, 1H), 4.28 – 4.26 (m, 1H), 4.21 – 4.18 (m, 1H), 3.82 (d,  $J = 12.0$  Hz, 1H), 3.59 (dt,  $J = 5.6, 4.8$  Hz, 2H), 2.49 (dd,  $J = 52.8, 14.4$  Hz, 2H), 1.62 (s, 3H).  $^{13}\text{C}$  NMR (201 MHz,  $\text{CDCl}_3$ )  $\delta$  170.4, 138.9, 137.5, 136.2, 128.8, 128.0, 127.6, 127.2, 126.4, 126.3, 125.2, 124.9, 120.3, 108.1, 95.7, 64.3, 49.4, 42.8, 41.6, 37.9, 22.7. HRMS (ESI)  $m/z$  Calcd for  $\text{C}_{21}\text{H}_{19}\text{Cl}_3\text{NO}_2$   $[\text{M}+\text{H}]^+$ : 422.0481; Found: 422.0476.

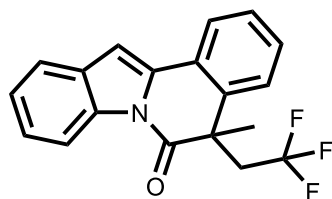

**5-methyl-5-(2,2,2-trifluoroethyl)indolo[2,1-*a*]isoquinolin-6(5*H*)-one (5a)** : petroleum ether/EtOAc = 100:1 to 50:1 (v/v). New compound. 62.5 mg, 76% yield. Yellow oil.  $^1\text{H}$  NMR (600 MHz,  $\text{CDCl}_3$ )  $\delta$  8.59 (d,  $J = 8.4$  Hz, 1H), 7.90 – 7.88 (m, 1H), 7.61 (d,  $J = 7.8$  Hz, 1H), 7.42 – 7.39 (m, 3H), 7.37 (dd,  $J = 14.5, 1.1$  Hz, 1H), 7.34 (dd,  $J = 7.4, 0.8$  Hz, 1H), 7.07 (s, 1H), 3.48 (dq,  $J = 15.2, 10.5$  Hz, 1H), 2.87 (dq,  $J = 15.3, 9.8$  Hz, 1H), 1.73 (s, 3H).  $^{13}\text{C}$  NMR (151 MHz,  $\text{CDCl}_3$ )  $\delta$  171.0, 135.5, 135.3, 135.1, 130.8, 128.8, 128.0, 126.8, 125.6, 125.3(q,  $J = 279.4$  Hz), 125.0, 124.4, 124.3, 124.1, 120.7, 116.9, 103.8, 44.9 (q,  $J = 1.5$  Hz), 43.9 (q,  $J = 27.2$  Hz), 31.0.  $^{19}\text{F}$  NMR (565 MHz,  $\text{CDCl}_3$ )  $\delta$  16.56. HRMS (ESI)  $m/z$  Calcd for  $\text{C}_{19}\text{H}_{15}\text{F}_3\text{NO}$   $[\text{M}+\text{H}]^+$ : 330.1106; Found: 330.1100.

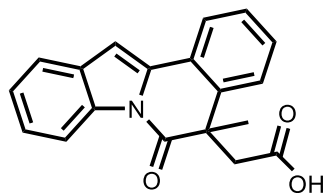

**2-(5-methyl-6-oxo-5,6-dihydroindolo[2,1-*a*]isoquinolin-5-yl)acetic acid (5b)**: petroleum ether/EtOAc = 10:1 to 5:1 (v/v). Known compound, 95.6 mg, 95% yield. Yellow oil.  $^1\text{H}$  NMR (600 MHz,  $\text{CDCl}_3$ )  $\delta$  9.62 (s, 1H), 8.52 (d,  $J = 8.0$  Hz, 1H), 7.78 – 7.76 (m, 1H), 7.57 – 7.55 (m, 1H), 7.36 – 7.33 (m, 1H), 7.31 – 7.30 (m, 1H), 7.29 – 7.27 (m, 2H), 7.24 (s, 1H), 7.22 – 7.19 (m, 1H), 6.96 (s, 1H), 3.66 (d,  $J = 17.7$  Hz, 1H),

3.04 (d,  $J = 17.6$  Hz, 1H), 1.50 (s, 3H).  $^{13}\text{C}$  NMR (151 MHz,  $\text{CDCl}_3$ )  $\delta$  176.0, 172.5, 137.5, 135.4, 130.7, 129.0, 127.5, 125.2, 124.9, 124.6, 124.5, 124.2, 120.5, 116.7, 103.2, 46.0, 43.2, 30.6.

## 5. X-Ray Crystallography Data of **3h** and **4a**

The suitable crystals were selected on a XtaLAB Synergy, Dualflex, HyPix diffractometer. The crystals were kept at 100.03(10) K during data collection. Using Olex2, the structures were solved with the ShelXT structure solution program using Intrinsic Phasing and refined with the ShelXL refinement package using Least Squares minimisation.

7. Dolomanov, O. V., Bourhis, L. J., Gildea, R. J., Howard, J. A. K. & Puschmann, H. J. Appl. Cryst. 2009, 42, 339-341.

8. Sheldrick, G. M. Acta Cryst. 2015, A71, 3-8.

9. Sheldrick, G. M. Acta Cryst. 2015, C71, 3-8.

Single-crystals suitable for X-ray diffraction analysis were grown from the recrystallization in dichloromethane and petroleum ether (1/1, v/v) at 25 °C. Thermal ellipsoids of the crystal structures of **3h** was set at 50%.

|                                  |                                                           |
|----------------------------------|-----------------------------------------------------------|
| Identification code              | CCDC 2323817                                              |
| Empirical formula                | $\text{C}_{20}\text{H}_{11}\text{Cl}_2\text{F}_2\text{O}$ |
| Formula weight                   | 376.19                                                    |
| Temperature/K                    | 296.15                                                    |
| Crystal system                   | triclinic                                                 |
| Space group                      | P-1                                                       |
| $a/\text{Å}$                     | 8.872(3)                                                  |
| $b/\text{Å}$                     | 10.069(3)                                                 |
| $c/\text{Å}$                     | 10.305(3)                                                 |
| $\alpha/^\circ$                  | 111.594(5)                                                |
| $\beta/^\circ$                   | 96.066(5)                                                 |
| $\gamma/^\circ$                  | 104.973(5)                                                |
| Volume/ $\text{Å}^3$             | 806.0(4)                                                  |
| Z                                | 2                                                         |
| $\rho_{\text{calc}}/\text{cm}^3$ | 1.550                                                     |
| $\mu/\text{mm}^{-1}$             | 0.429                                                     |

|                                                  |                                                                        |
|--------------------------------------------------|------------------------------------------------------------------------|
| F(000)                                           | 382.0                                                                  |
| Crystal size/mm <sup>3</sup>                     | 0.2 × 0.15 × 0.1                                                       |
| Radiation                                        | MoK $\alpha$ ( $\lambda$ = 0.71073)                                    |
| 2 $\theta$ range for data collection/ $^{\circ}$ | 4.862 to 52.74                                                         |
| Index ranges                                     | -11 $\leq$ h $\leq$ 11, -12 $\leq$ k $\leq$ 10, -12 $\leq$ l $\leq$ 12 |
| Reflections collected                            | 4542                                                                   |
| Independent reflections                          | 3236 [R <sub>int</sub> = 0.0198, R <sub>sigma</sub> = 0.0474]          |
| Data/restraints/parameters                       | 3236/0/227                                                             |
| Goodness-of-fit on F <sup>2</sup>                | 1.065                                                                  |
| Final R indexes [I $\geq$ 2 $\sigma$ (I)]        | R <sub>1</sub> = 0.0667, wR <sub>2</sub> = 0.1961                      |
| Final R indexes [all data]                       | R <sub>1</sub> = 0.0962, wR <sub>2</sub> = 0.2202                      |
| Largest diff. peak/hole / e $\text{\AA}^{-3}$    | 0.62/-0.40                                                             |

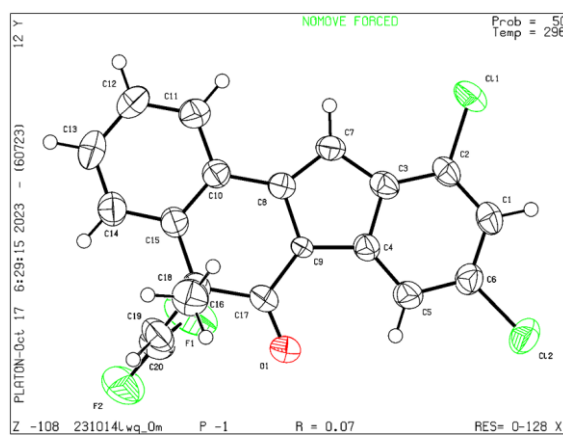

## X-Ray Crystallography Data of 4a

|                                       |                                                   |
|---------------------------------------|---------------------------------------------------|
| Identification code                   | CCDC 2323815                                      |
| Empirical formula                     | C <sub>21</sub> H <sub>18</sub> ClNO <sub>3</sub> |
| Formula weight                        | 367.81                                            |
| Temperature/K                         | 296.15                                            |
| Crystal system                        | monoclinic                                        |
| Space group                           | C2                                                |
| a/ $\text{\AA}$                       | 24.627(8)                                         |
| b/ $\text{\AA}$                       | 6.889(2)                                          |
| c/ $\text{\AA}$                       | 32.225(11)                                        |
| $\alpha$ / $^{\circ}$                 | 90                                                |
| $\beta$ / $^{\circ}$                  | 96.899(10)                                        |
| $\gamma$ / $^{\circ}$                 | 90                                                |
| Volume/ $\text{\AA}^3$                | 5427(3)                                           |
| Z                                     | 12                                                |
| $\rho_{\text{calc}}$ /cm <sup>3</sup> | 1.350                                             |
| $\mu$ /mm <sup>-1</sup>               | 0.232                                             |
| F(000)                                | 2304.0                                            |
| Crystal size/mm <sup>3</sup>          | ? × ? × ?                                         |

|                                                |                                                                  |
|------------------------------------------------|------------------------------------------------------------------|
| Radiation                                      | MoK $\alpha$ ( $\lambda = 0.71073$ )                             |
| 2 $\theta$ range for data collection/ $^\circ$ | 1.272 to 49.998                                                  |
| Index ranges                                   | $-23 \leq h \leq 29$ , $-7 \leq k \leq 8$ , $-38 \leq l \leq 38$ |
| Reflections collected                          | 13448                                                            |
| Independent reflections                        | 8455 [ $R_{\text{int}} = 0.0567$ , $R_{\text{sigma}} = 0.0864$ ] |
| Data/restraints/parameters                     | 8455/1/706                                                       |
| Goodness-of-fit on $F^2$                       | 1.070                                                            |
| Final R indexes [ $I > 2\sigma(I)$ ]           | $R_1 = 0.1045$ , $wR_2 = 0.2818$                                 |
| Final R indexes [all data]                     | $R_1 = 0.1205$ , $wR_2 = 0.2950$                                 |
| Largest diff. peak/hole / $e \text{ \AA}^{-3}$ | 0.77/-0.42                                                       |
| Flack parameter                                | 0.21(8)                                                          |

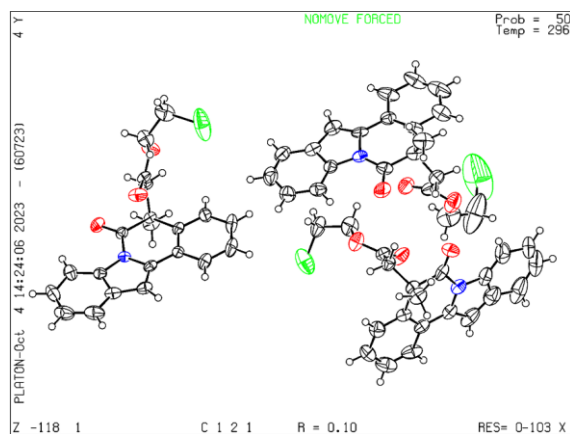

## 6. NMR Spectra

### <sup>1</sup>H NMR of product 3a in CDCl<sub>3</sub> (800 MHz)

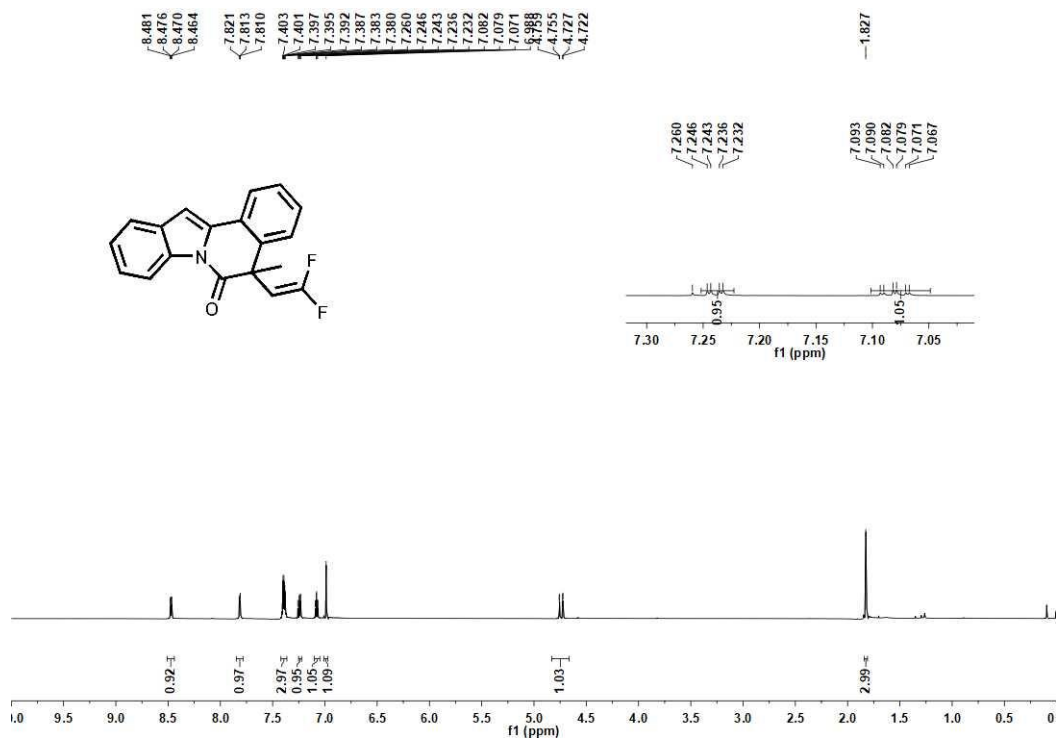

### <sup>13</sup>C NMR of product 3a in CDCl<sub>3</sub> (151 MHz)

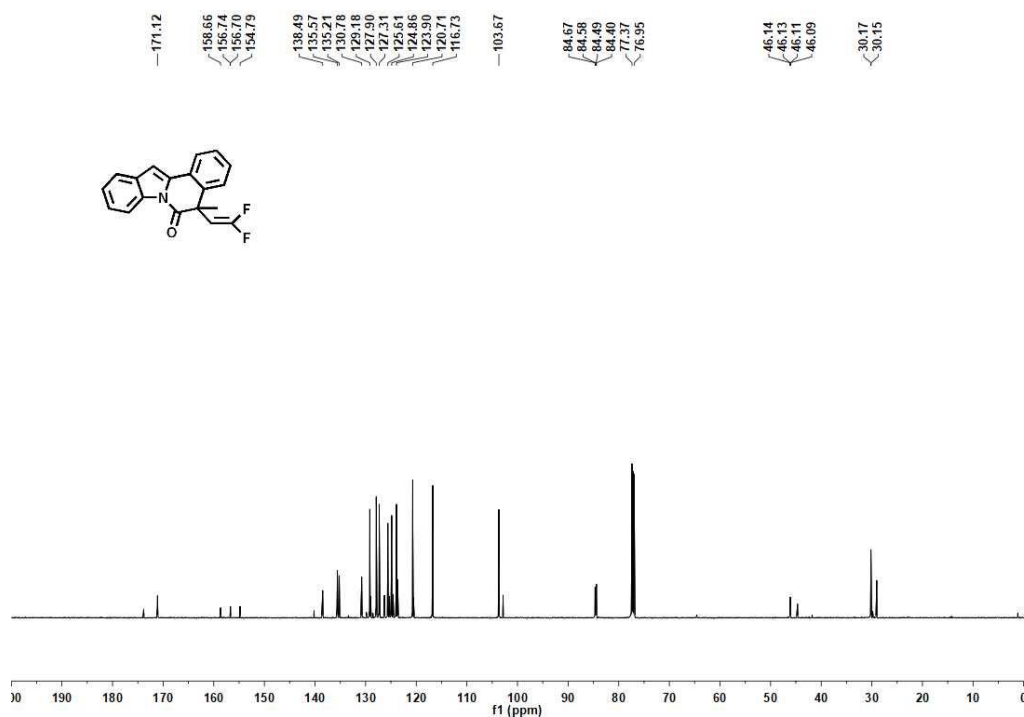

**<sup>19</sup>F NMR of product 3a in DMSO (565 MHz)**

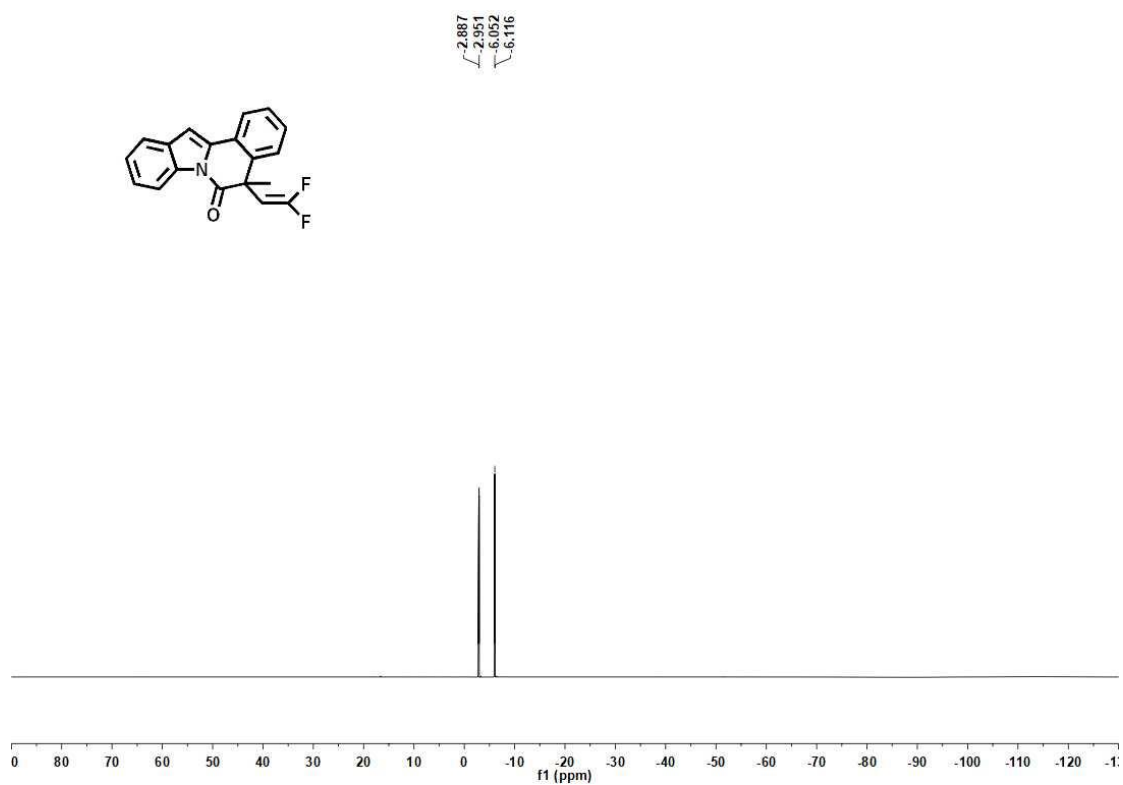

**<sup>1</sup>H NMR of product 3b in DMSO (600 MHz)**

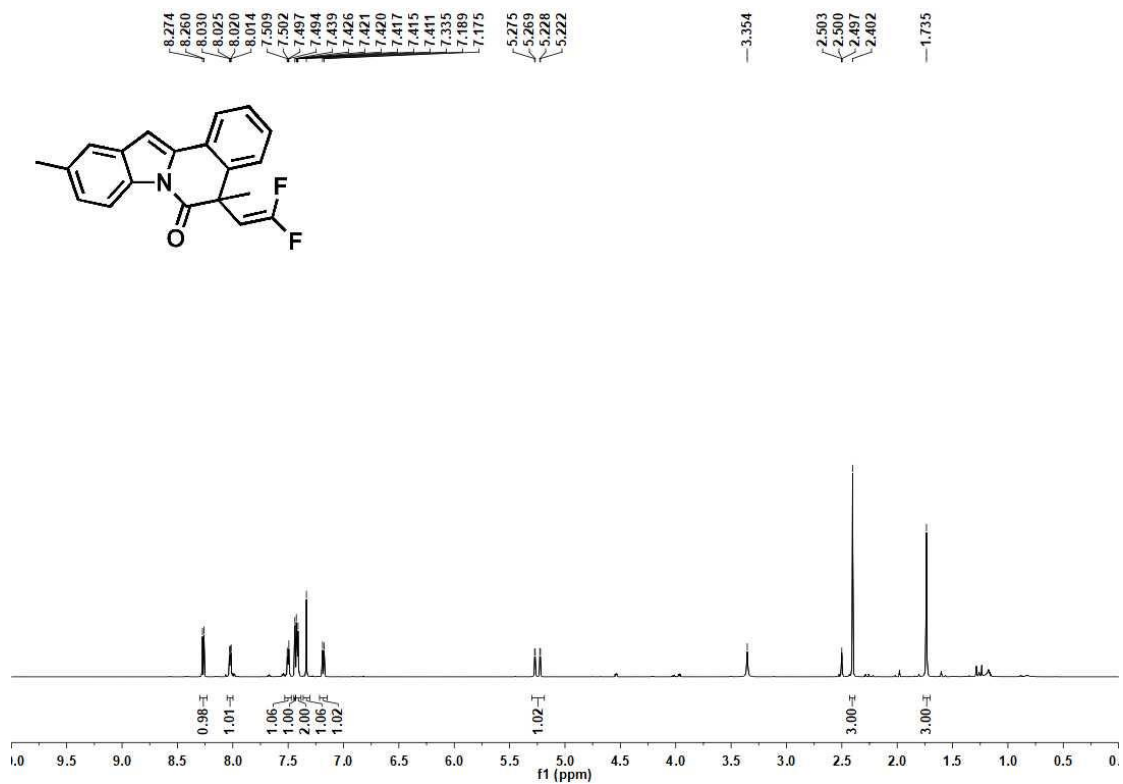



### <sup>13</sup>C NMR of product 3b in DMSO (151 MHz)

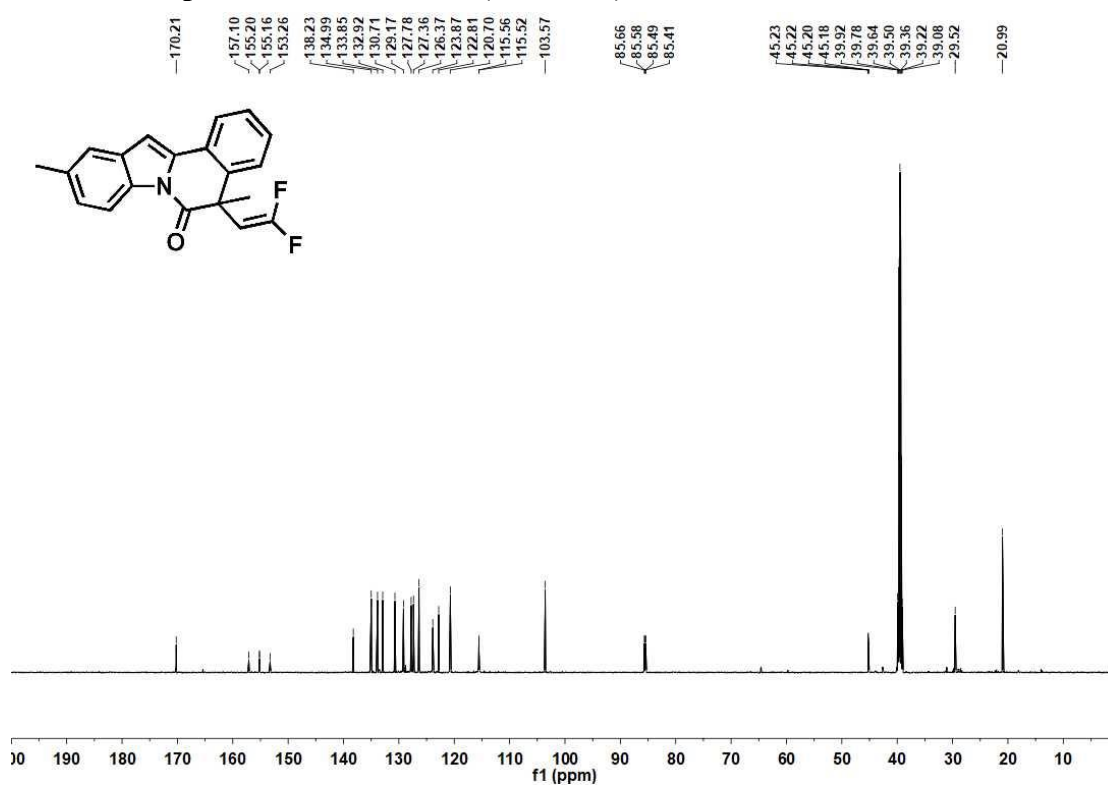

### <sup>19</sup>F NMR of product 3b in DMSO (565 MHz)

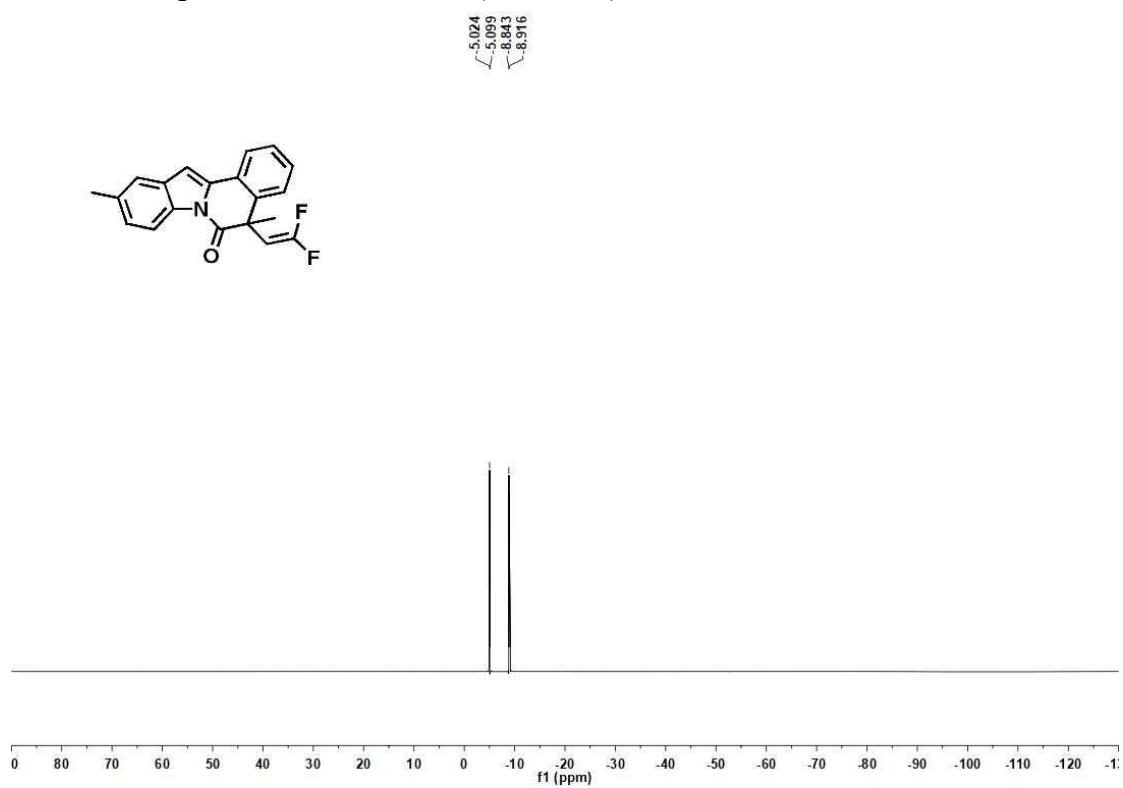

**<sup>1</sup>H NMR of product 3c in DMSO (600 MHz)**

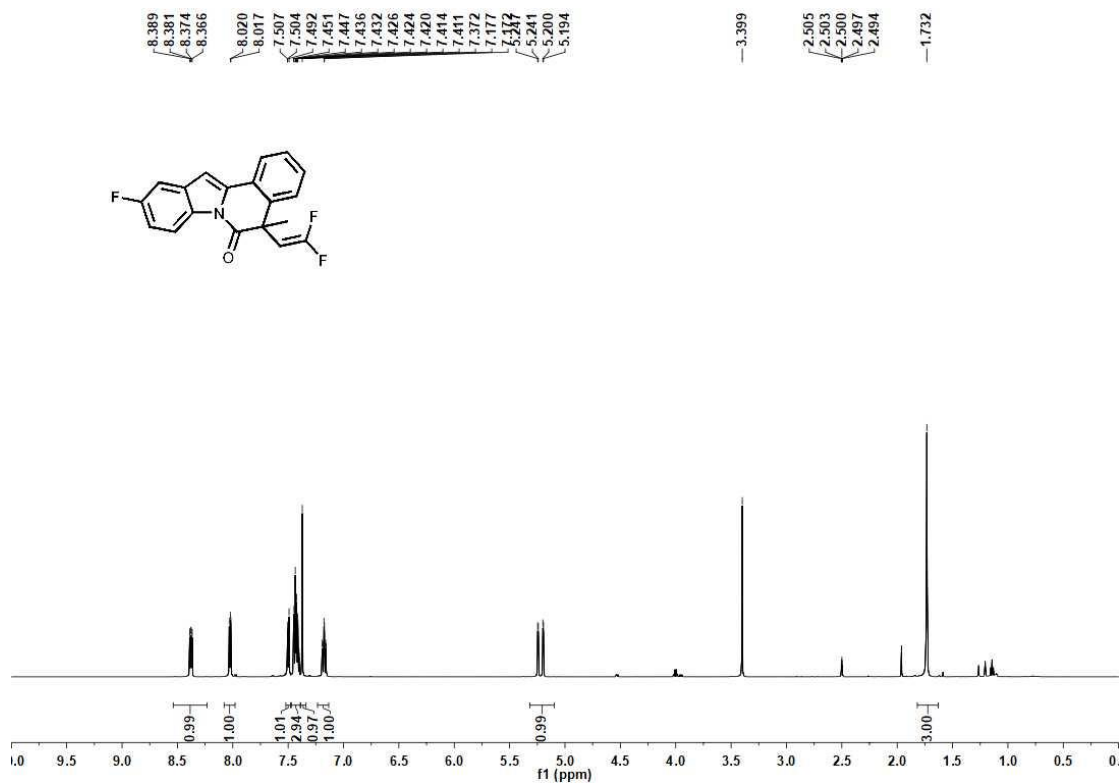

**<sup>13</sup>C NMR of product 3c in DMSO (151 MHz)**

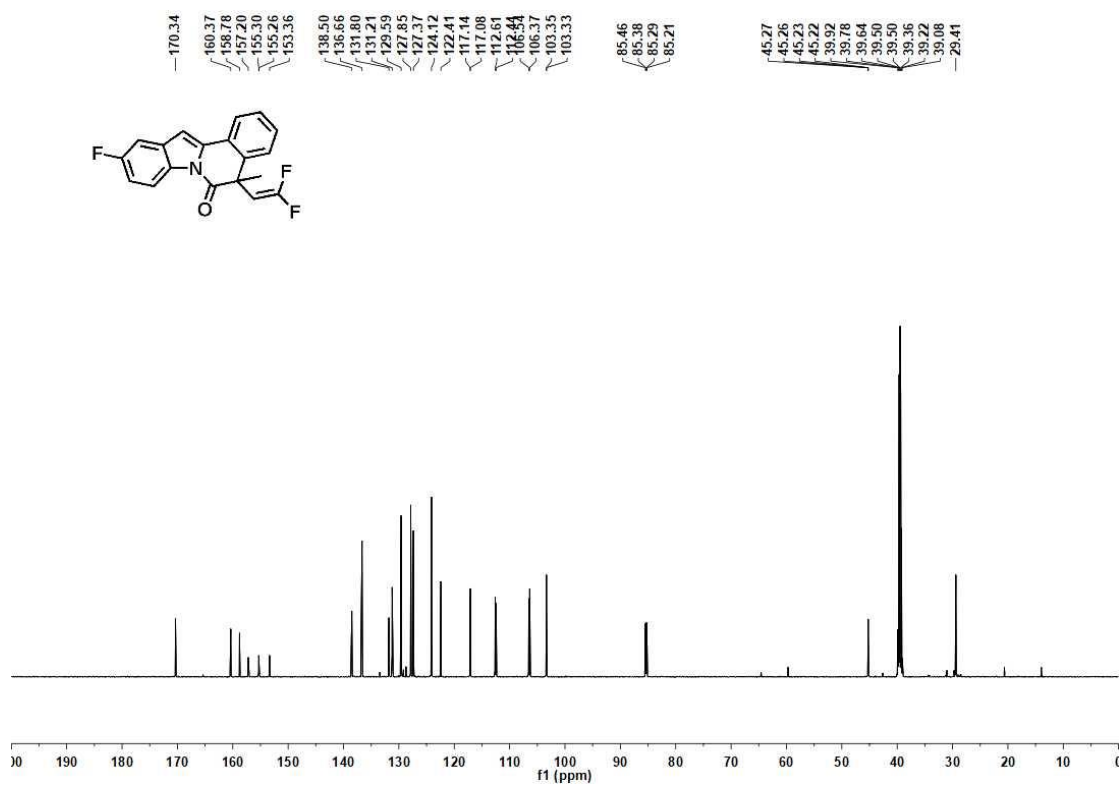

**$^{19}\text{F}$  NMR of product 3c in DMSO (565 MHz)**

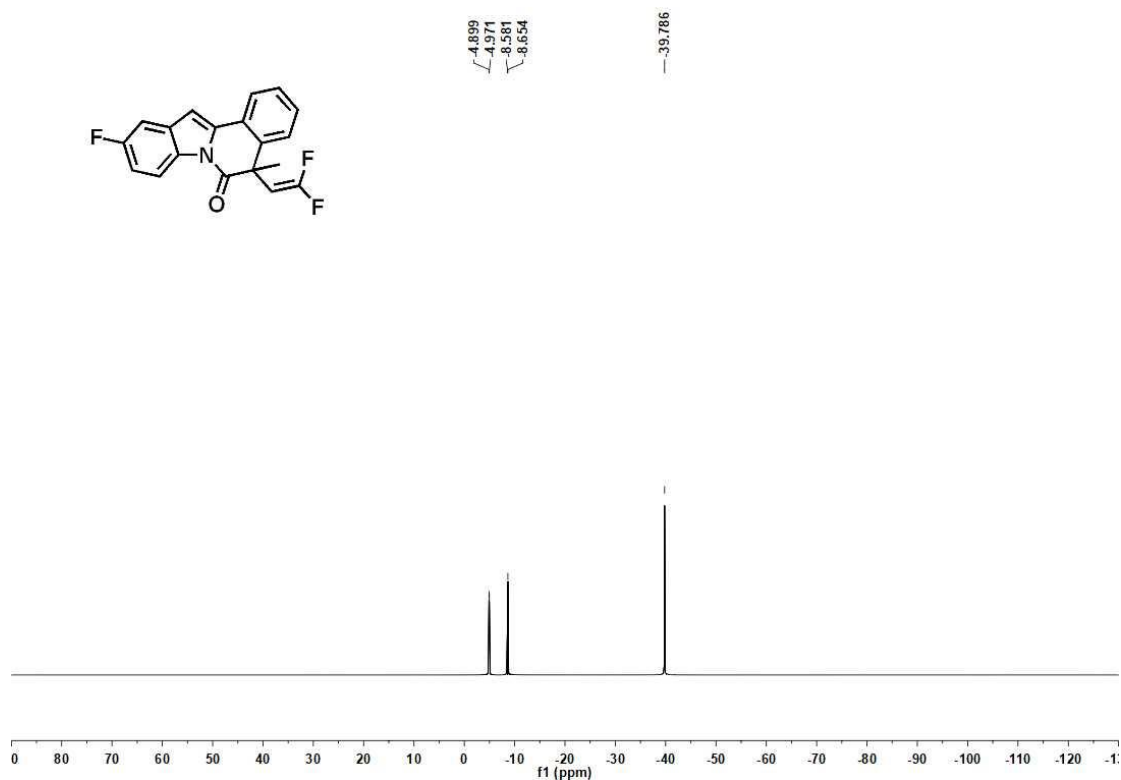

**$^1\text{H}$  NMR of product 3d in DMSO (600 MHz)**

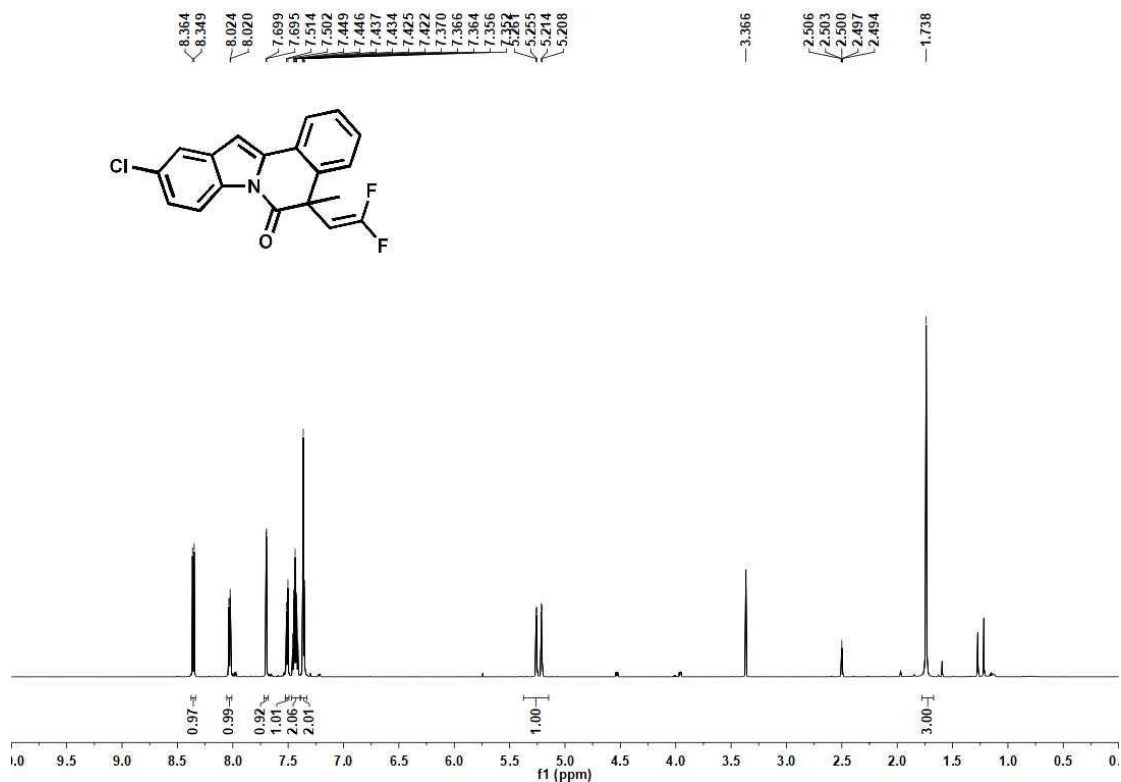

### <sup>13</sup>C NMR of product 3d in DMSO (151 MHz)

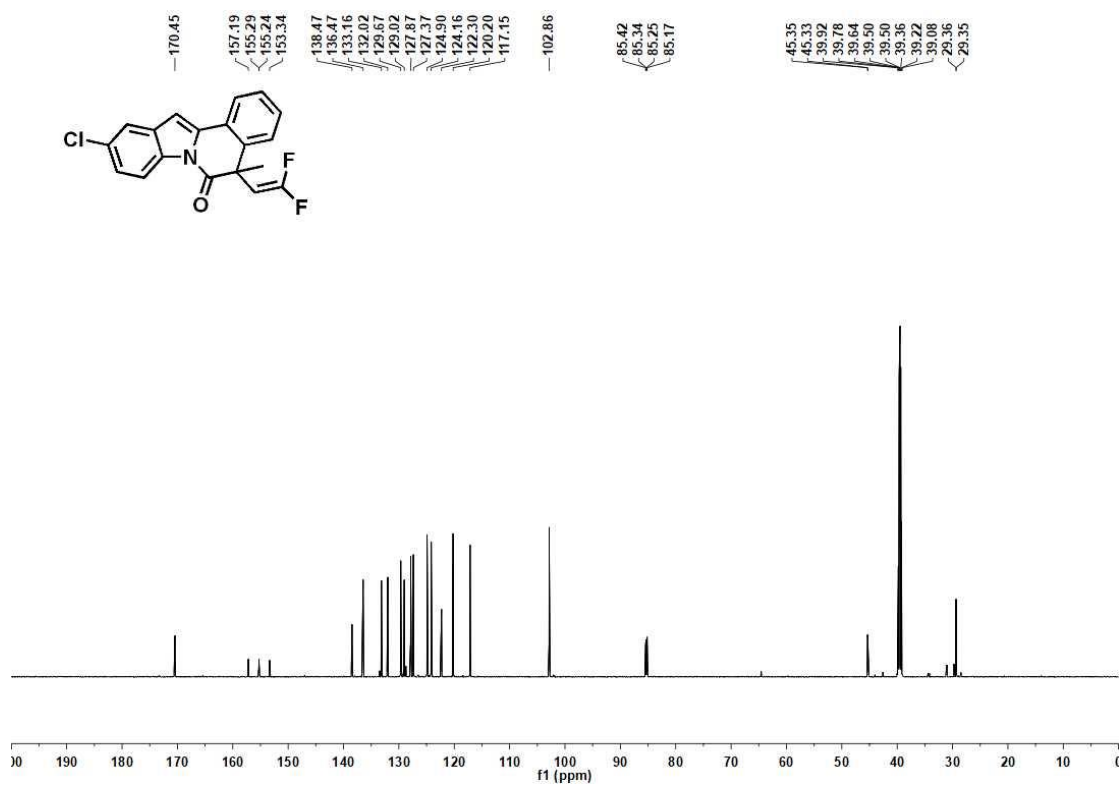

### <sup>19</sup>F NMR of product 3d in DMSO (565 MHz)

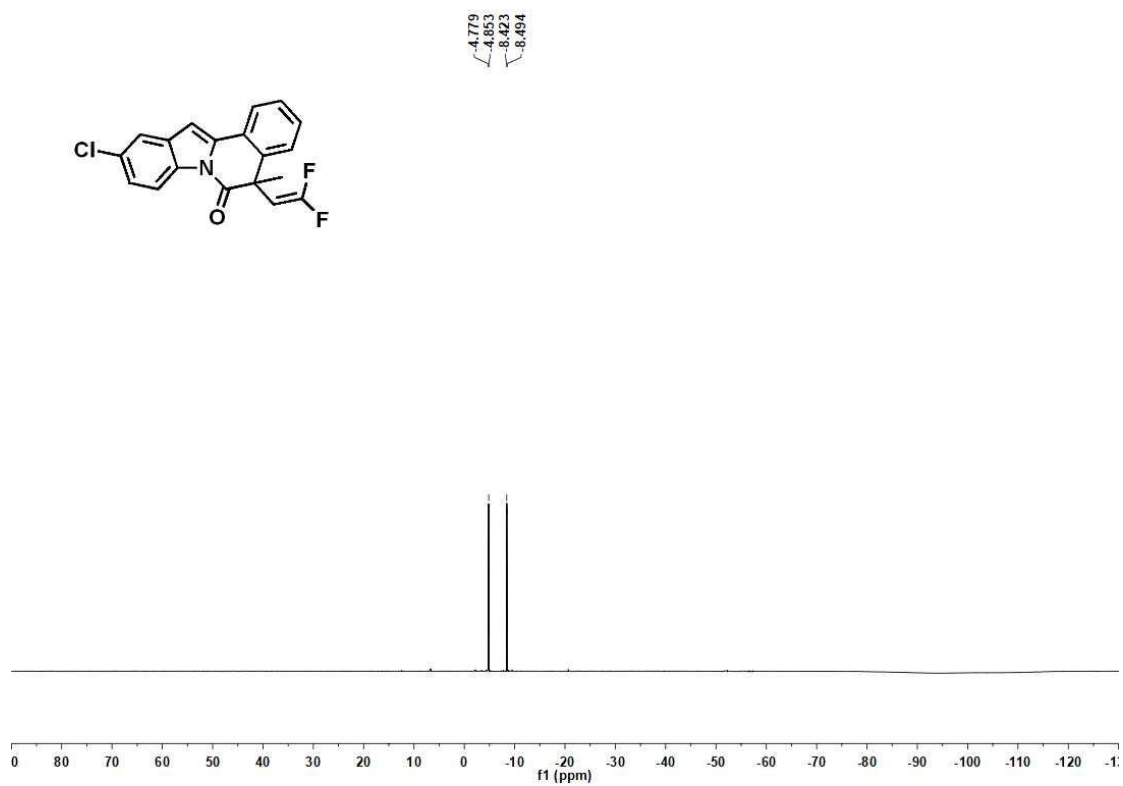

### $^1\text{H}$ NMR of product 3e in $\text{CDCl}_3$ (800 MHz)

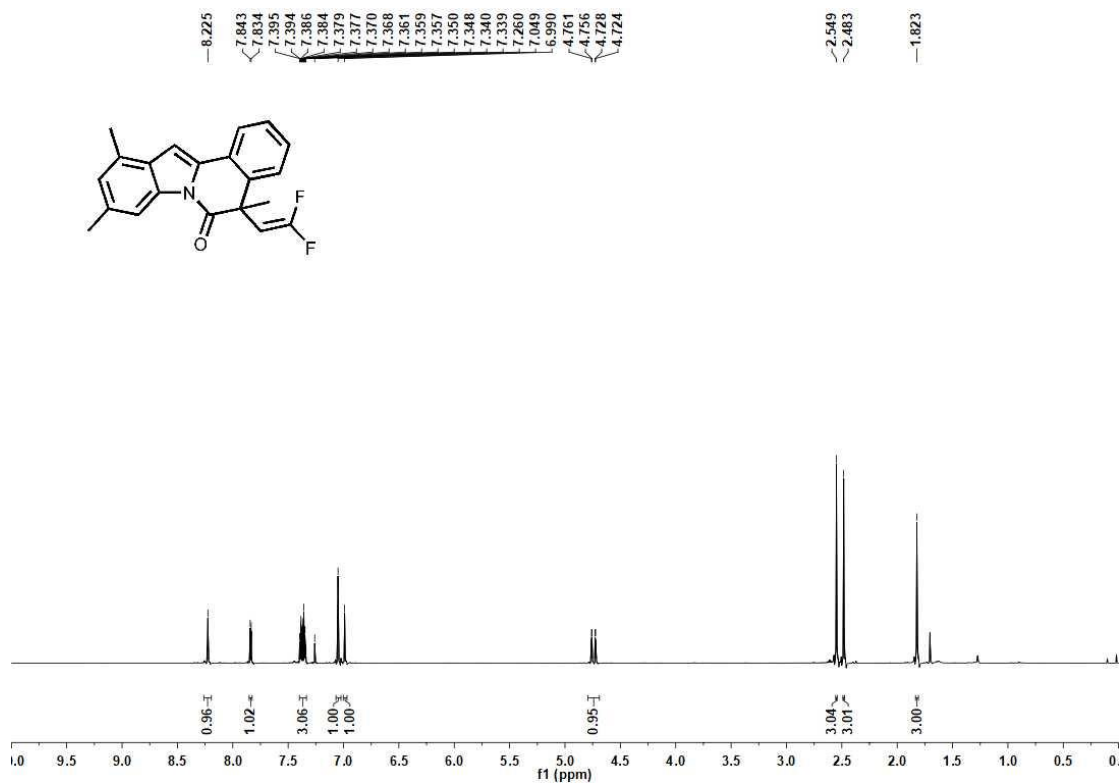

### $^{13}\text{C}$ NMR of product 3e in $\text{CDCl}_3$ (201 MHz)

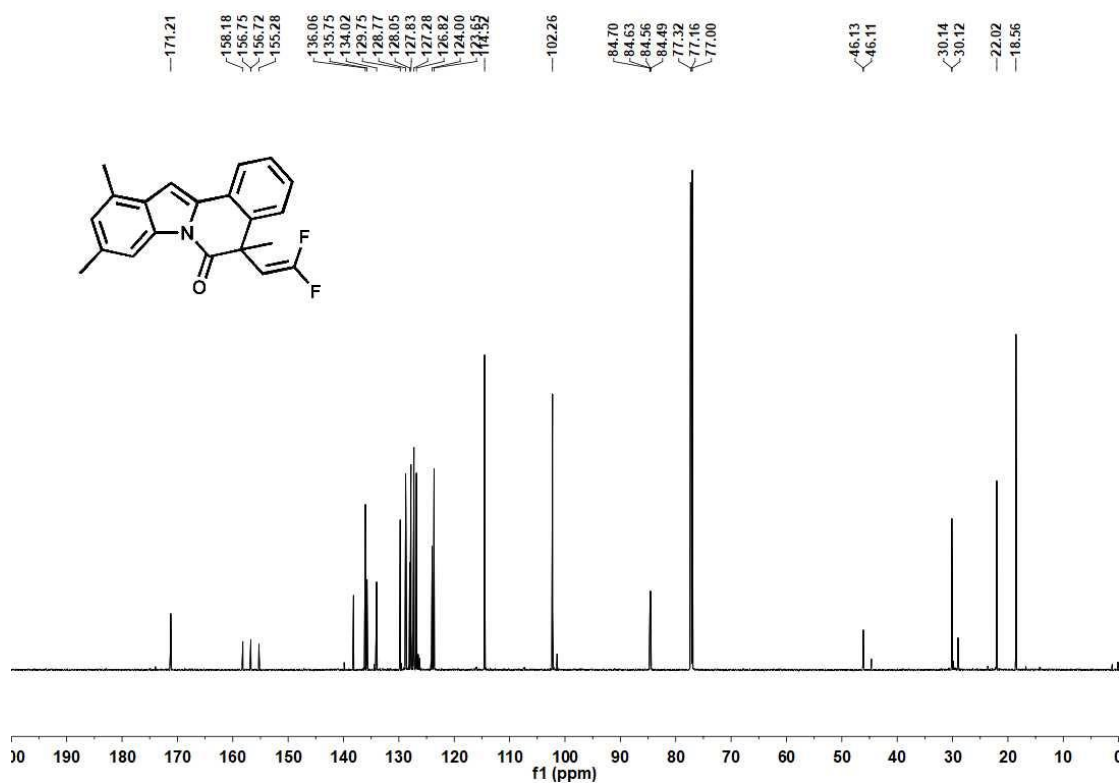

**<sup>19</sup>F NMR of product 3e in DMSO (565 MHz)**

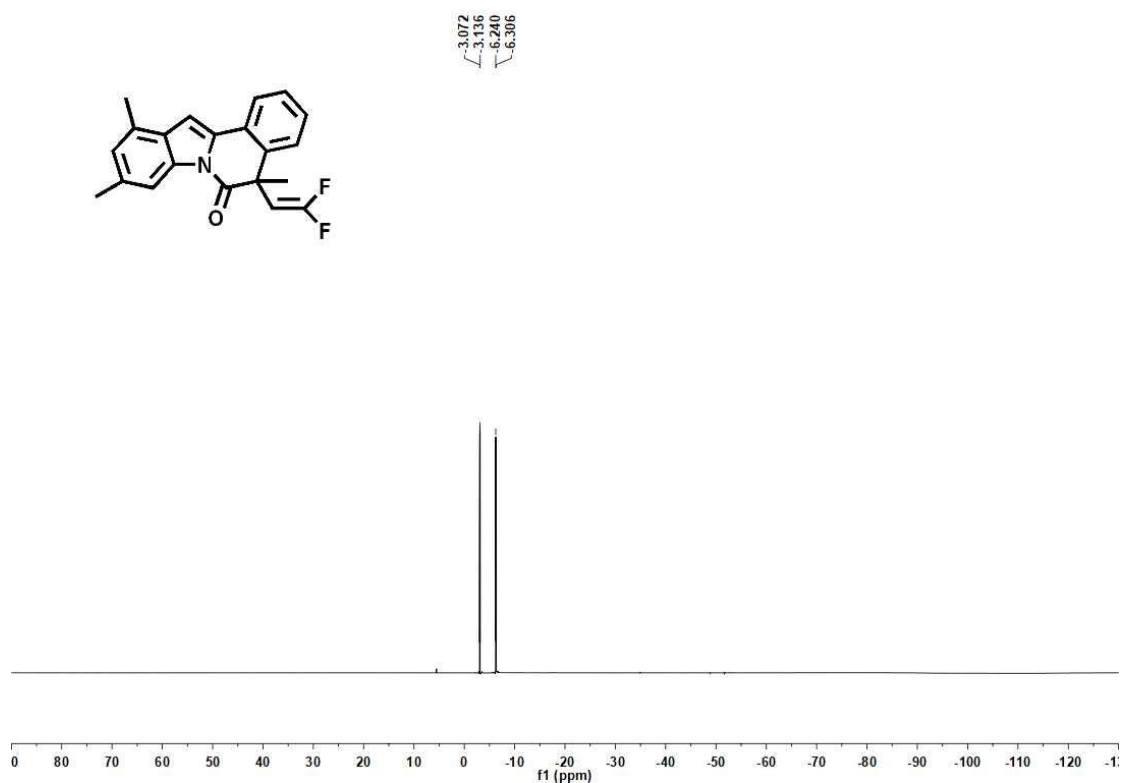

**<sup>1</sup>H NMR of product 3f in CDCl<sub>3</sub> (800 MHz)**

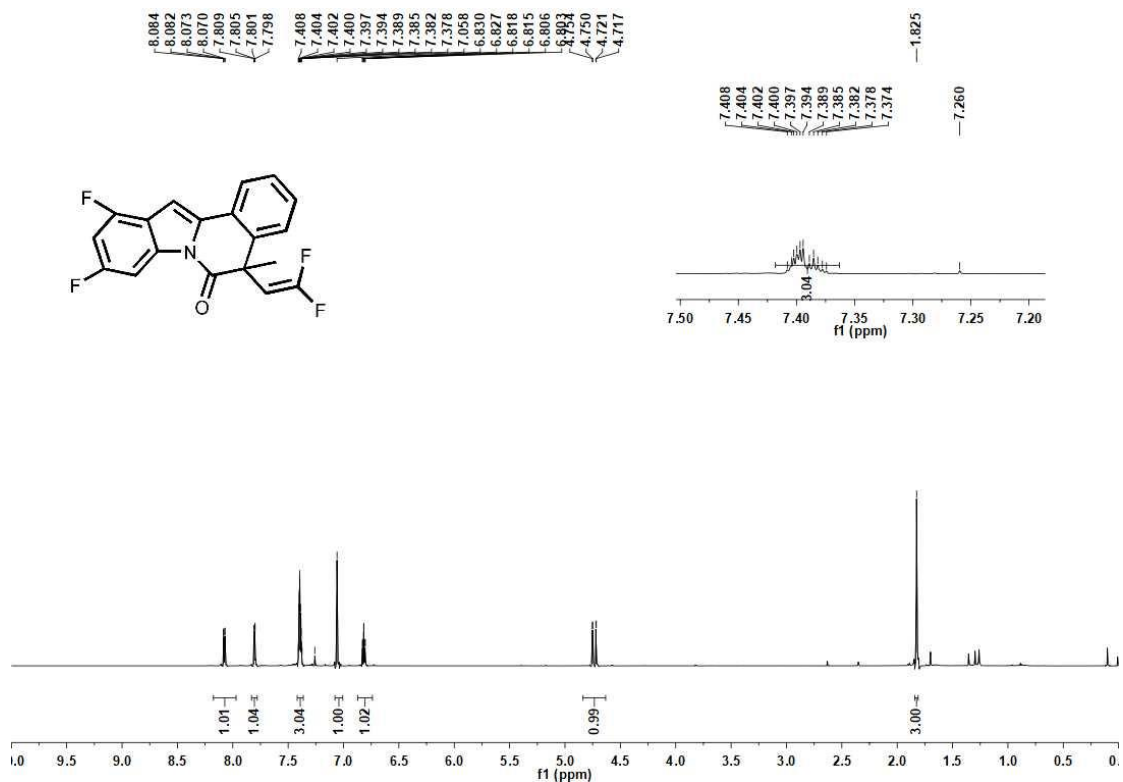

### <sup>13</sup>C NMR of product 3f in CDCl<sub>3</sub> (201 MHz)

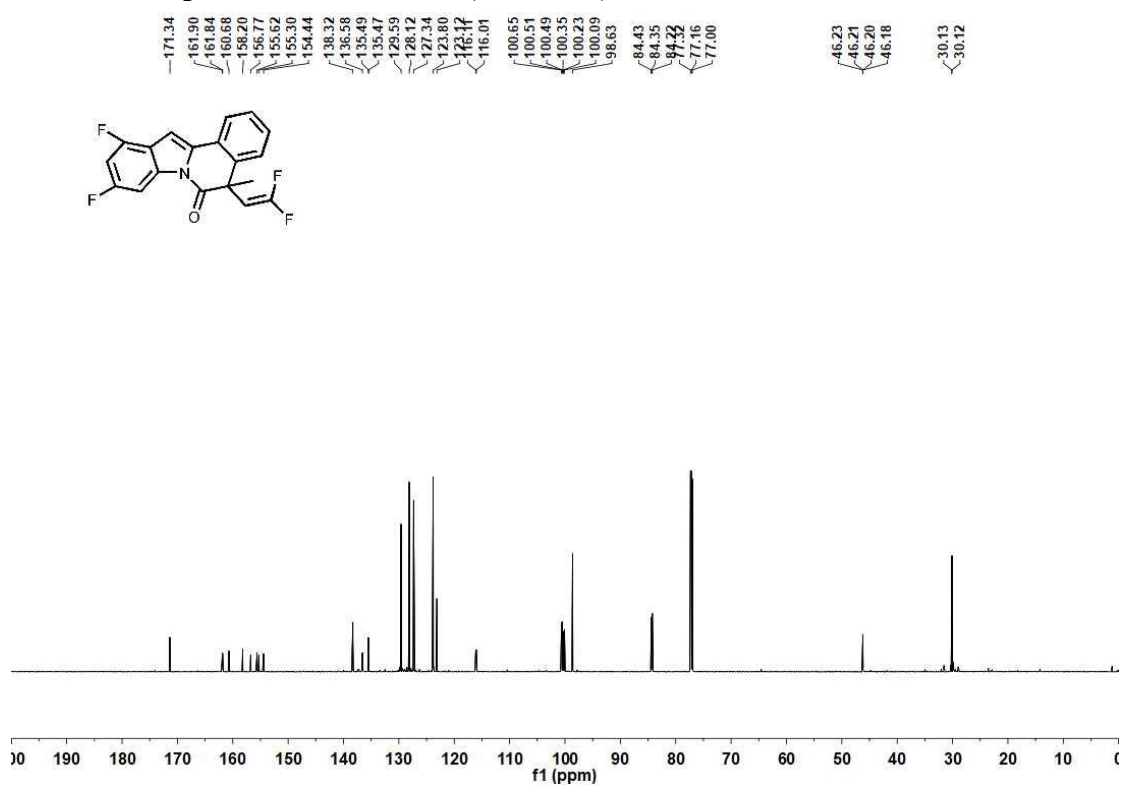

### <sup>19</sup>F NMR of product 3f in DMSO (565 MHz)

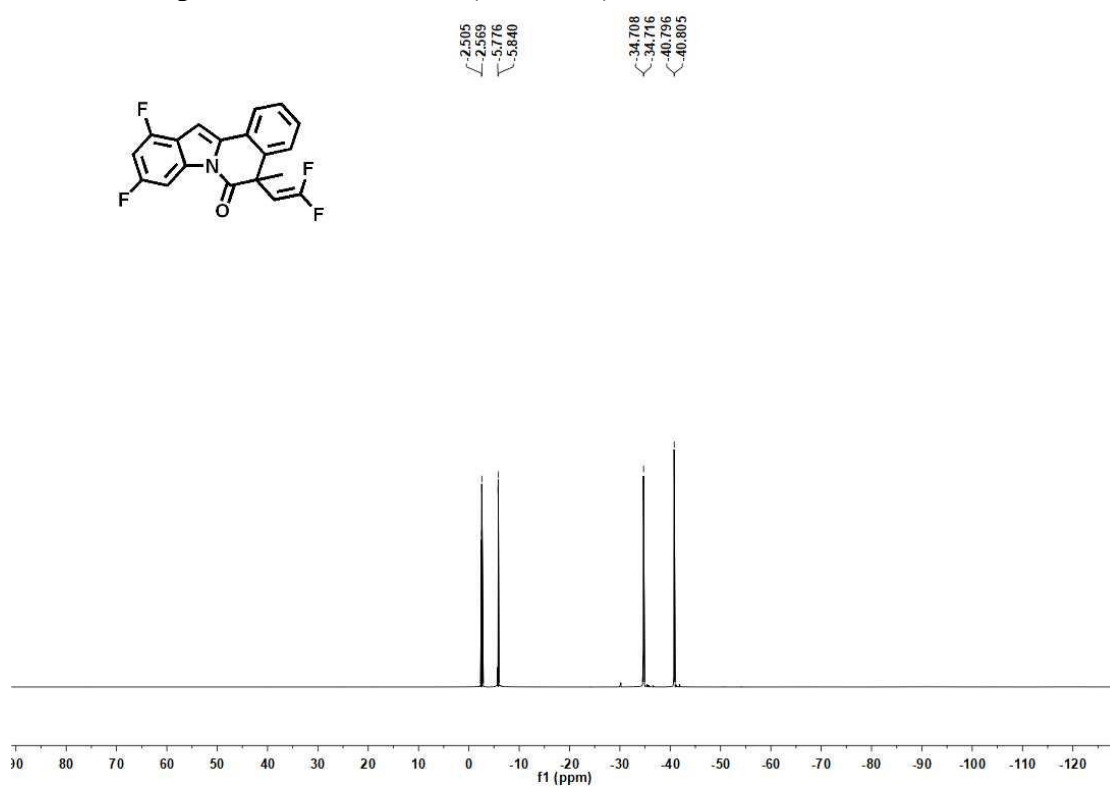

### <sup>1</sup>H NMR of product 3g in DMSO (600 MHz)

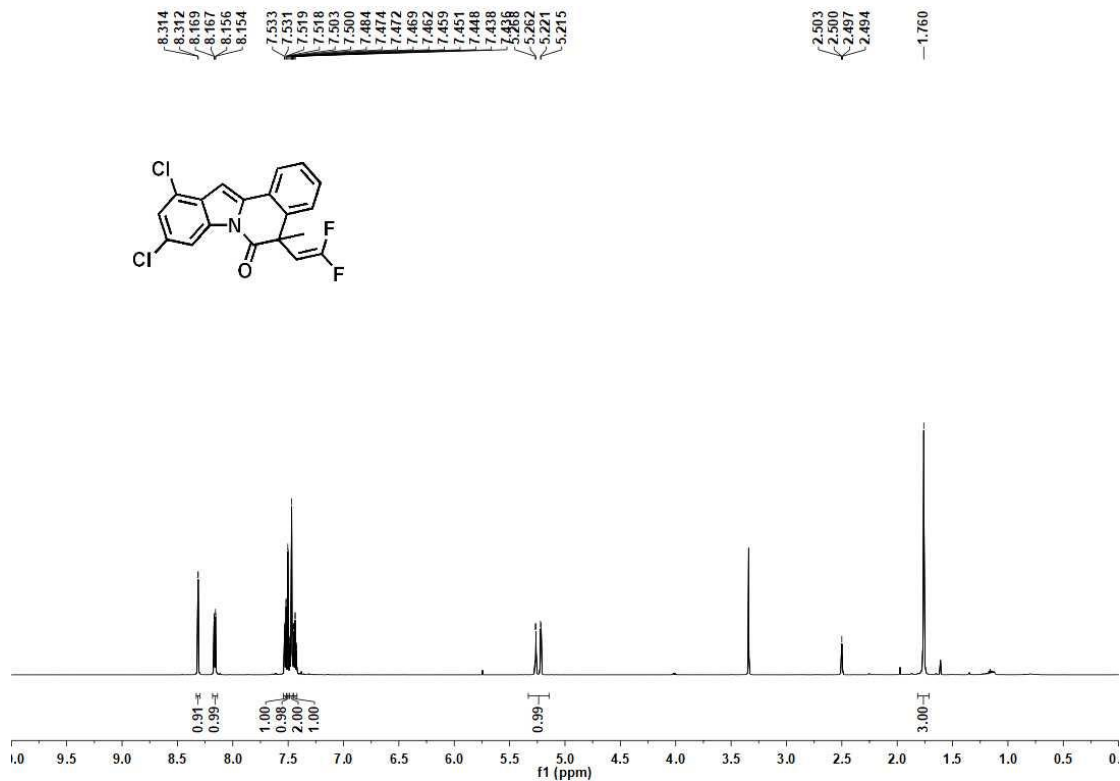

### <sup>13</sup>C NMR of product 3g in DMSO (151 MHz)

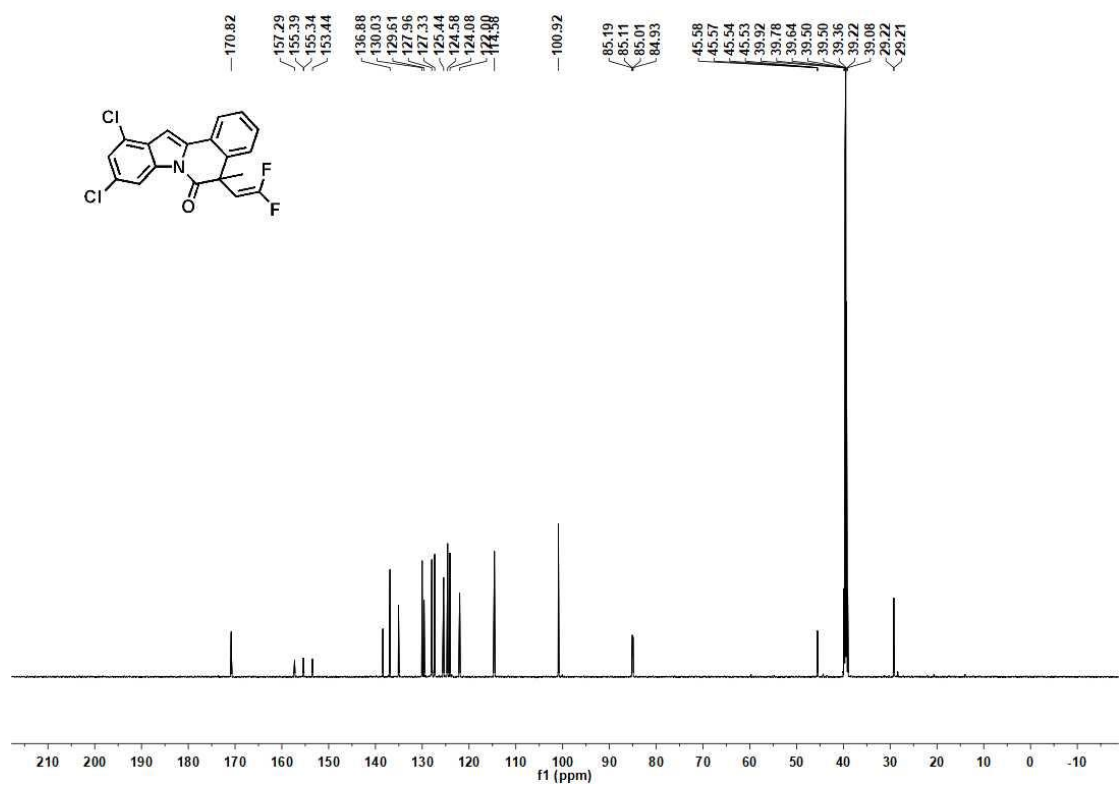



### <sup>19</sup>F NMR of product 3g in DMSO (565 MHz)

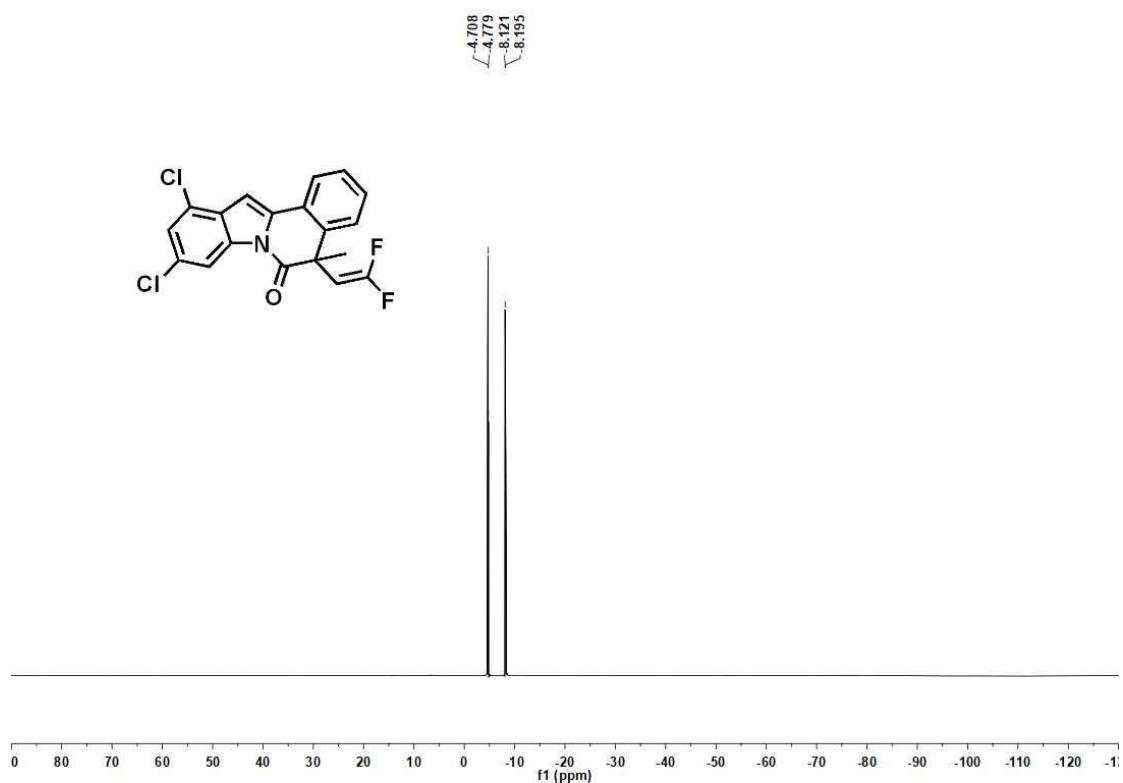

### <sup>1</sup>H NMR of product 3h in CDCl<sub>3</sub> (800 MHz)

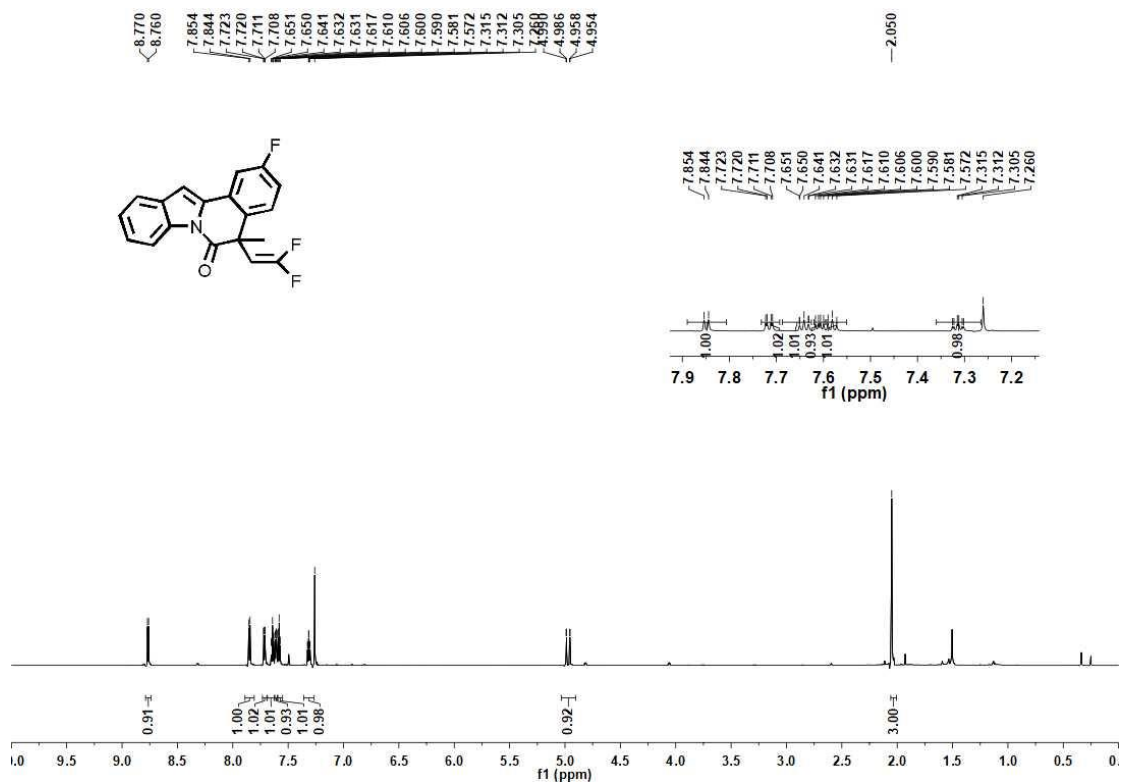

### <sup>13</sup>C NMR of product 3h in CDCl<sub>3</sub> (201 MHz)

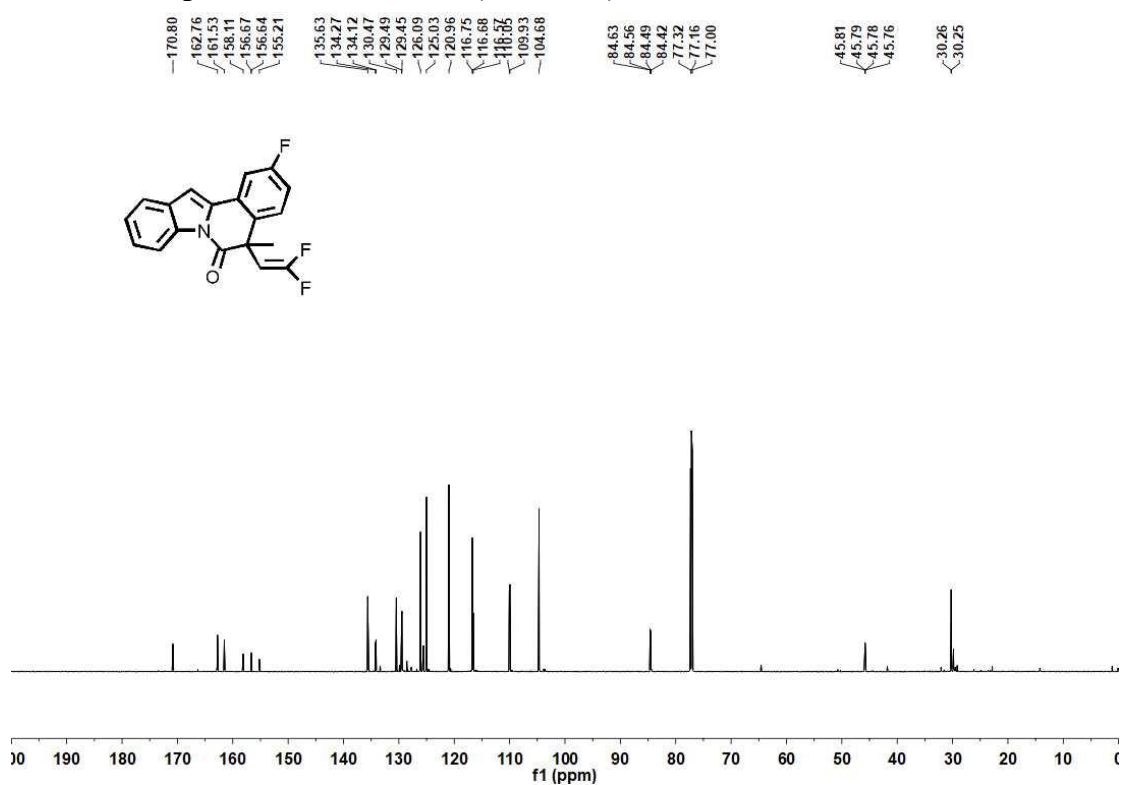

### <sup>19</sup>F NMR of product 3h in DMSO (565 MHz)

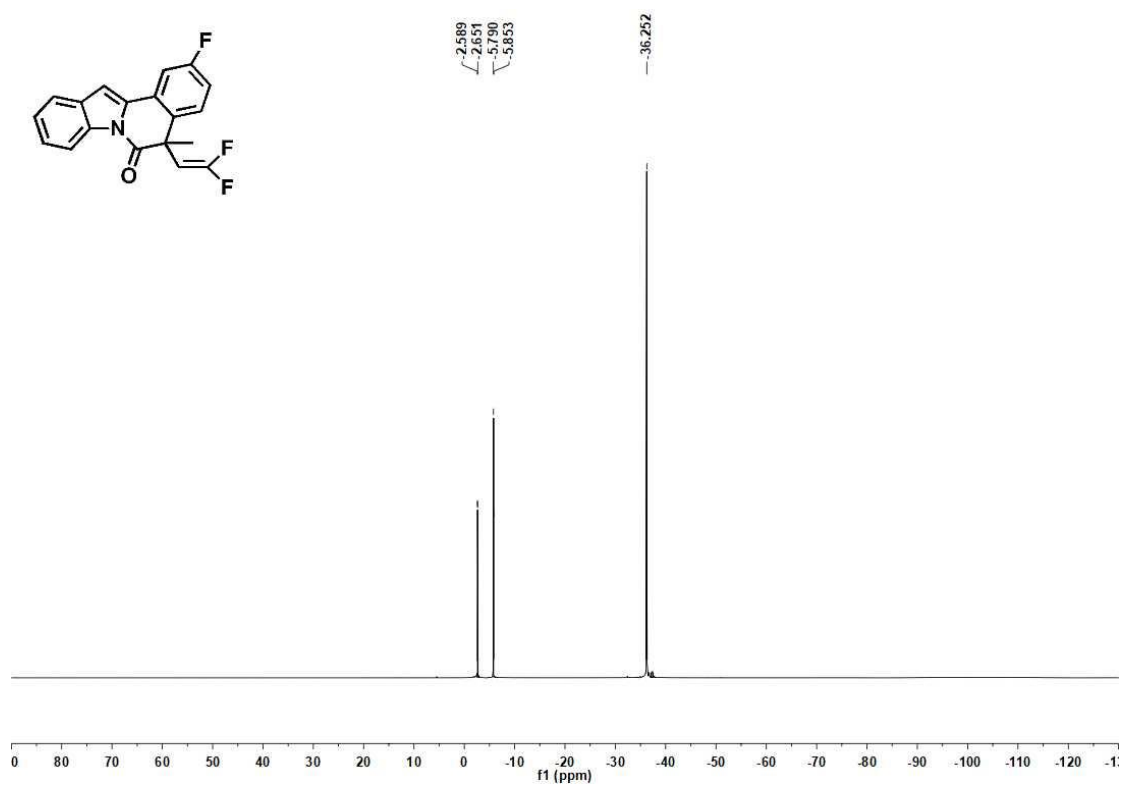

### $^1\text{H}$ NMR of product 4a in $\text{CDCl}_3$ (600 MHz)

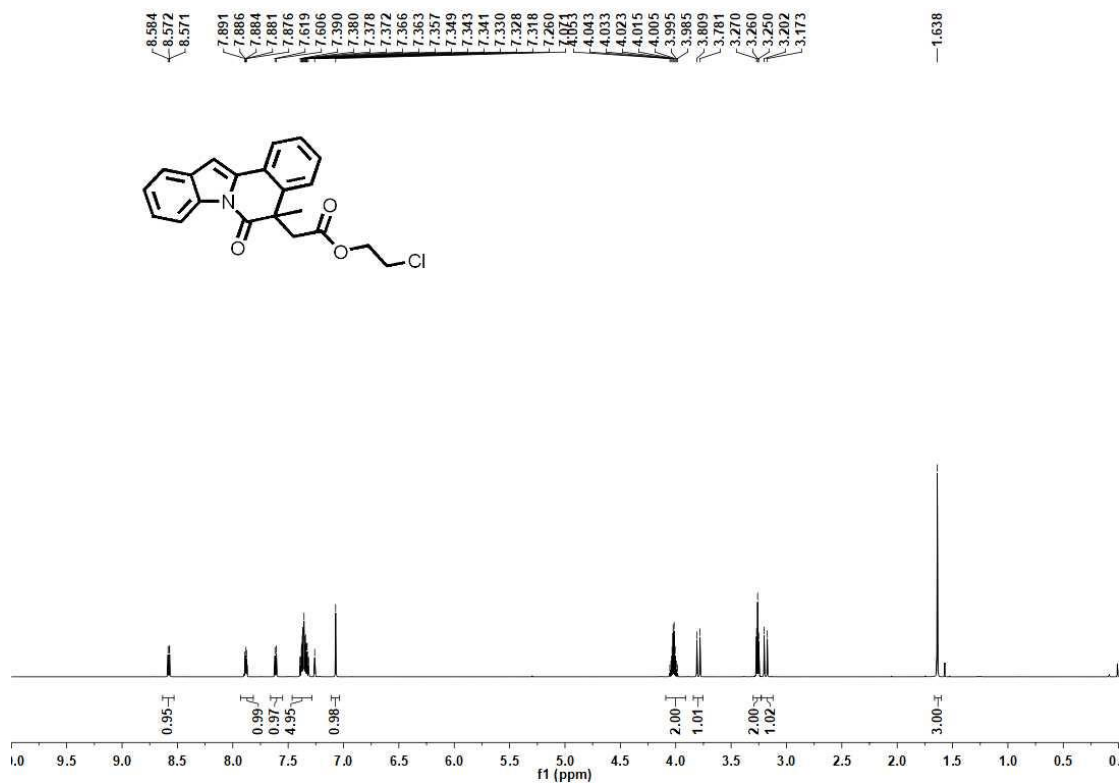

### $^{13}\text{C}$ NMR of product 4a in $\text{CDCl}_3$ (151 MHz)

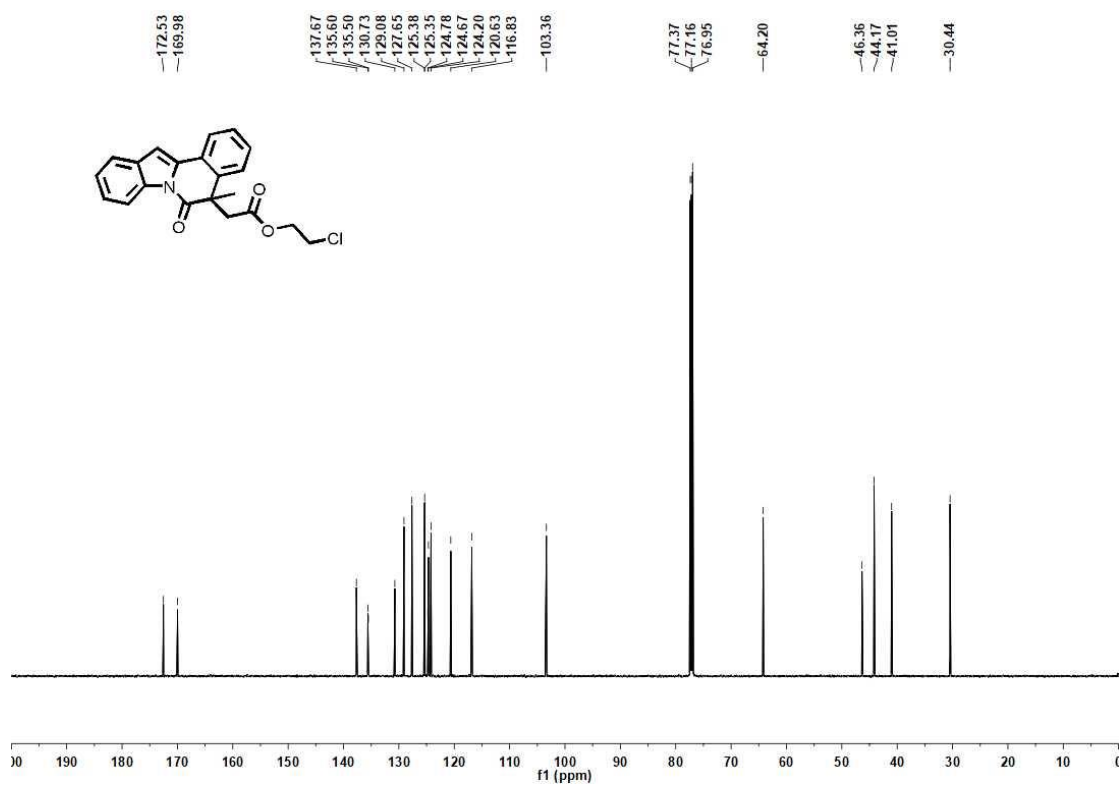

### <sup>1</sup>H NMR of product 4b in CDCl<sub>3</sub> (800 MHz)

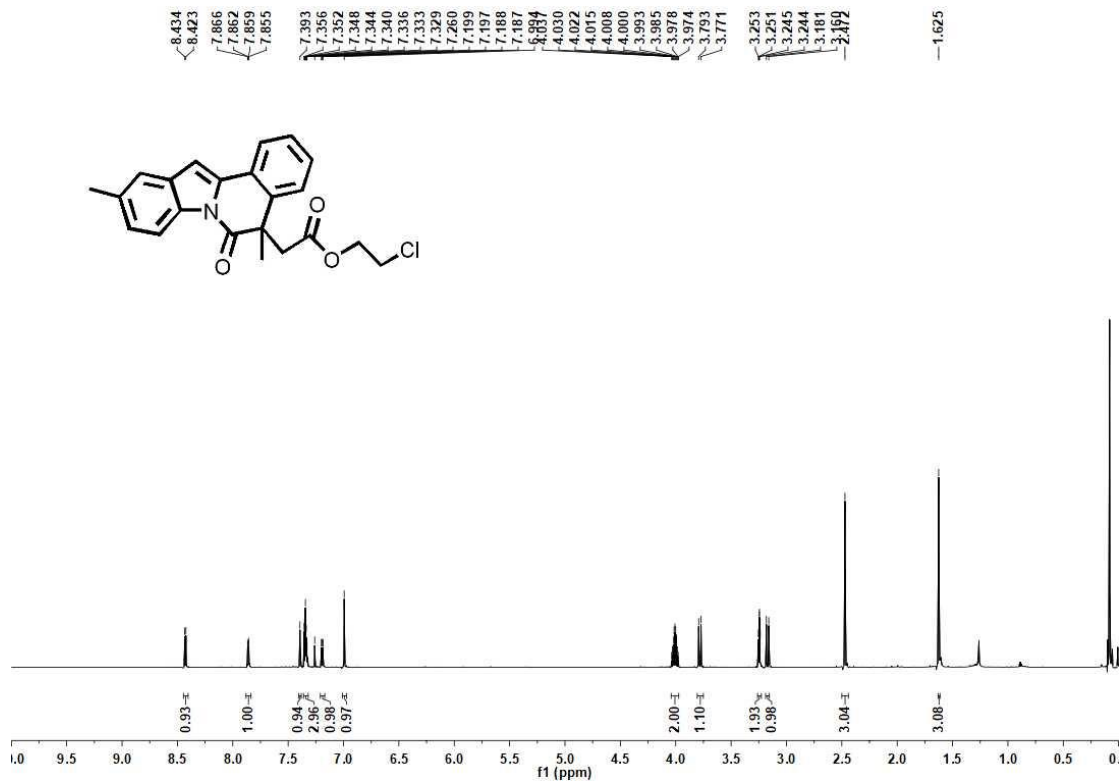

### <sup>13</sup>C NMR of product 4b in CDCl<sub>3</sub> (201 MHz)

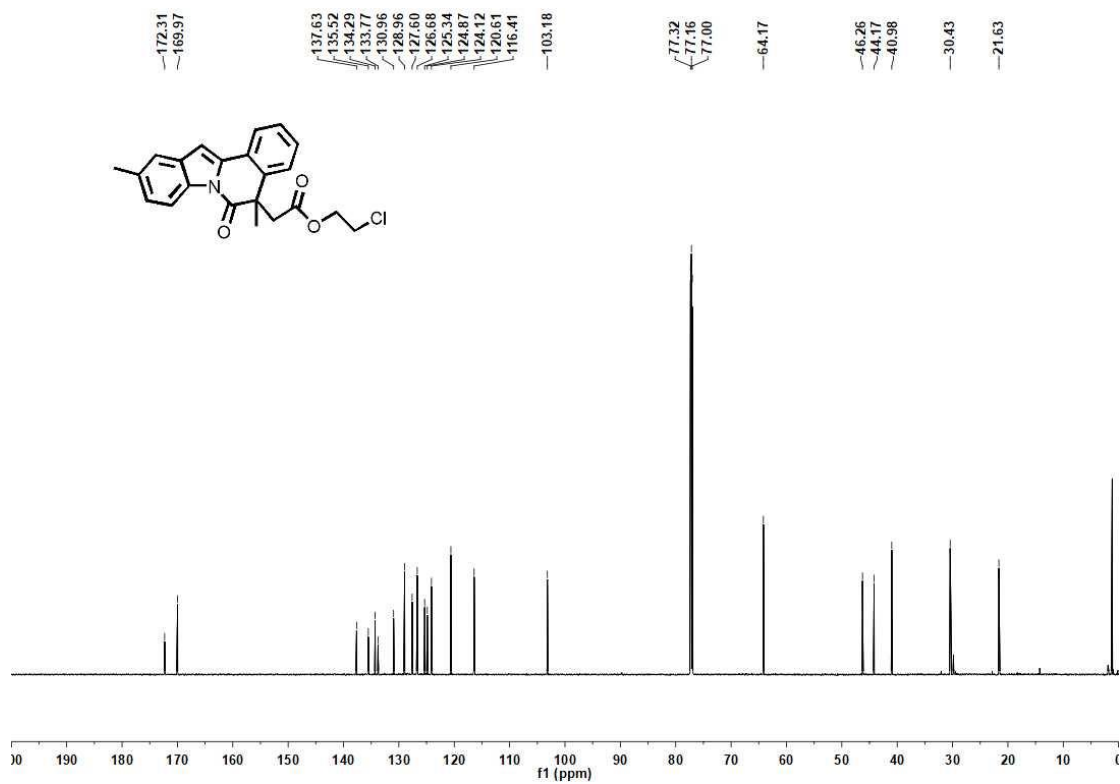

### $^1\text{H}$ NMR of product 4c in $\text{CDCl}_3$ (800 MHz)

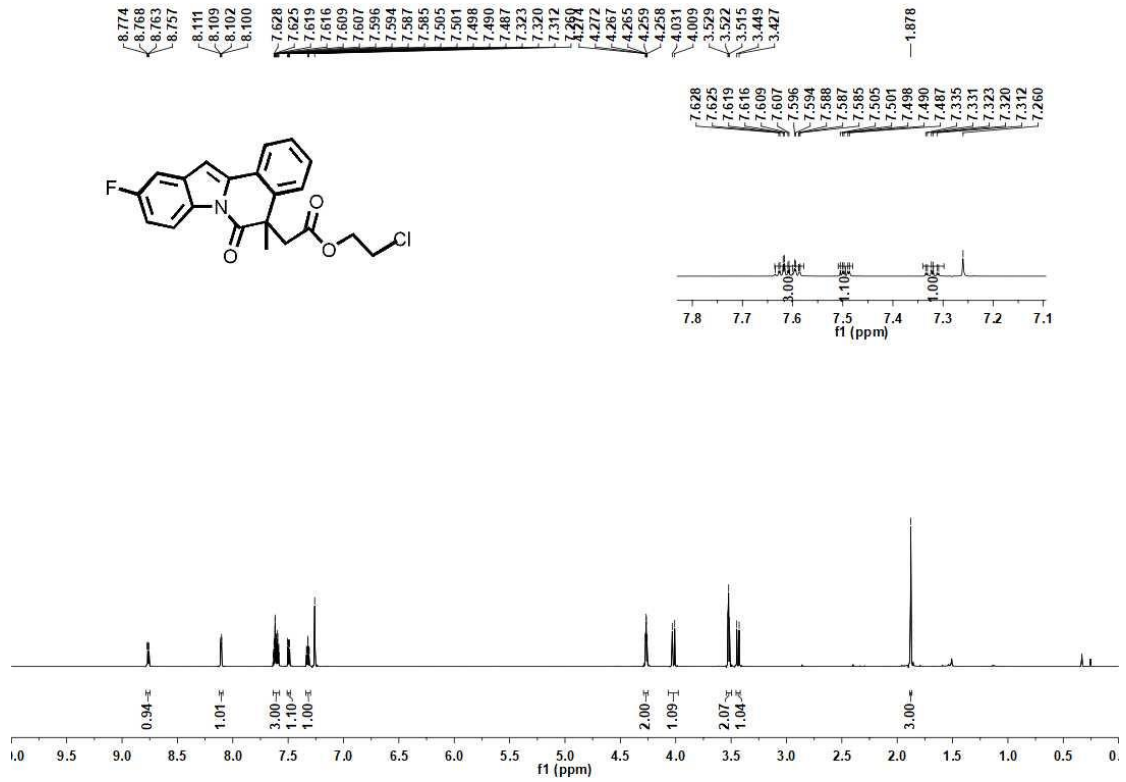

### $^{13}\text{C}$ NMR of product 4c in $\text{CDCl}_3$ (201 MHz)

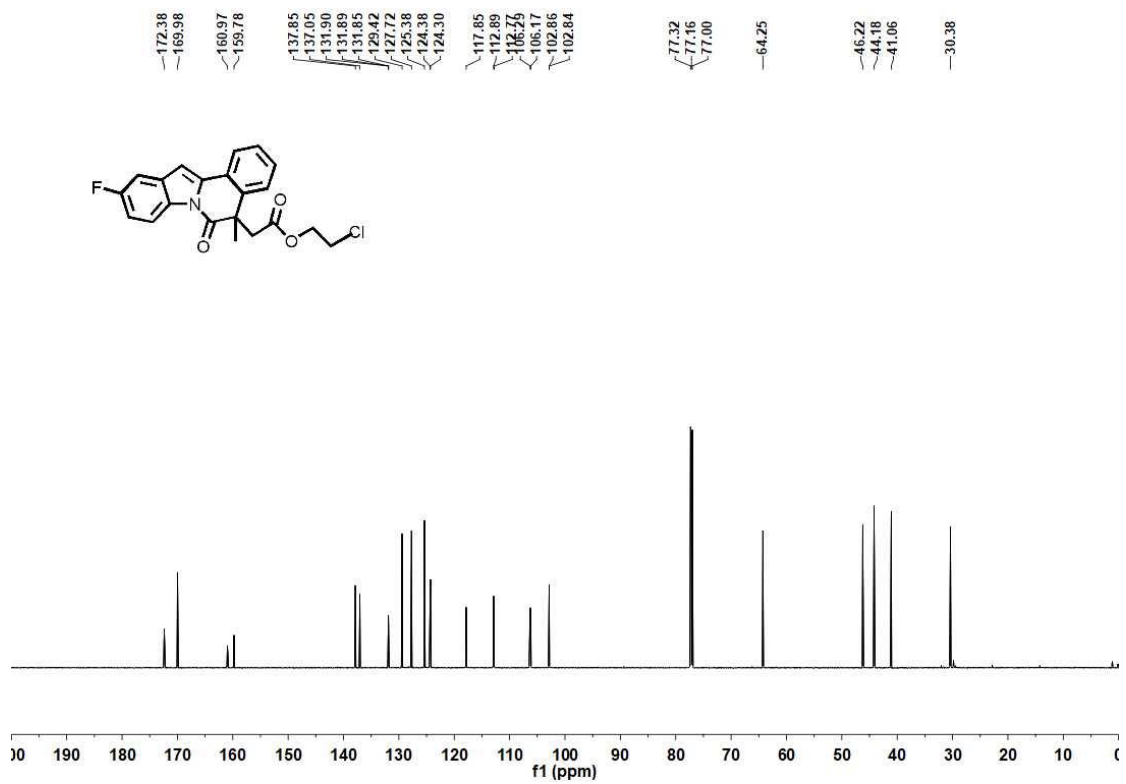

### <sup>1</sup>H NMR of product 4d in CDCl<sub>3</sub> (800 MHz)

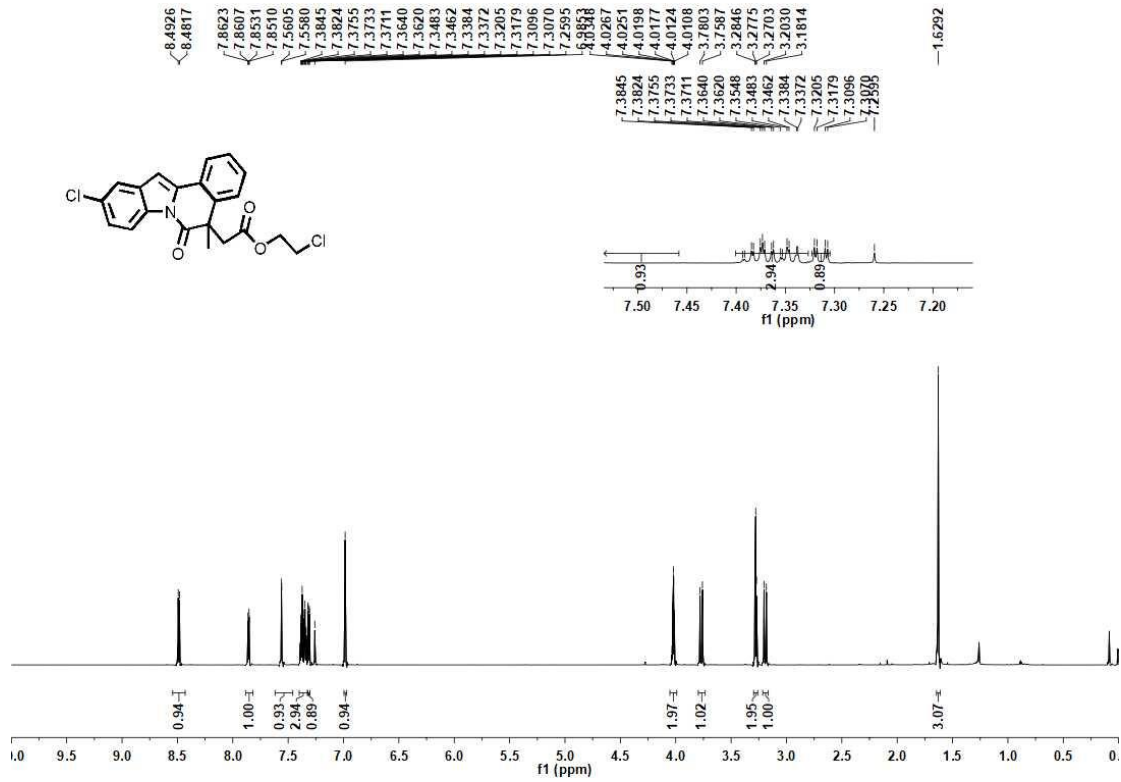

### <sup>13</sup>C NMR of product 4d in CDCl<sub>3</sub> (201 MHz)

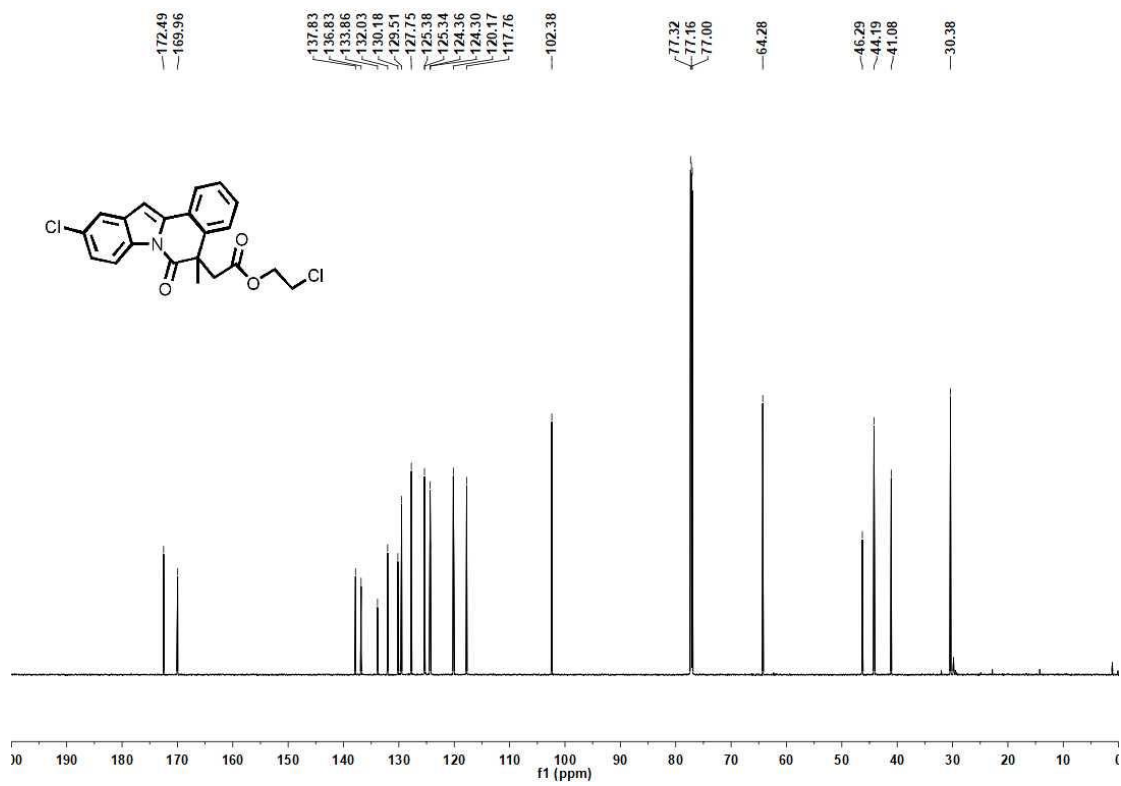

### <sup>1</sup>H NMR of product 4e in CDCl<sub>3</sub> (800 MHz)

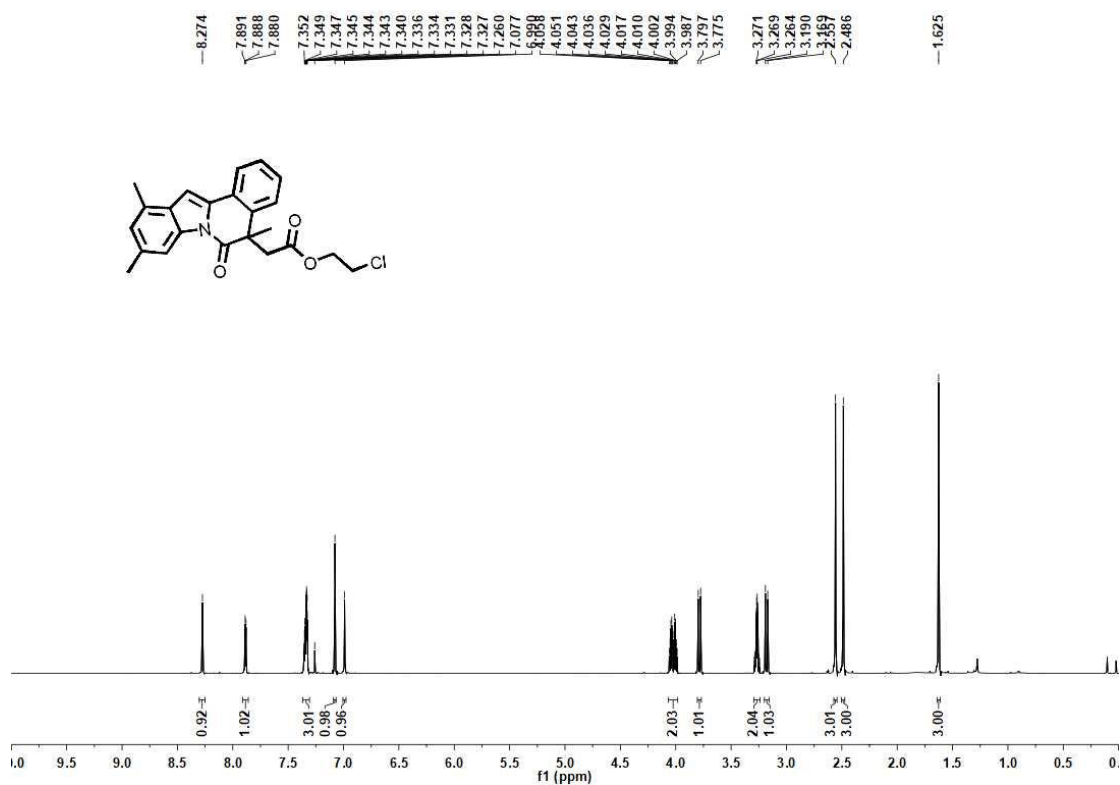

### <sup>13</sup>C NMR of product 4e in CDCl<sub>3</sub> (201 MHz)

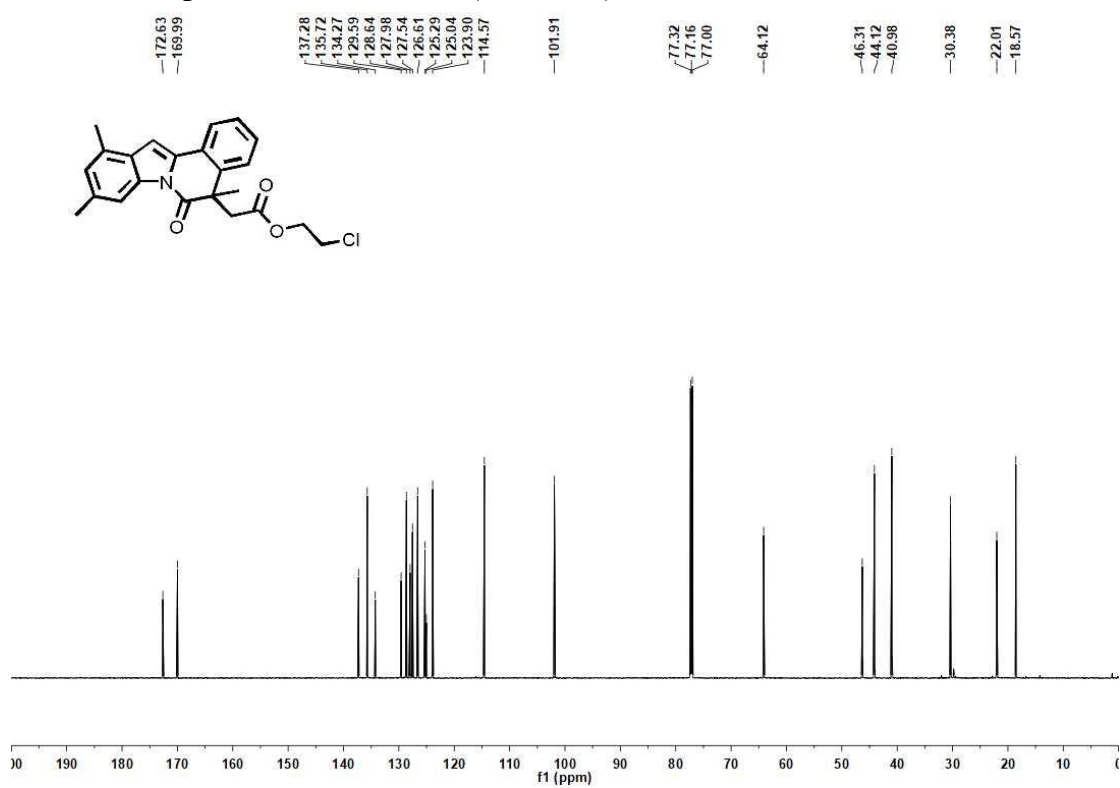

### <sup>1</sup>H NMR of product 4f in CDCl<sub>3</sub> (800 MHz)

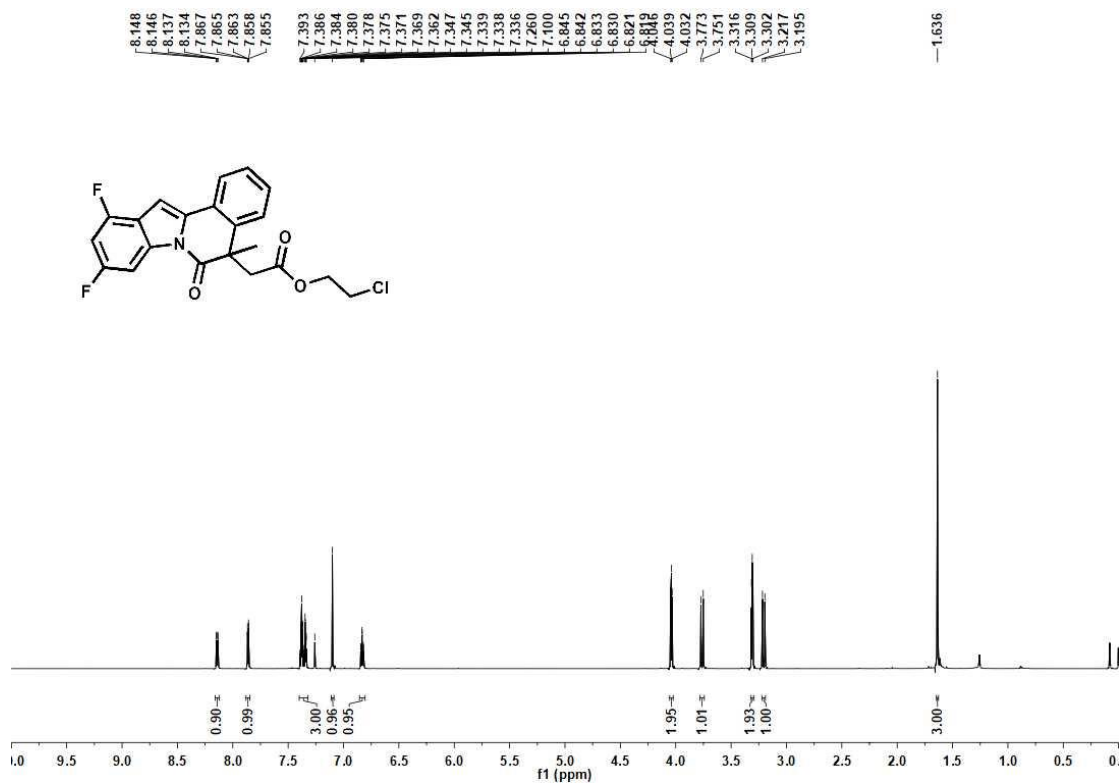

### <sup>13</sup>C NMR of product 4f in CDCl<sub>3</sub> (201 MHz)

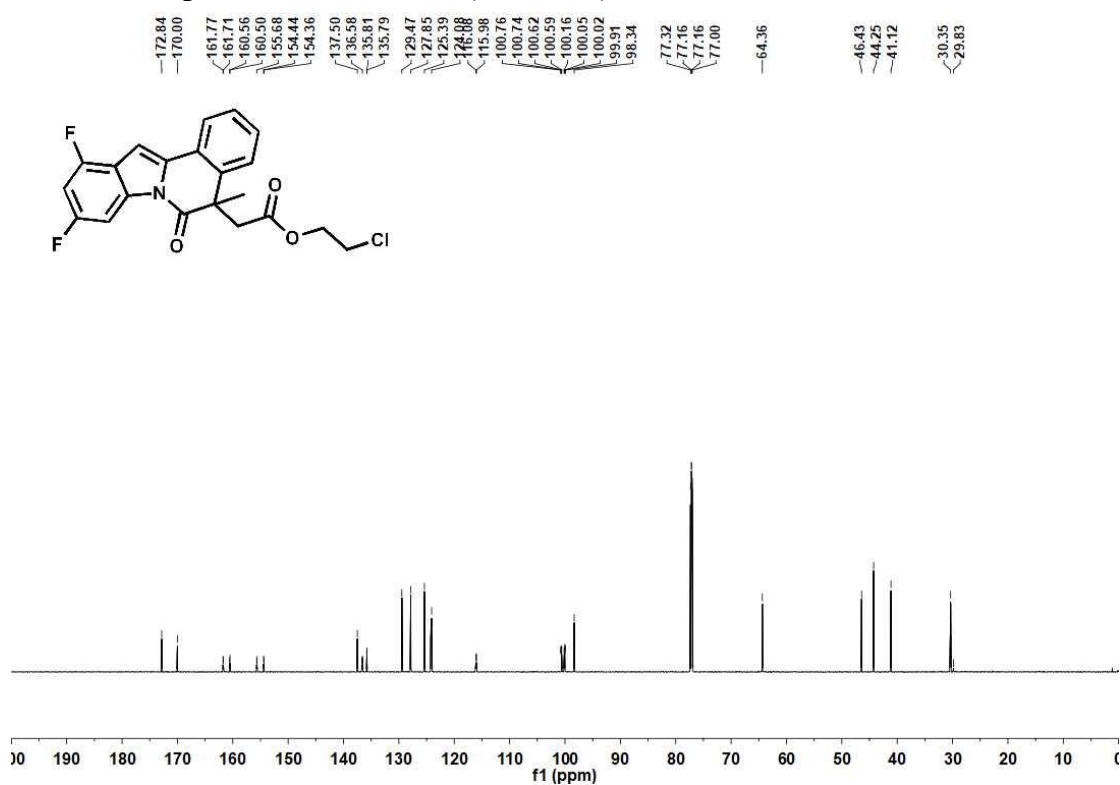



**<sup>1</sup>H NMR of product 4g in CDCl<sub>3</sub> (800 MHz)**

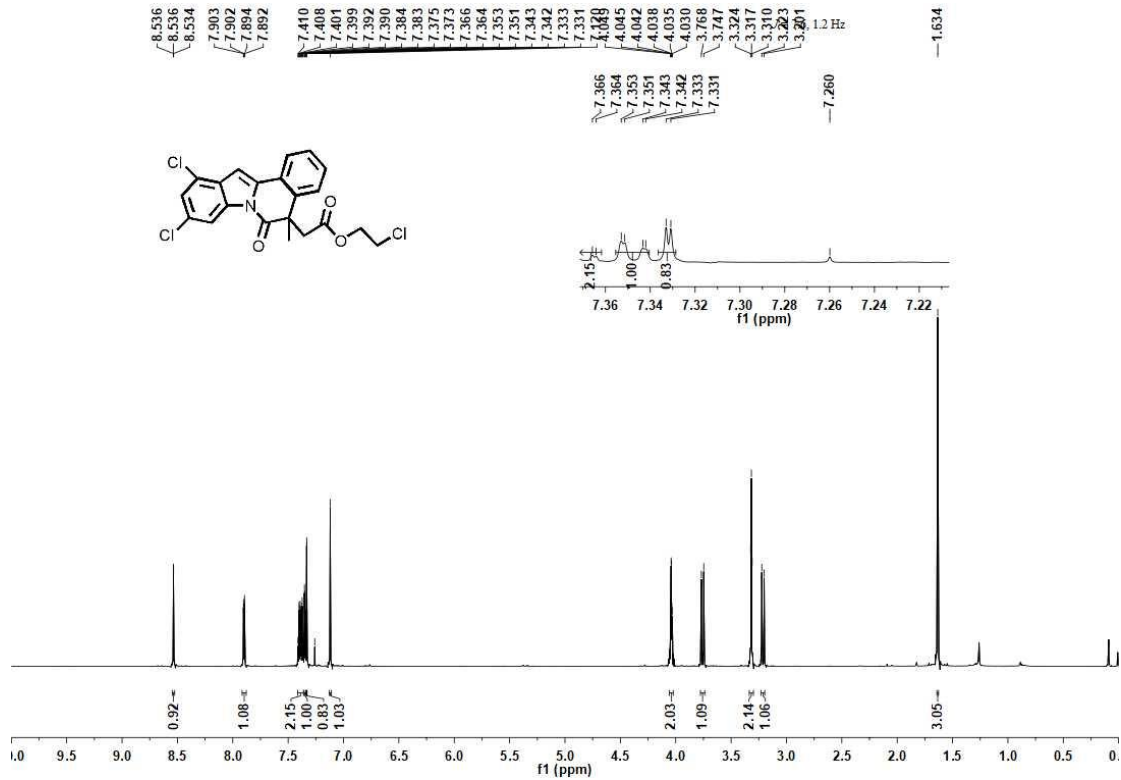

**<sup>13</sup>C NMR of product 4g in CDCl<sub>3</sub> (201 MHz)**

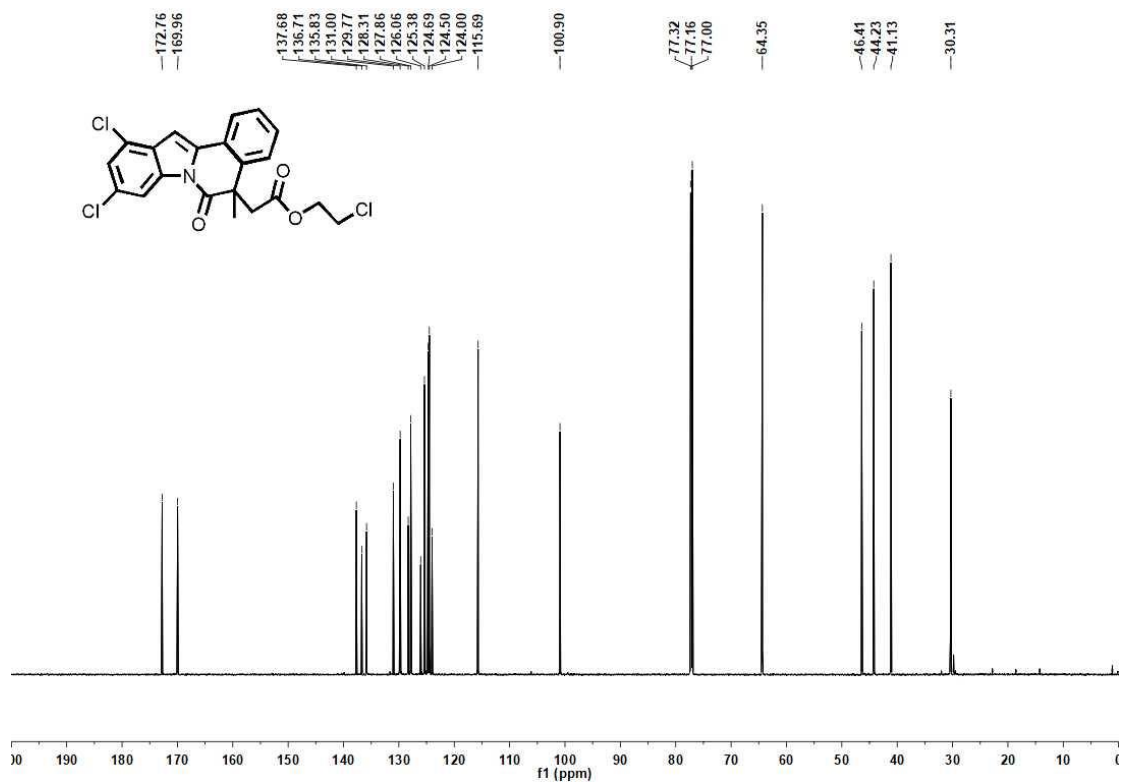

**$^1\text{H}$  NMR of product 4h in  $\text{CDCl}_3$  (800 MHz)**

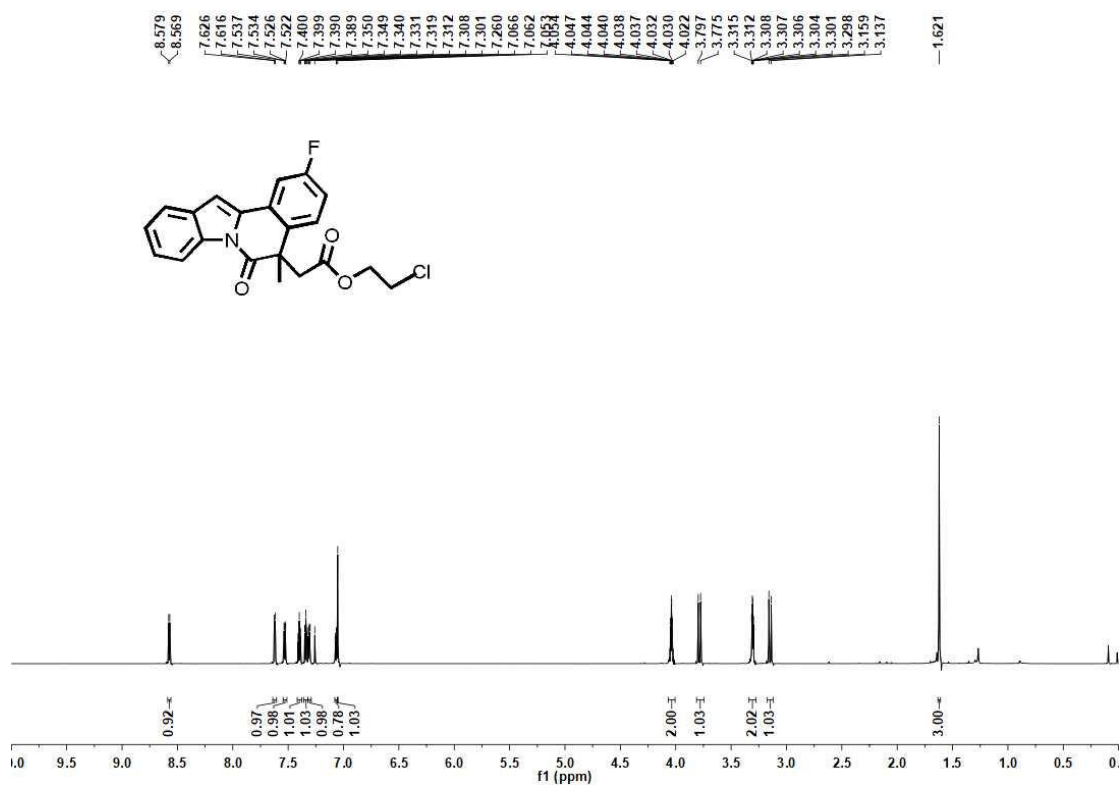

**$^{13}\text{C}$  NMR of product 4h in  $\text{CDCl}_3$  (201 MHz)**

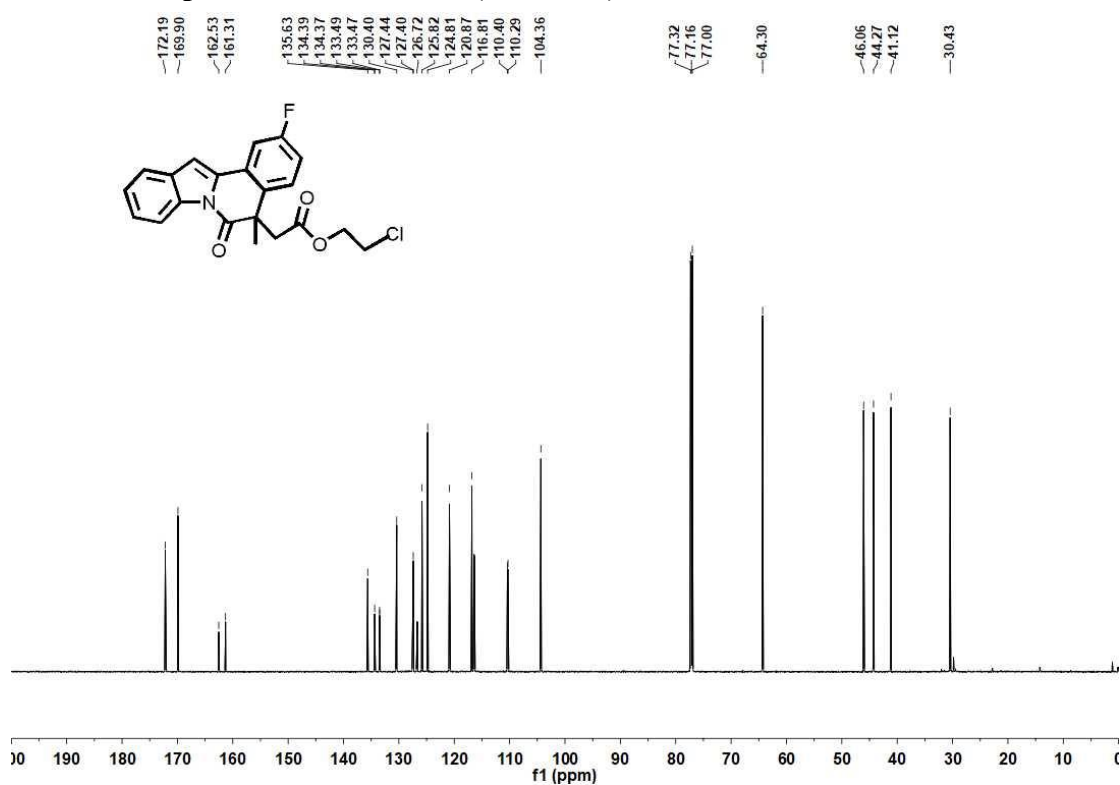

**<sup>1</sup>H NMR of product 4i in CDCl<sub>3</sub> (800 MHz)**

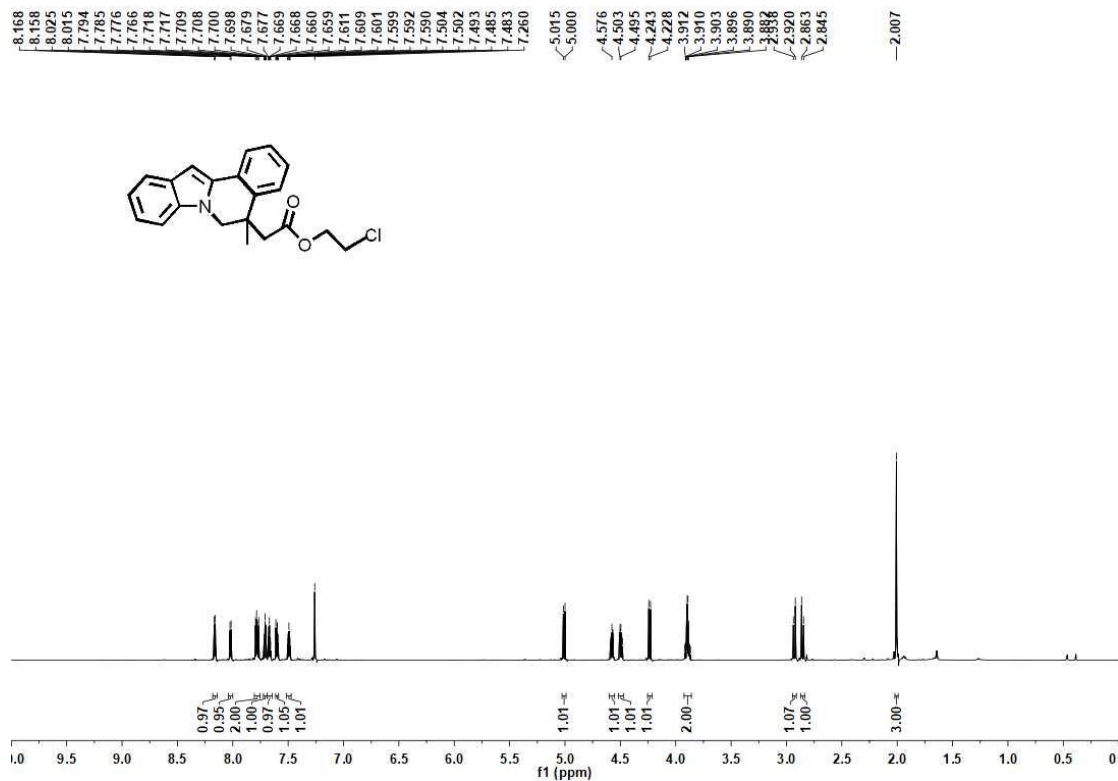

**<sup>13</sup>C NMR of product 4i in CDCl<sub>3</sub> (201 MHz)**

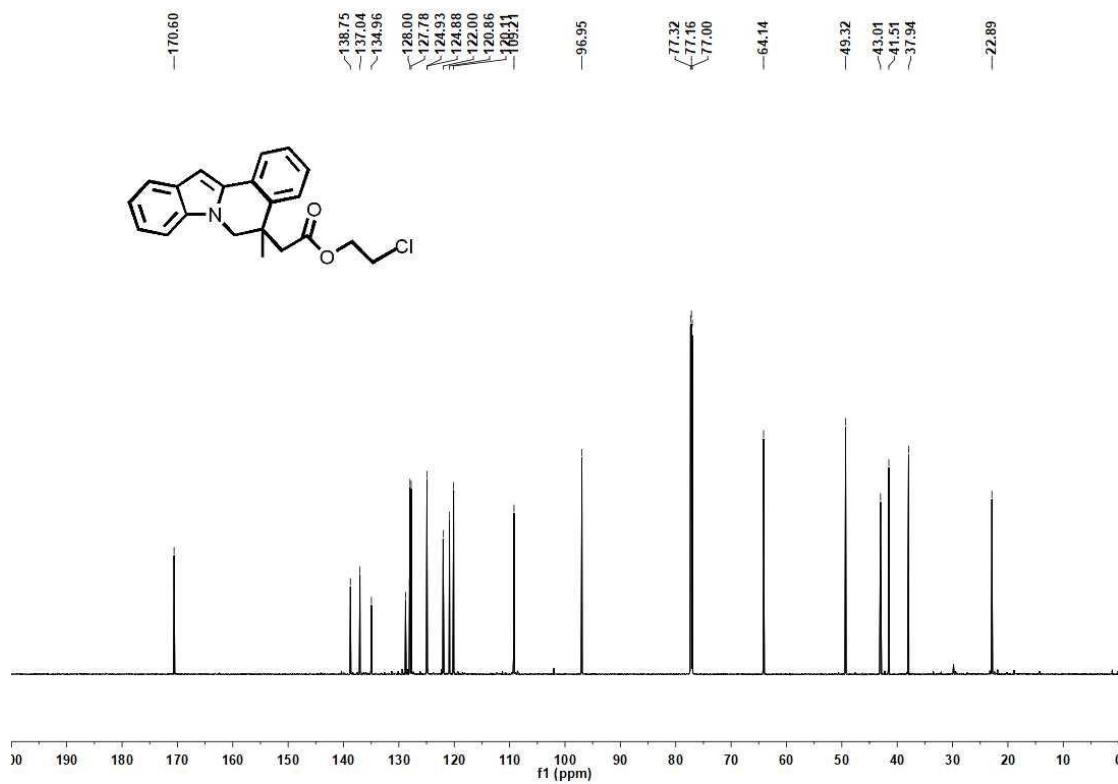

**<sup>1</sup>H NMR of product 4j in CDCl<sub>3</sub> (800 MHz)**

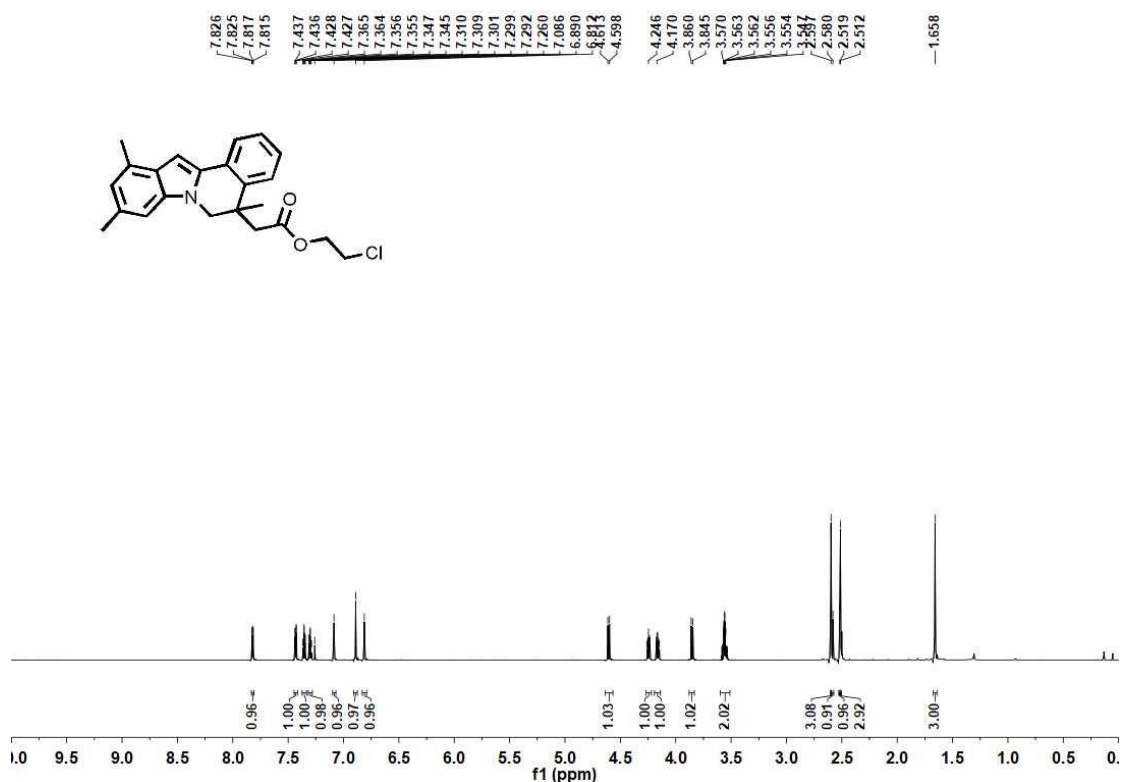

**<sup>13</sup>C NMR of product 4j in CDCl<sub>3</sub> (201 MHz)**

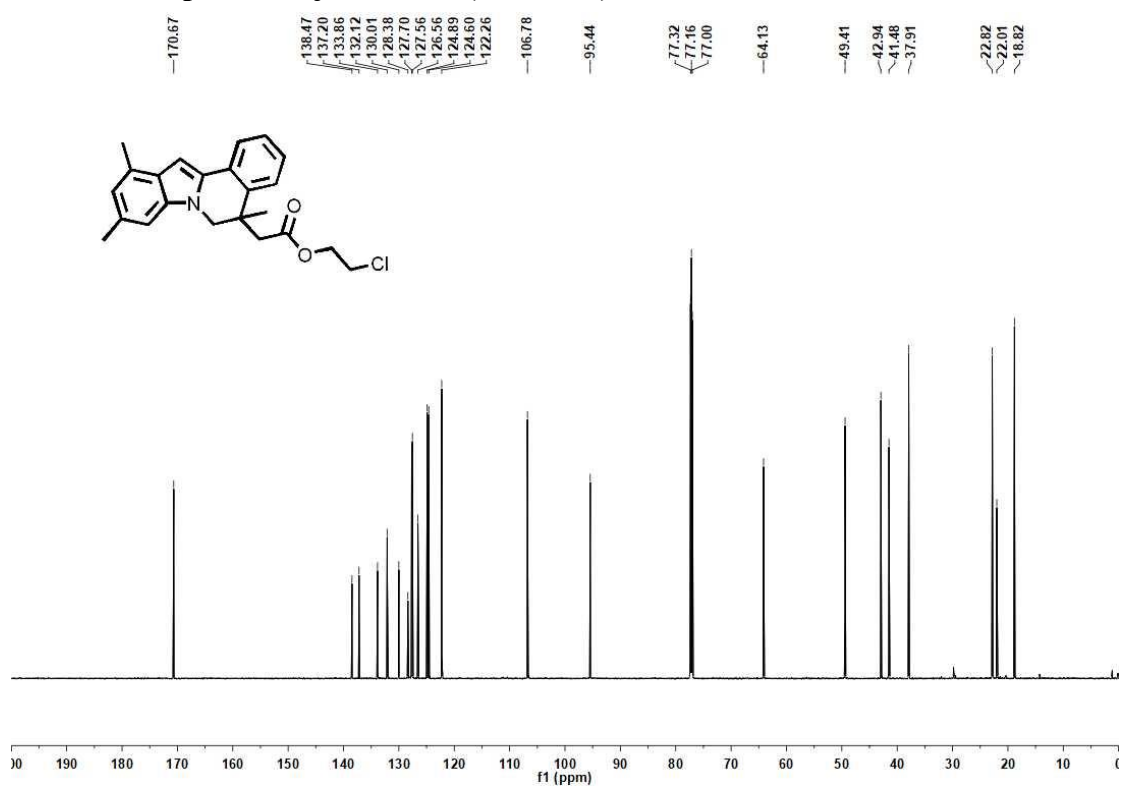

**<sup>1</sup>H NMR of product 4k in CDCl<sub>3</sub> (800 MHz)**

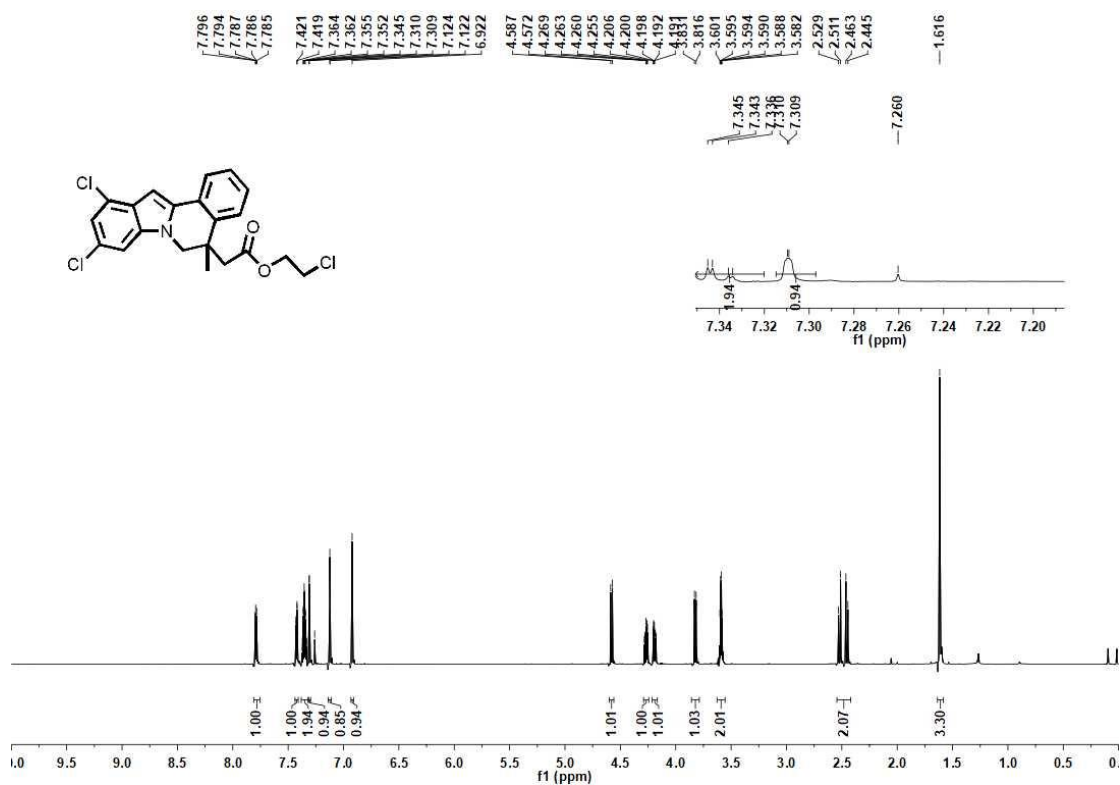

**<sup>13</sup>C NMR of product 4k in CDCl<sub>3</sub> (201 MHz)**

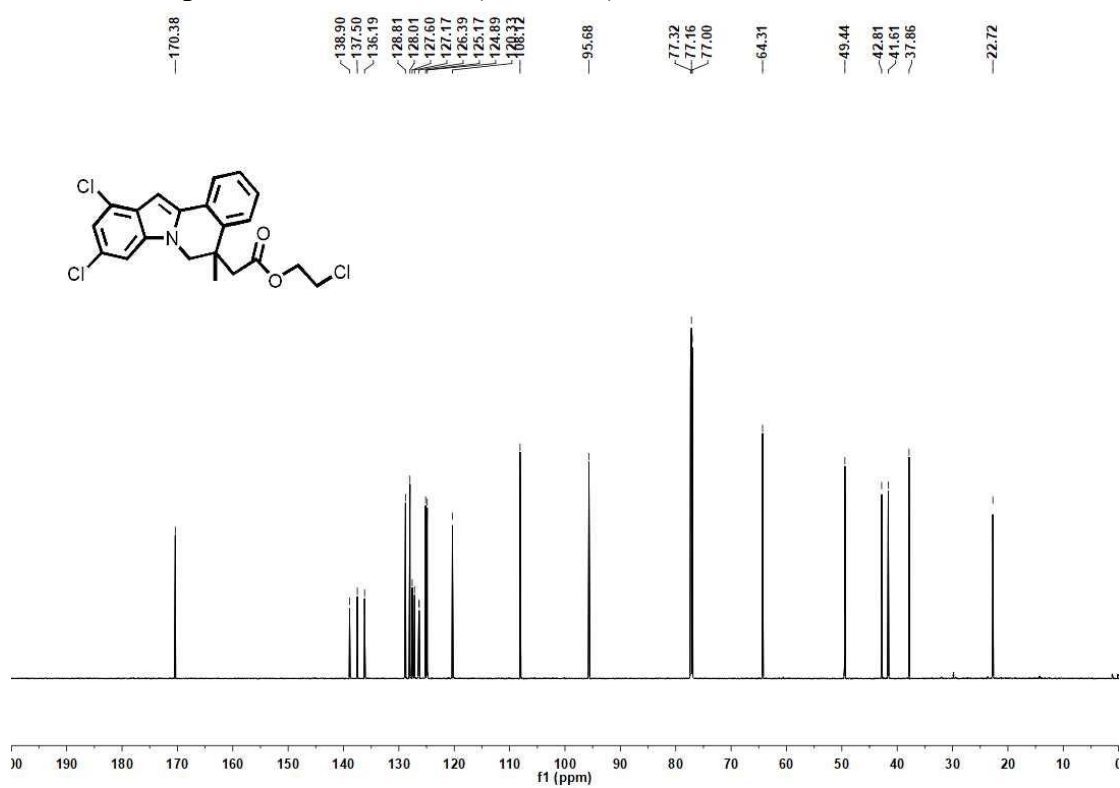

### $^1\text{H}$ NMR of product 5a in $\text{CDCl}_3$ (600 MHz)

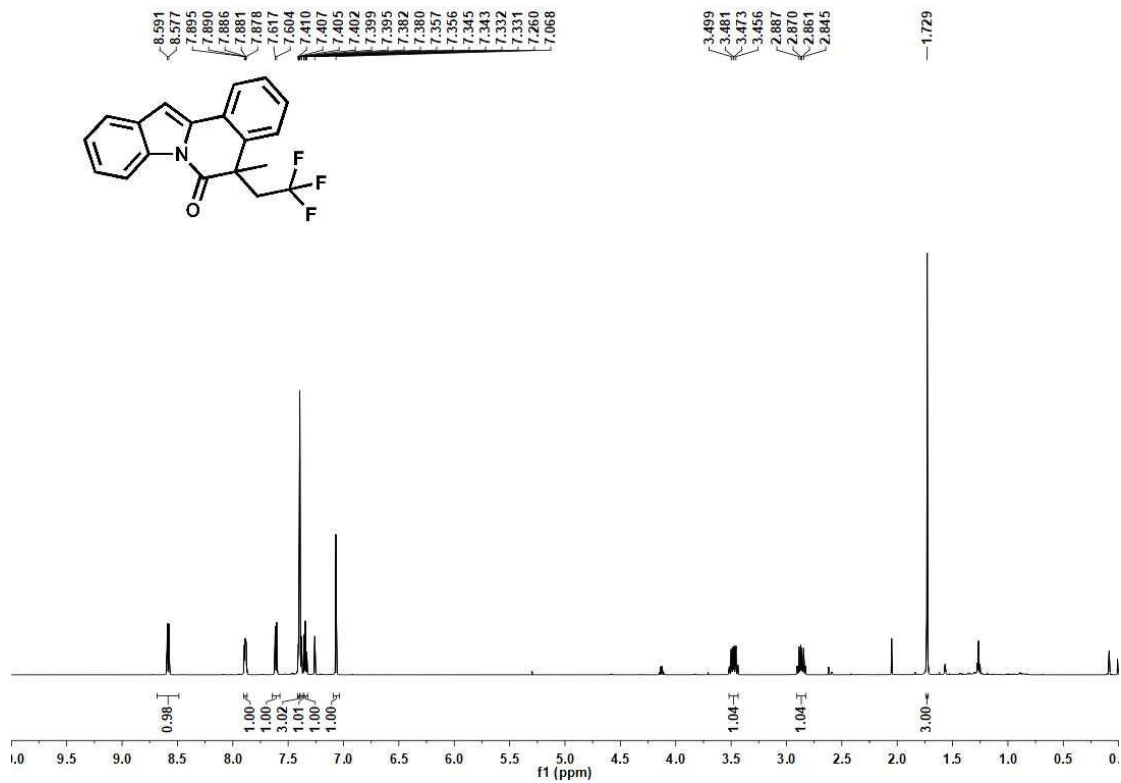

### $^{13}\text{C}$ NMR of product 5a in $\text{CDCl}_3$ (151 MHz)

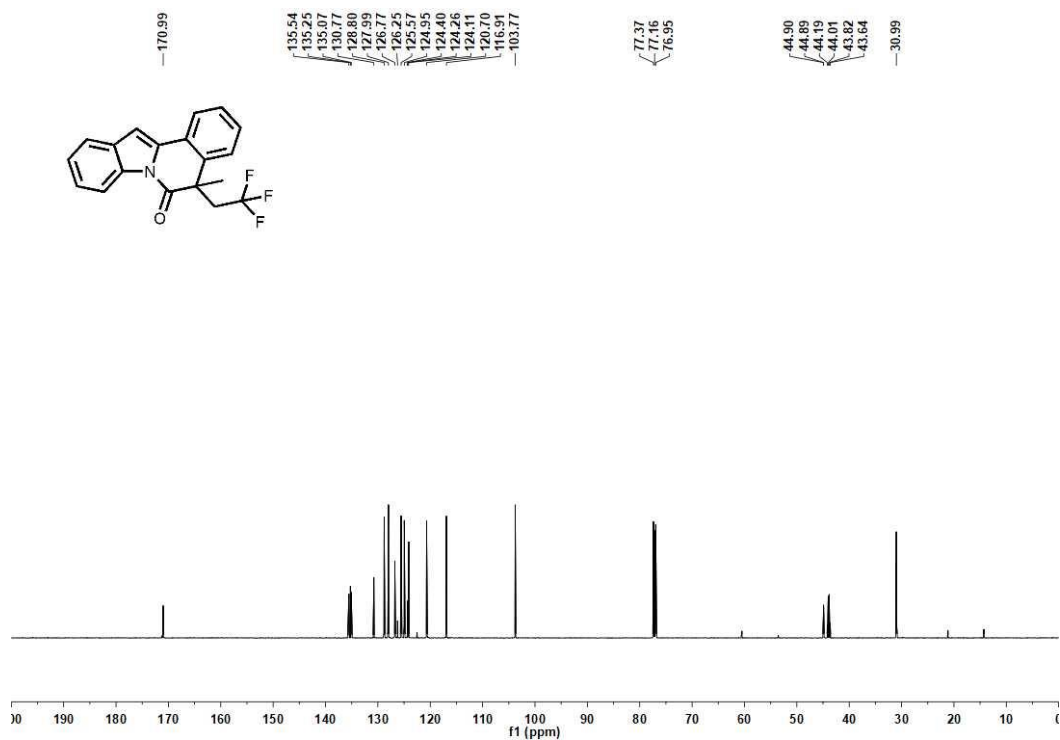

**<sup>19</sup>F NMR of product 5a in DMSO (565 MHz)**

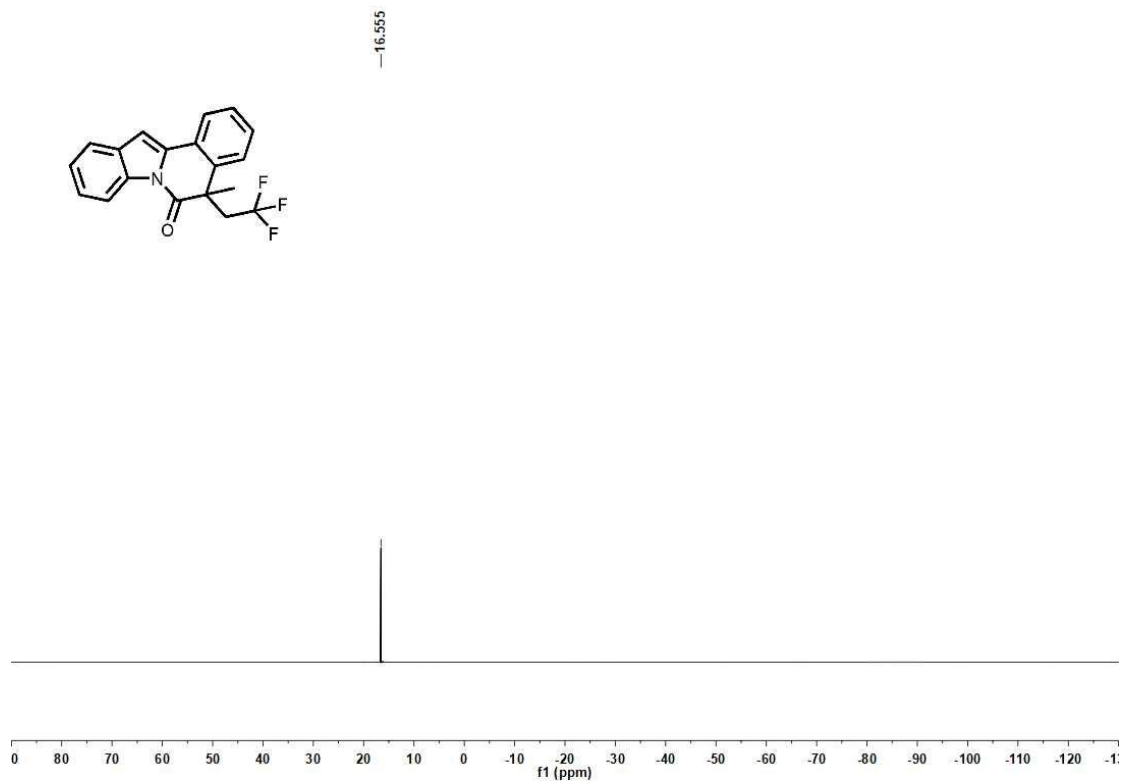

**<sup>1</sup>H NMR of product 5b in CDCl<sub>3</sub> (600 MHz)**

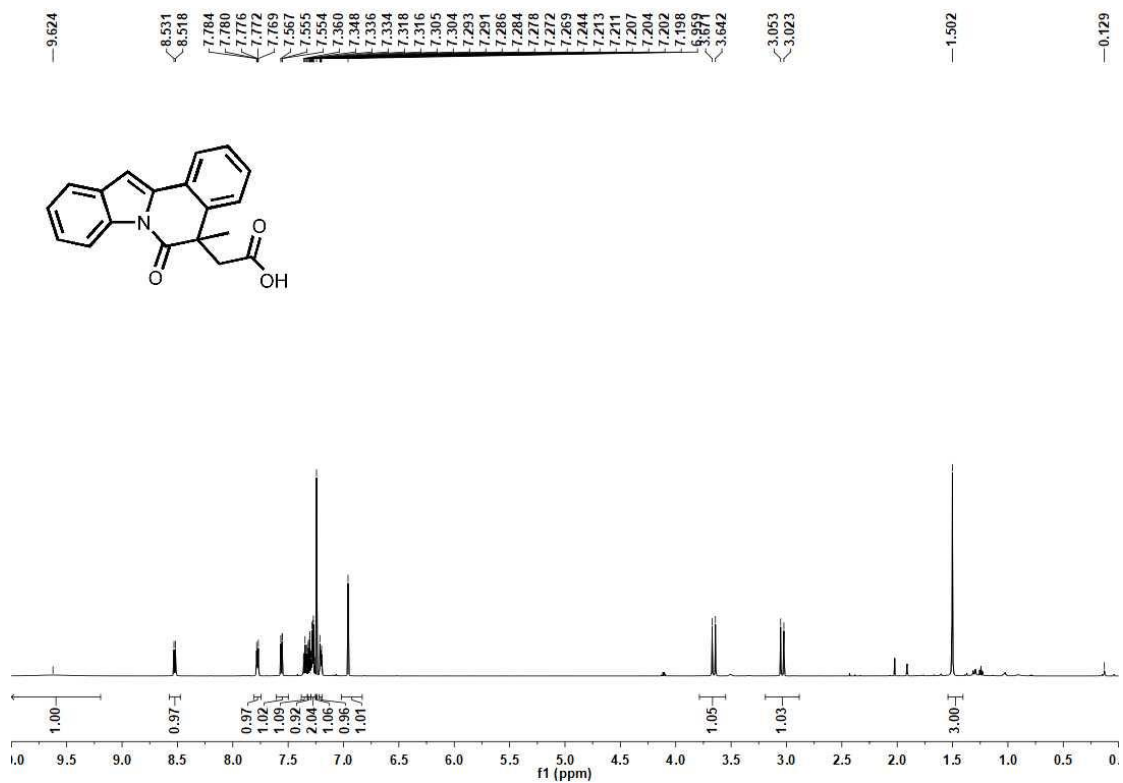

**$^{13}\text{C}$  NMR of product 5b in  $\text{CDCl}_3$  (151 MHz)**

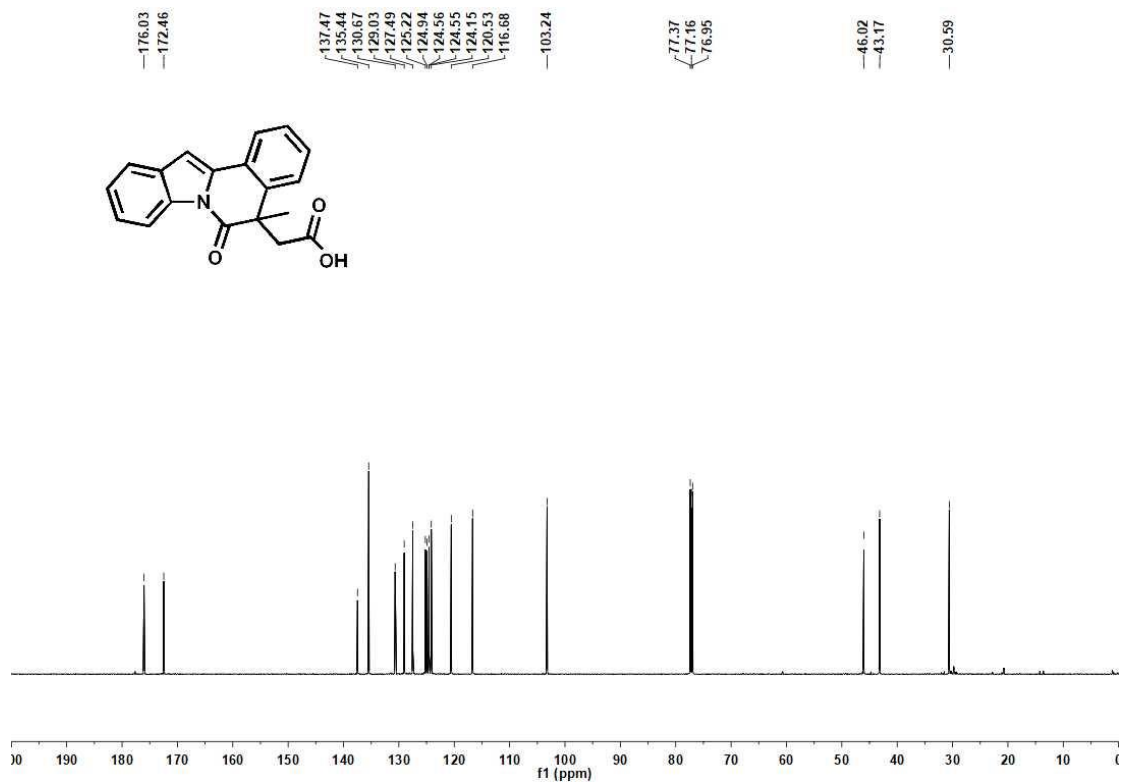

Supplement: d4qo00392f1.pdf [file d4qo00392f1.pdf]
